# Supplementary material for: Synthesis of 2-triazolyl-imidazo[1,2-a]pyridine through a one-pot three-component reaction using a nano copper oxide assisted click-catalyst
Source: Royal Society of Chemistry journal article supplement (doi:10.1039/c5ra09671e), 2015-01-01

## Synthesis of 2-triazolyl-imidazo[1,2-*a*]pyridine through one-pot three-component reaction using nano copper oxide assisted click-catalyst

Prasanta Ray Bagdi,<sup>a</sup> R. Sidick Basha<sup>a</sup> and Abu T. Khan<sup>\*a,b</sup>

<sup>a</sup>*Department of Chemistry, Indian Institute of Technology Guwahati, Guwahati 781 039, India. Tel.: +91 361 2582305; Fax: +91 361 2582349. Email: atk@iitg.ernet.in (A.T. Khan)*

<sup>b</sup>*Present address: Vice-Chancellor, Aliah University, IIA/27, New Town, Near Eco-Space, Kolkata-700 156, India.*

|                                                                                     |      |
|-------------------------------------------------------------------------------------|------|
| Title page                                                                          | 1    |
| Experimental section and Spectra data of Compounds 4 and 5                          | 2-3  |
| Crystal Data and Structure Refinement for Compound <b>4f</b> and <b>8c</b>          | 4    |
| Copies of <sup>1</sup> H NMR, <sup>13</sup> C NMR and HRMS spectra of all Compounds | 5-94 |

## I. General Information and Methods.

<sup>1</sup>H and <sup>13</sup>C NMR spectra were recorded on 400 MHz, 600 MHz and 100 MHz, 150 MHz spectrometer TMS as internal reference; chemical shifts ( $\delta$  scale) are reported in parts per million (ppm). <sup>1</sup>H NMR Spectra are reported in the order: multiplicity, coupling constant ( $J$  value) in hertz (Hz) and no of protons; signals were characterized as s (singlet), d (doublet), t (triplet), q (quatret), m (multiplet) and bs (broad). IR spectra were recorded in KBr or neat. HRMS spectra were recorded using ESI (TOF) mode. The X-ray crystal structures were determined with a diffractometer. Complete crystallographic data of **4f** (CCDC no. 979591) and **8c** (CCDC no. 1019691) for the structural analysis have been deposited with the Cambridge Crystallographic Data Centre, Copies of this information may be obtained free of charge from the Director, Cambridge Crystallographic Data Centre, 12 Union Road, Cambridge CB2 1EZ, UK, (fax: +44-1223-336033, e-mail: [deposit@ccdc.cam.ac.uk](mailto:deposit@ccdc.cam.ac.uk) or via: [www.ccdc.cam.ac.uk](http://www.ccdc.cam.ac.uk)). The copper oxide nanoparticle (particle size <50 nm, CAS Number 1317-38-0) was purchased from Sigma-Aldrich.

### Spectra data of Compounds 4 and 5

**(1-benzyl-1H-1,2,3-triazol-4-yl)methanol (4a):** Yield 92%, white solid, mp 78-79 °C, <sup>1</sup>H NMR (400 MHz, CDCl<sub>3</sub>):  $\delta$  7.51 (s, 1H), 7.32-7.31 (m, 3H), 7.23-7.21 (m, 2H), 5.44 (s, 2H), 4.69 (s, 2H), 4.23 (br s, 1H); <sup>13</sup>C NMR (150 MHz, CDCl<sub>3</sub>):  $\delta$  148.8, 134.6, 129.1, 128.8, 128.2, 122.4, 56.0, 54.2; IR (KBr) $\nu_{\max}$  3265, 3139, 3086, 3030, 2935, 2882, 1605, 1551, 1456, 1371, 1325, 1222, 1132, 1014 cm<sup>-1</sup>.

**(1-(4-methylbenzyl)-1H-1,2,3-triazol-4-yl)methanol (4b):** Yield 90%, white solid, mp 91-92 °C, <sup>1</sup>H NMR (400 MHz, CDCl<sub>3</sub>):  $\delta$  7.43 (s, 1H), 7.12 (br s, 4H), 5.39 (s, 2H), 4.67 (s, 2H), 3.89 (br s, 1H), 2.29 (s, 3H); <sup>13</sup>C NMR (100 MHz, CDCl<sub>3</sub>):  $\delta$  148.3, 138.5, 131.5, 129.6, 128.1, 122.2, 55.7, 53.9, 21.1; IR (KBr) $\nu_{\max}$  3252, 3140, 3086, 3050, 2945, 2917, 1612, 1553, 1515, 1446, 1375, 1330, 1223, 1134, 1013 cm<sup>-1</sup>.

**(1-(4-bromobenzyl)-1H-1,2,3-triazol-4-yl)methanol (4c):** Yield 86%, white solid, mp 224-225 °C, <sup>1</sup>H NMR (400 MHz, CDCl<sub>3</sub>):  $\delta$  7.47 (d,  $J$  = 8.4 Hz, 2H), 7.44 (s, 1H), 7.12 (d,  $J$  = 8.4 Hz, 2H), 5.44 (s, 2H), 4.74 (s, 2H), 2.33 (br s, 1H); <sup>13</sup>C NMR (100 MHz, CDCl<sub>3</sub>):  $\delta$  148.2, 133.6, 131.1, 129.1, 121.5, 121.5, 55.0, 52.2; IR (KBr) $\nu_{\max}$  3259, 3115, 3063, 2957, 2866, 1591, 1543, 1489, 1465, 1407, 1357, 1336, 1230, 1126, 1064, 1012 cm<sup>-1</sup>.

**(1-(4-fluorobenzyl)-1H-1,2,3-triazol-4-yl)methanol (4d):** Yield 90%, white solid, mp 68-69 °C, <sup>1</sup>H NMR (400 MHz, CDCl<sub>3</sub>):  $\delta$  7.53 (s, 1H), 7.25-7.21 (m, 2H), 7.02-6.97 (m, 2H), 5.42 (s, 2H), 4.82 (br s, 1H), 4.68 (s, 2H); <sup>13</sup>C NMR (100 MHz, CDCl<sub>3</sub>):  $\delta$  163.8, 161.3, 148.3, 130.6, 130.5, 129.9, 129.8, 122.1, 115.9, 115.7, 55.6, 53.1; IR (KBr) $\nu_{\max}$  3291, 3144, 3000, 2949, 2877, 1606, 1546, 1511, 1460, 1420, 1366, 1229, 1157, 1127, 1006 cm<sup>-1</sup>.

**(1-allyl-1H-1,2,3-triazol-4-yl)methanol (4e):** Yield 80%, white solid, mp 81-82 °C, <sup>1</sup>H NMR (400 MHz, CDCl<sub>3</sub>):  $\delta$  7.59 (s, 1H), 6.04-5.95 (m, 1H), 5.35 (d,  $J$  = 10.4 Hz, 1H), 5.30 (d,  $J$  = 17.2 Hz, 1H), 4.96 (d,  $J$  = 6.4 Hz, 2H), 4.75 (s, 2H), 3.48 (br s, 1H); <sup>13</sup>C NMR (100 MHz, CDCl<sub>3</sub>):  $\delta$  148.2, 131.2, 122.1, 120.1, 55.8, 52.6; IR (KBr) $\nu_{\max}$  3266, 3147, 3092, 2933, 2877, 1646, 1553, 1457, 1435, 1420, 1336, 1225, 1141, 1056, 1011 cm<sup>-1</sup>.

**Ethyl 2-(4-(hydroxymethyl)-1H-1,2,3-triazol-1-yl)acetate (4f):** Yield 78%, white solid, mp 68-69 °C, <sup>1</sup>H NMR (400 MHz, CDCl<sub>3</sub>):  $\delta$  7.65 (s, 1H), 5.09 (s, 2H), 4.64 (s, 2H), 4.17 (q,  $J$  = 7.2 Hz, 2H), 1.22 (t,  $J$  = 7.2 Hz, 3H); <sup>13</sup>C NMR (100 MHz, CDCl<sub>3</sub>):  $\delta$  166.7, 148.3, 123.9, 62.4, 55.8, 50.9, 14.1; IR (KBr) $\nu_{\max}$  3260, 3133, 3088, 2993, 2936, 2865, 1744, 1556, 1455, 1421, 1400, 1379, 1345, 1237, 1145, 1063, 1021 cm<sup>-1</sup>.

**1-benzyl-1H-1,2,3-triazole-4-carbaldehyde (5a):** Yield 82%, white solid, mp 90-91 °C, <sup>1</sup>H NMR (400 MHz, CDCl<sub>3</sub>):  $\delta$  10.12 (s, 1H), 7.98 (s, 1H), 7.41-7.39 (m, 3H), 7.31-7.29 (m, 2H), 5.58 (s, 2H); <sup>13</sup>C NMR (150 MHz, CDCl<sub>3</sub>):  $\delta$  185.2, 148.2, 133.5, 129.6, 129.5, 128.6, 125.3, 54.8; IR (KBr) $\nu_{\max}$  3127, 3049, 2995, 2925, 2854, 2775, 1694, 1586, 1534, 1495, 1456, 1358, 1237, 1166, 1048 cm<sup>-1</sup>; HRMS (ESI) Calcd For C<sub>10</sub>H<sub>10</sub>N<sub>3</sub>O 188.0817 (M + H<sup>+</sup>); Found 188.0819.

**1-(4-methylbenzyl)-1H-1,2,3-triazole-4-carbaldehyde (5b):** Yield 78%, white solid, mp 77-78 °C, <sup>1</sup>H NMR (600 MHz, CDCl<sub>3</sub>):  $\delta$  10.11 (s, 1H), 7.96 (s, 1H), 7.20 (s, 4H), 5.54 (s, 2H), 2.36 (s, 3H); <sup>13</sup>C NMR (150 MHz, CDCl<sub>3</sub>):  $\delta$  185.3, 148.1,

139.6, 130.5, 130.2, 128.6, 125.2, 54.6, 21.4; IR (KBr) $\nu_{\max}$  3132, 3041, 2988, 2924, 2854, 2768, 1699, 1610, 1532, 1517, 1463, 1437, 1355, 1243, 1160, 1044  $\text{cm}^{-1}$ ; HRMS (ESI) Calcd For  $\text{C}_{11}\text{H}_{12}\text{N}_3\text{O}$  202.0975 ( $\text{M} + \text{H}^+$ ); Found 202.0975.

**1-(4-bromobenzyl)-1H-1,2,3-triazole-4-carbaldehyde (5c):** Yield 76%, white solid, mp 107-108 °C,  $^1\text{H}$  NMR (600 MHz,  $\text{CD}_2\text{Cl}_2$ ):  $\delta$  10.8 (s, 1H), 8.06 (s, 1H), 7.55 (d,  $J = 8.4$  Hz, 2H), 7.20 (d,  $J = 8.4$  Hz, 2H), 5.55 (s, 2H);  $^{13}\text{C}$  NMR (150 MHz,  $\text{CD}_2\text{Cl}_2$ ):  $\delta$  184.7, 148.1, 133.1, 133.0, 132.4, 130.1, 125.7, 125.6, 123.2, 53.2; IR (KBr) $\nu_{\max}$  3120, 3090, 3039, 2925, 2843, 2767, 1696, 1593, 1532, 1490, 1438, 1356, 1241, 1166, 1046  $\text{cm}^{-1}$ ; HRMS (ESI) Calcd For  $\text{C}_{10}\text{H}_9\text{BrN}_3\text{O}$  265.9924 ( $\text{M} + \text{H}^+$ ); Found 265.9909.

**1-(4-fluorobenzyl)-1H-1,2,3-triazole-4-carbaldehyde (5d):** Yield 78%, white solid, mp 73-74 °C,  $^1\text{H}$  NMR (400 MHz,  $\text{CDCl}_3$ ):  $\delta$  10.08 (s, 1H), 7.97 (s, 1H), 7.27-7.29 (m, 2H), 7.03-7.08 (m, 2H), 5.53 (s, 2H);  $^{13}\text{C}$  NMR (100 MHz,  $\text{CDCl}_3$ ):  $\delta$  185.1, 164.4, 161.9, 148.1, 130.5, 130.4, 129.5, 129.4, 125.3, 116.6, 116.4, 53.9; IR (KBr) $\nu_{\max}$  3139, 3120, 3053, 2956, 2925, 2870, 1699, 1603, 1536, 1512, 1465, 1432, 1345, 1236, 1167, 1049  $\text{cm}^{-1}$ ; HRMS (ESI) Calcd For  $\text{C}_{10}\text{H}_9\text{FN}_3\text{O}$  206.0724 ( $\text{M} + \text{H}^+$ ); Found 206.0722.

**1-allyl-1H-1,2,3-triazole-4-carbaldehyde (5e):** Yield 72%, white solid, mp 71-72 °C,  $^1\text{H}$  NMR (600 MHz,  $\text{CDCl}_3$ ):  $\delta$  10.08 (s, 1H), 8.13 (s, 1H), 6.01 (s, 1H), 5.39-5.32 (m, 2H), 5.03 (s, 2H);  $^{13}\text{C}$  NMR (150 MHz,  $\text{CDCl}_3$ ):  $\delta$  185.0, 147.9, 130.2, 125.4, 121.4, 53.1; IR (KBr) $\nu_{\max}$  3132, 3029, 2924, 2871, 1699, 1615, 1532, 1517, 1462, 1436, 1355, 1243, 1160, 1044  $\text{cm}^{-1}$ ; MS (ESI) Calcd For  $\text{C}_6\text{H}_7\text{N}_3\text{ONa}$  160.0481 ( $\text{M} + \text{Na}^+$ ); Found 160.0816.

**Ethyl 2-(4-formyl-1H-1,2,3-triazol-1-yl)acetate (5f):** Yield 68%, white solid, mp 65-66 °C,  $^1\text{H}$  NMR (400 MHz,  $\text{CDCl}_3$ ):  $\delta$  10.15 (s, 1H), 8.28 (s, 1H), 5.24 (s, 2H), 4.29 (br s, 2H), 1.31 (br s, 3H);  $^{13}\text{C}$  NMR (100 MHz,  $\text{CDCl}_3$ ):  $\delta$  185.0, 165.6, 148.2, 127.0, 63.1, 51.2, 14.2; IR (KBr) $\nu_{\max}$  3132, 3062, 2997, 2959, 2849, 2781, 1745, 1703, 1540, 1478, 1416, 1397, 1379, 1249, 1170, 1049  $\text{cm}^{-1}$ ; HRMS (ESI) Calcd For  $\text{C}_7\text{H}_{10}\text{N}_3\text{O}_3$  184.0717 ( $\text{M} + \text{H}^+$ ); Found 184.0715.

**Table 6** Crystal Data and Structure Refinement for Compound **4f** and **8c**

| Entry | Identification code   | Compound <b>4f</b>                                                       | Compound <b>8c</b>                                                         |
|-------|-----------------------|--------------------------------------------------------------------------|----------------------------------------------------------------------------|
| 01    | Empirical formula     | C7 H11 N3 O3                                                             | C23 H18 Br N5                                                              |
| 02    | Formula weight        | 185.19                                                                   | 444.32                                                                     |
| 03    | Temperature           | 296(2) K                                                                 | 296(2) K                                                                   |
| 04    | Wavelength            | 0.71073                                                                  | 0.71073                                                                    |
| 05    | Radiation type        | Mo K $\alpha$                                                            | Mo K $\alpha$                                                              |
| 06    | Radiation source      | Fine-focus sealed tube                                                   | Fine-focus sealed tube                                                     |
| 07    | Crystal system        | monoclinic                                                               | orthorhombic                                                               |
| 08    | Space group           | P 2 <sub>1</sub> /n                                                      | P b c a                                                                    |
| 09    | Cell length           | a 7.9591(4) b 4.8417(3) c<br>23.7648(14)                                 | a 10.5296(11) b 17.3251(18) c<br>22.405(2)                                 |
| 10    | Cell Angle            | $\alpha$ 90.0 $\beta$ 94.296(5) $\delta$ 90.0                            | $\alpha$ 90.0 $\beta$ 90.00 $\delta$ 90.0                                  |
| 11    | Cell Volume           | 913.21(9)                                                                | 4087.3(7)                                                                  |
| 12    | Density               | 1.347                                                                    | 1.444                                                                      |
| 13    | Completeness to theta | 25.25° / 100%                                                            | 26.61° / 98.4%                                                             |
| 14    | Absorption correction | multi-scan                                                               | multi-scan                                                                 |
| 15    | Refinement method     | Full-matrix least-squares on F <sup>2</sup>                              | Full-matrix least-squares on F <sup>2</sup>                                |
| 16    | Index ranges          | -10 $\leq$ h $\leq$ 10, -6 $\leq$ k $\leq$ 3, -<br>28 $\leq$ l $\leq$ 29 | -11 $\leq$ h $\leq$ 13, -21 $\leq$ k $\leq$ 21, -<br>26 $\leq$ l $\leq$ 27 |
| 17    | Reflection number     | 1648                                                                     | 4219                                                                       |
| 18    | Theta range           | 3.44 - 25.25                                                             | 1.82-26.61                                                                 |
| 19    | Cell formula units Z  | 4                                                                        | 8                                                                          |
| 20    | CCDC no               | 979591                                                                   | 1019691                                                                    |

<sup>1</sup>H NMR spectra of **4a**

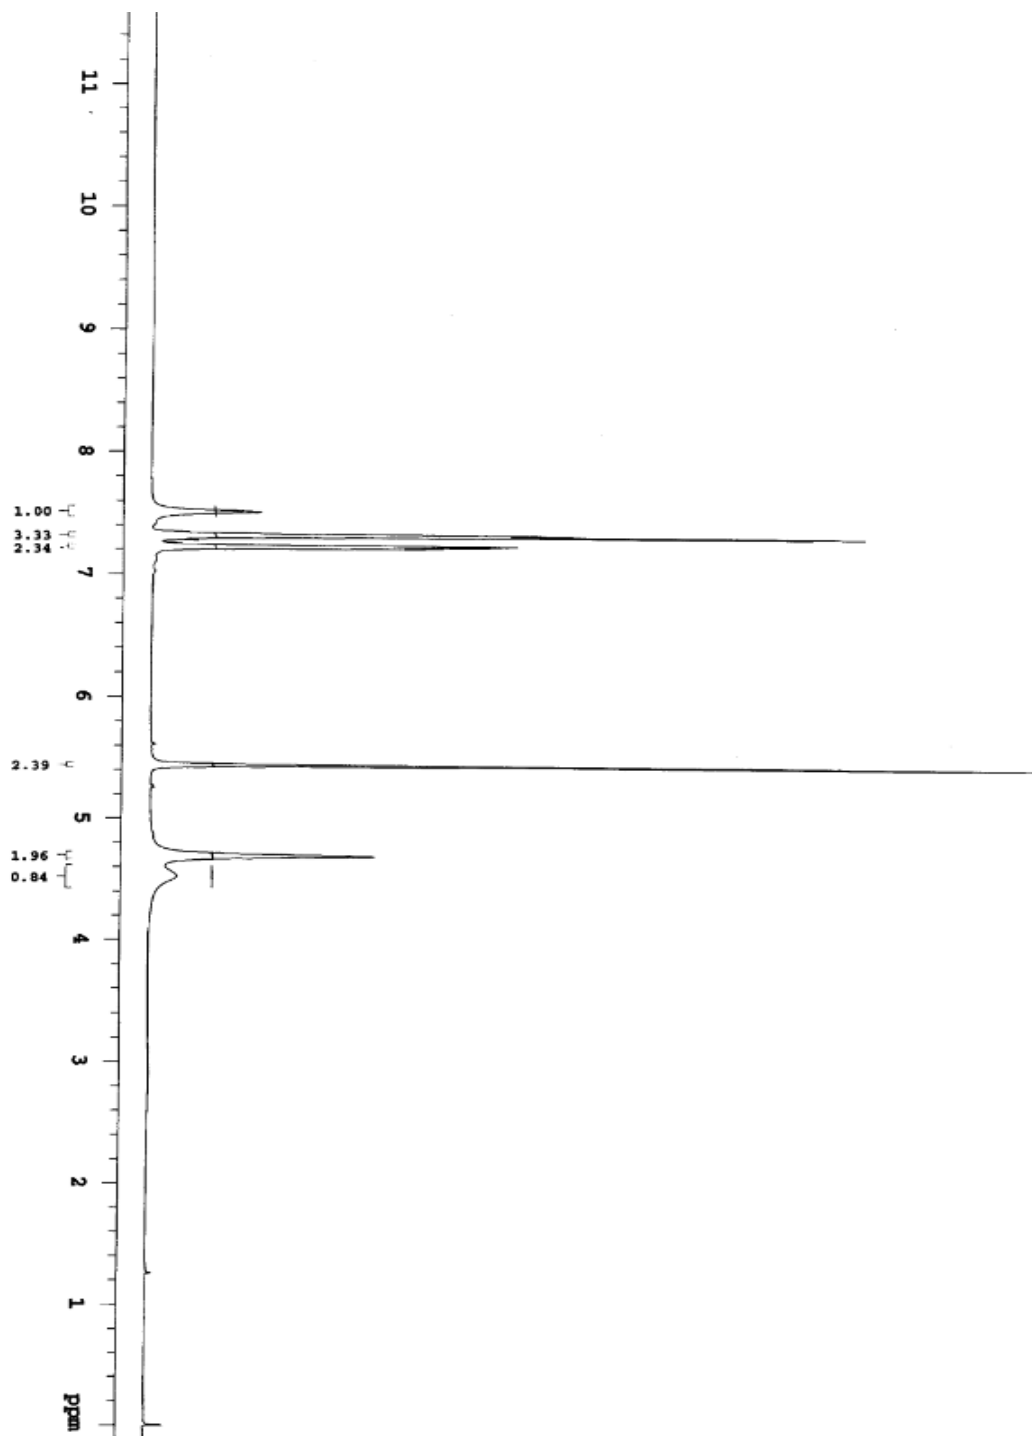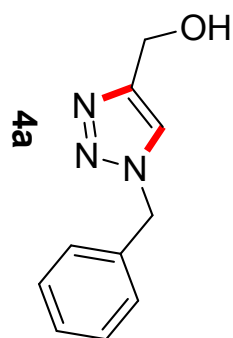

<sup>13</sup>C NMR spectra of **4a**

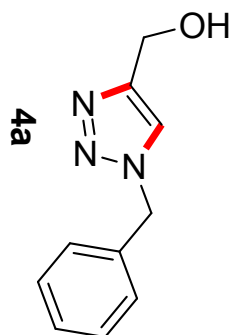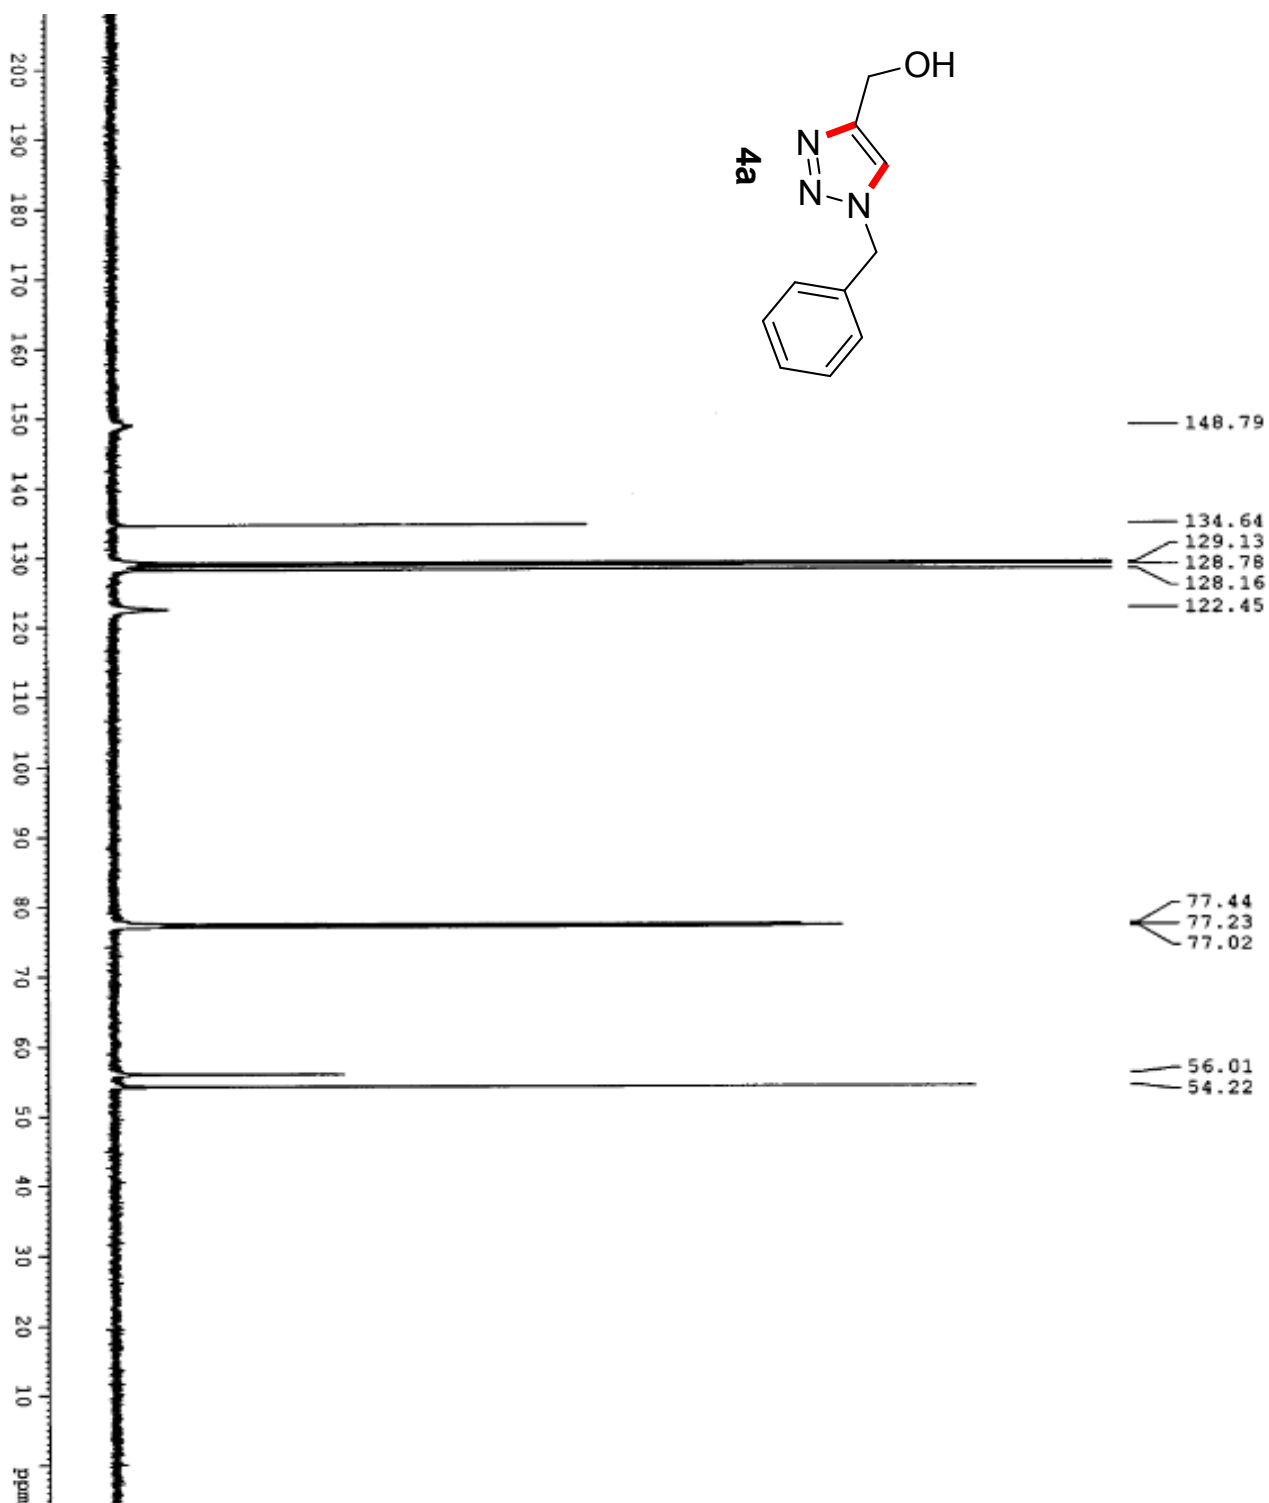

<sup>1</sup>H NMR spectra of **4b**

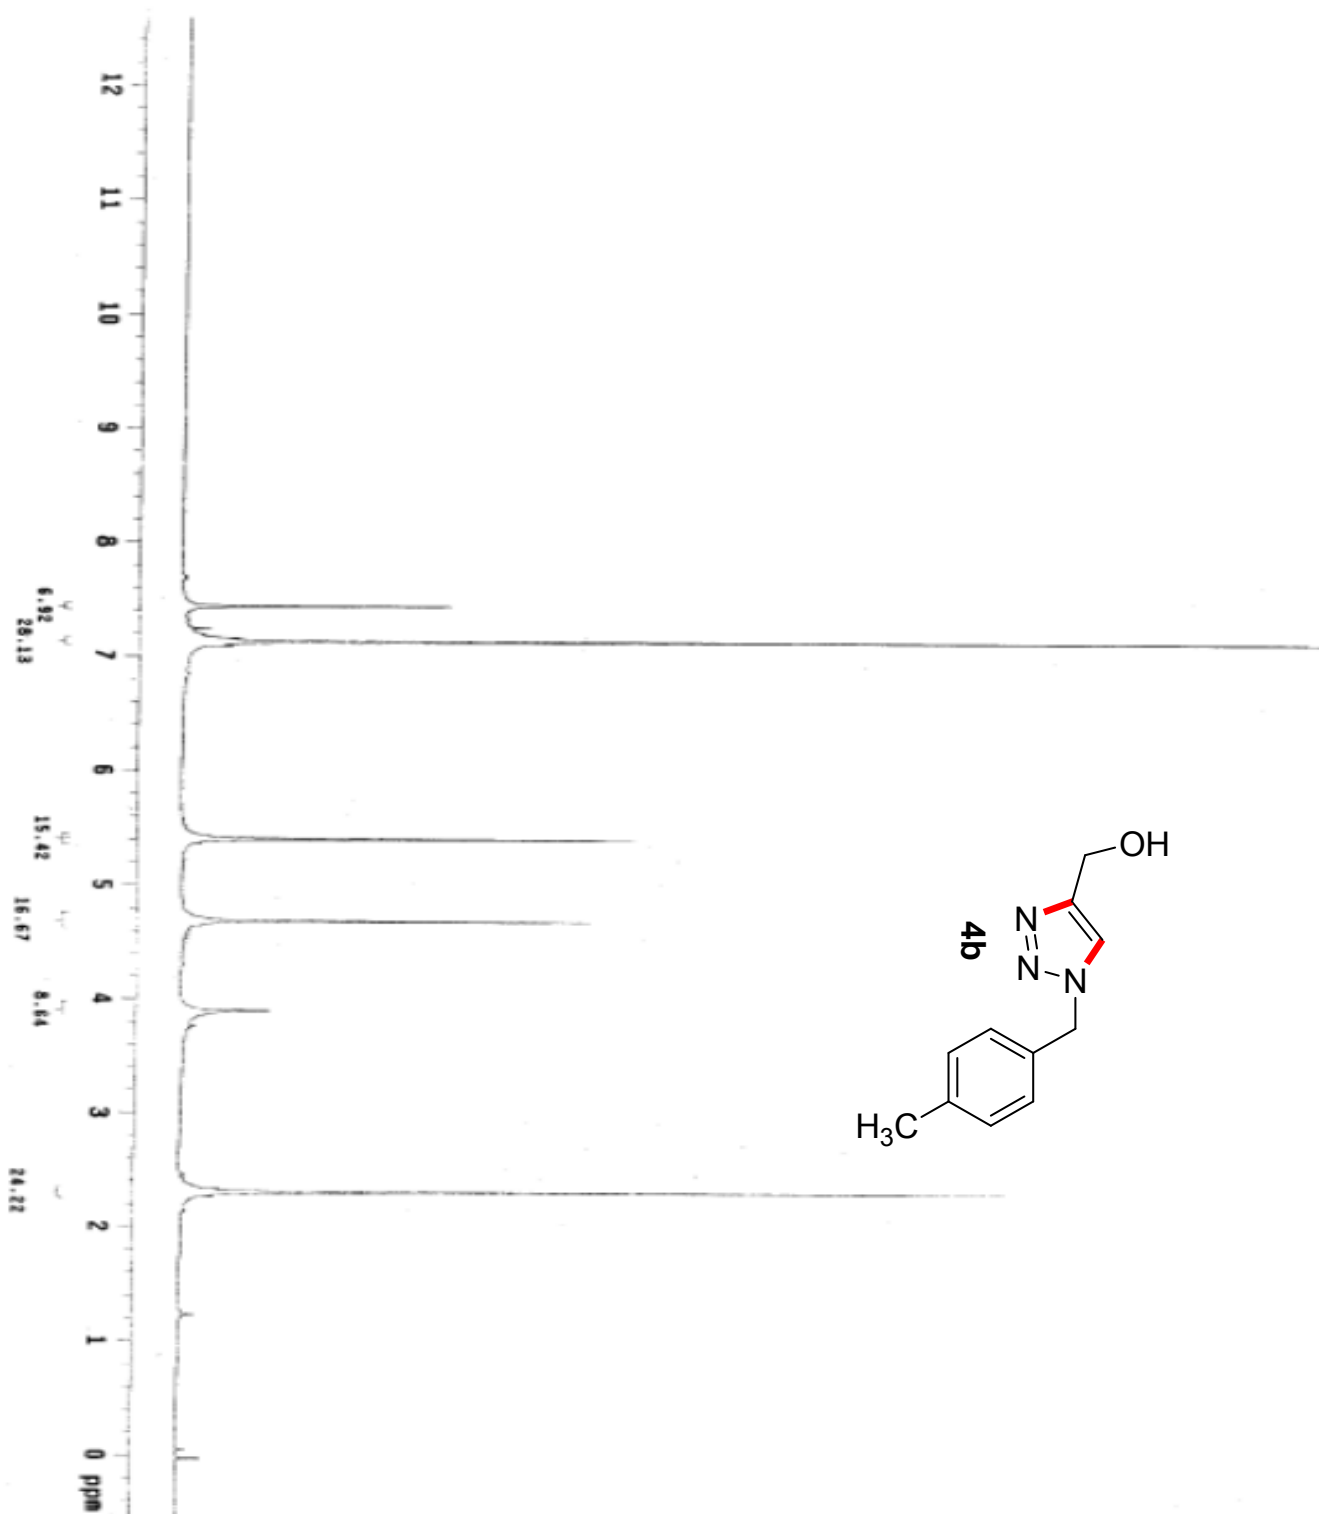

<sup>13</sup>C NMR spectra of **4b**

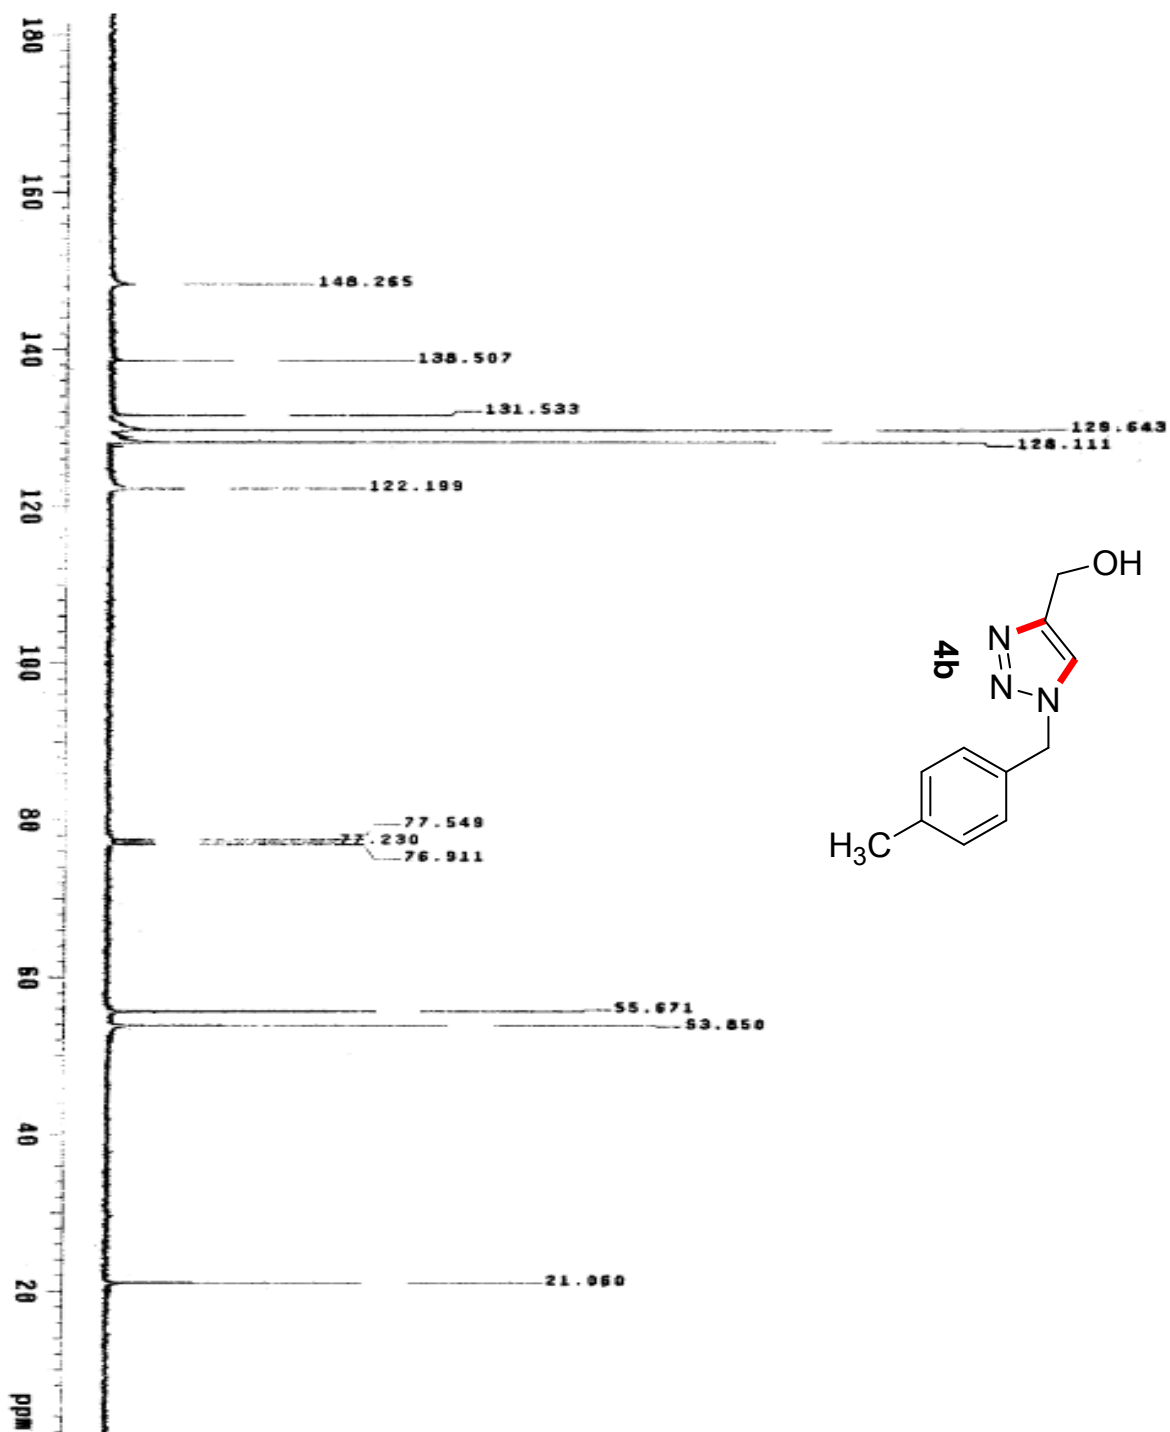



<sup>1</sup>H NMR spectra of 4c

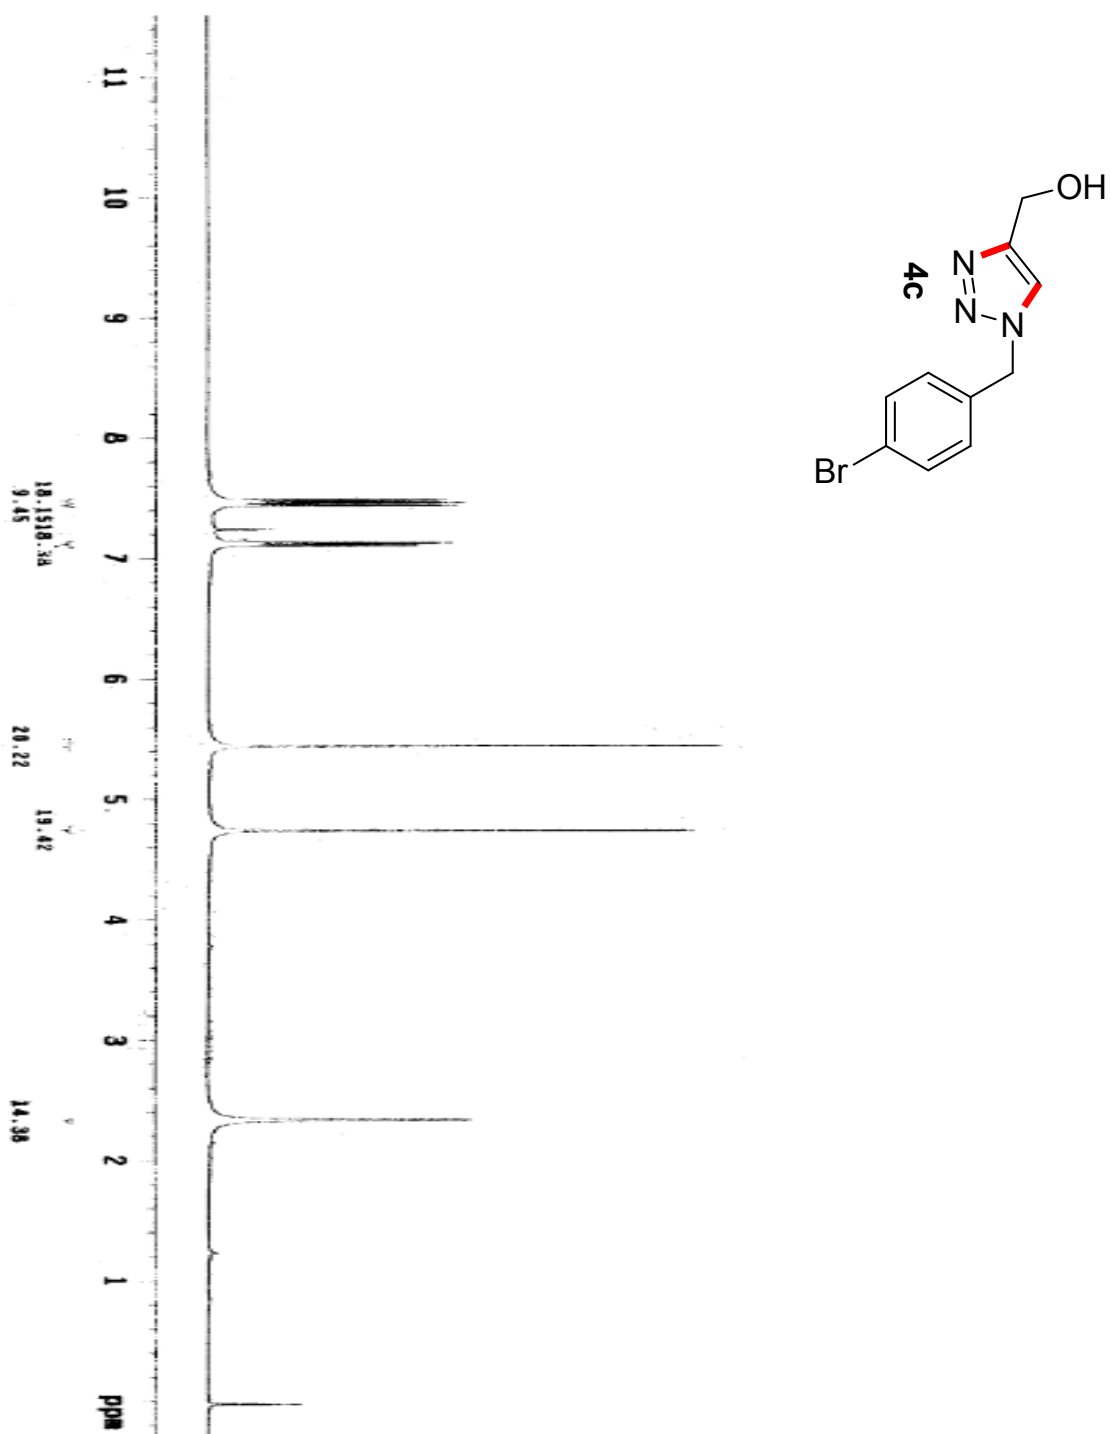

<sup>13</sup>C NMR spectra of 4c

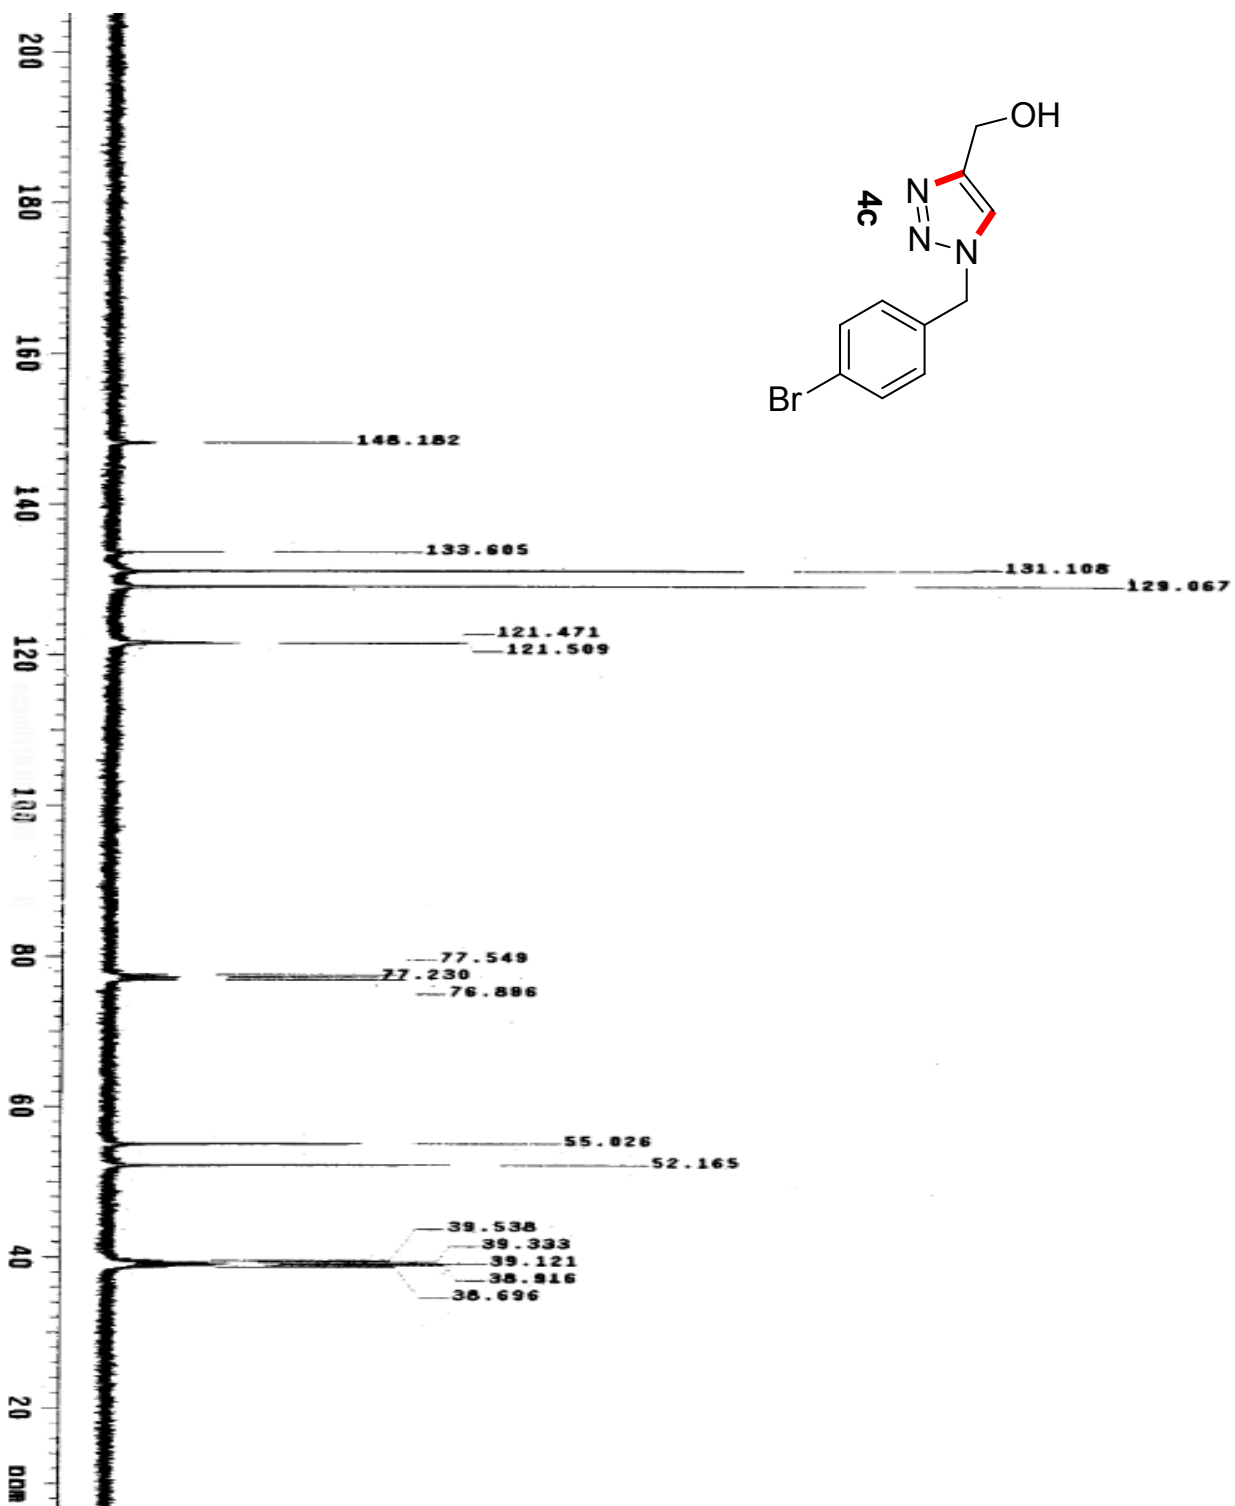

<sup>1</sup>H NMR spectra of **4d**

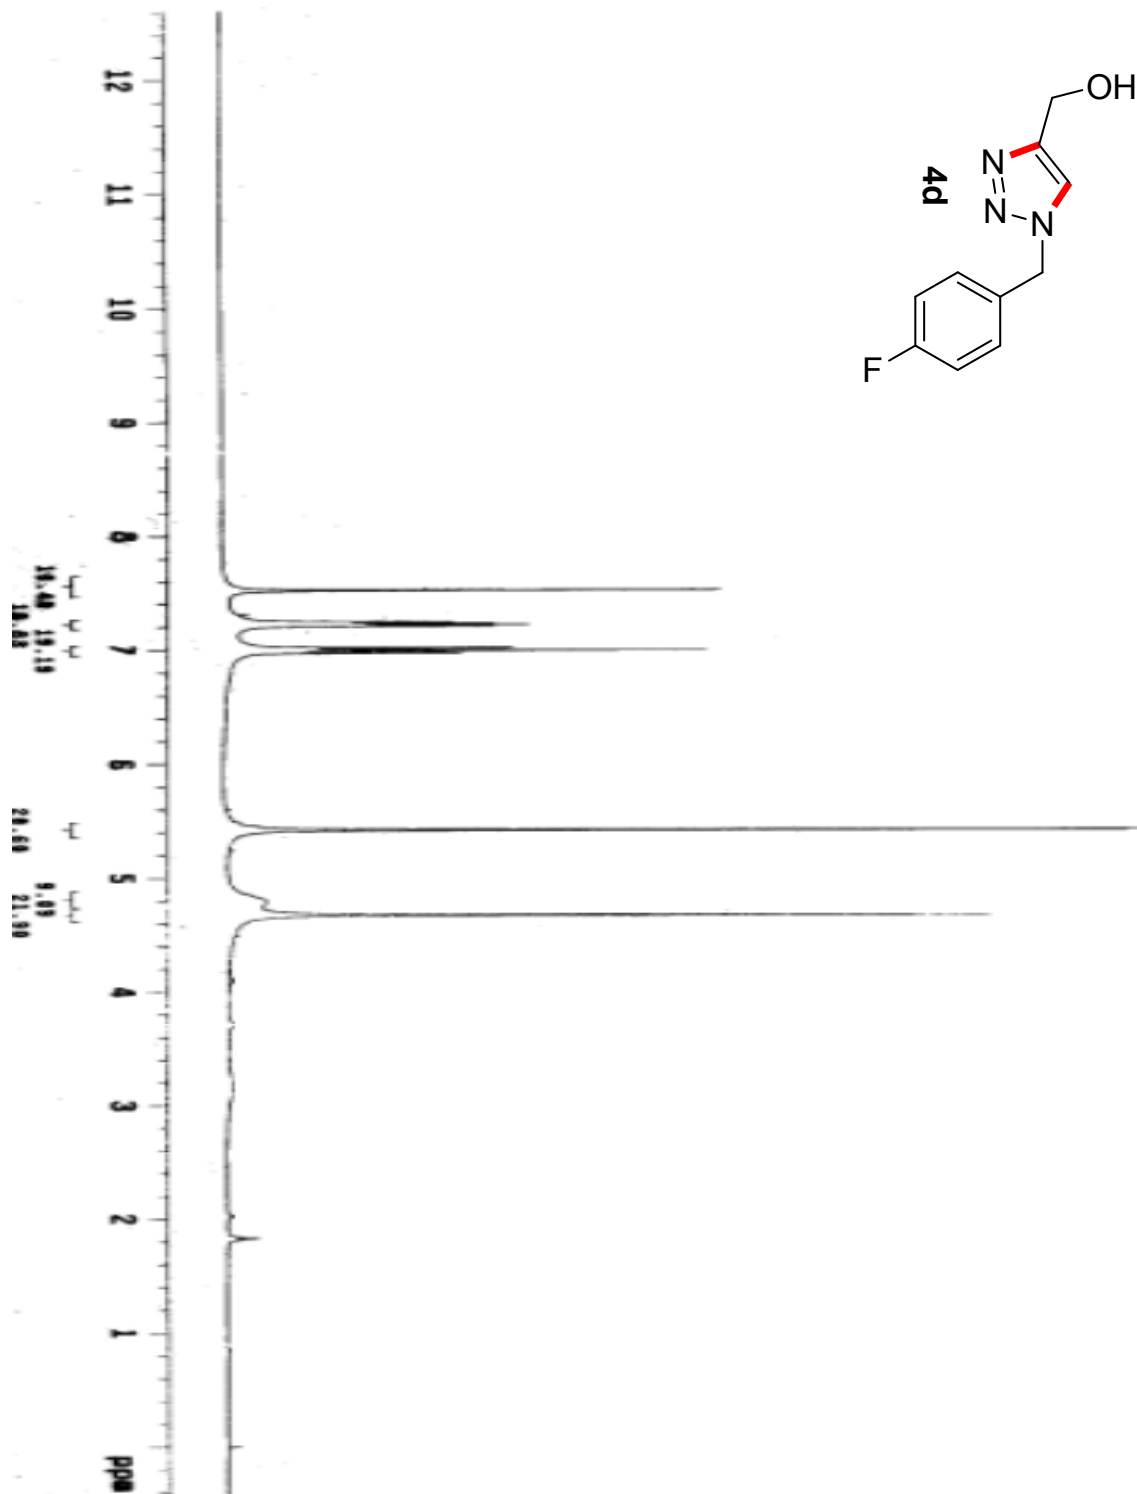

<sup>13</sup>C NMR spectra of 4d

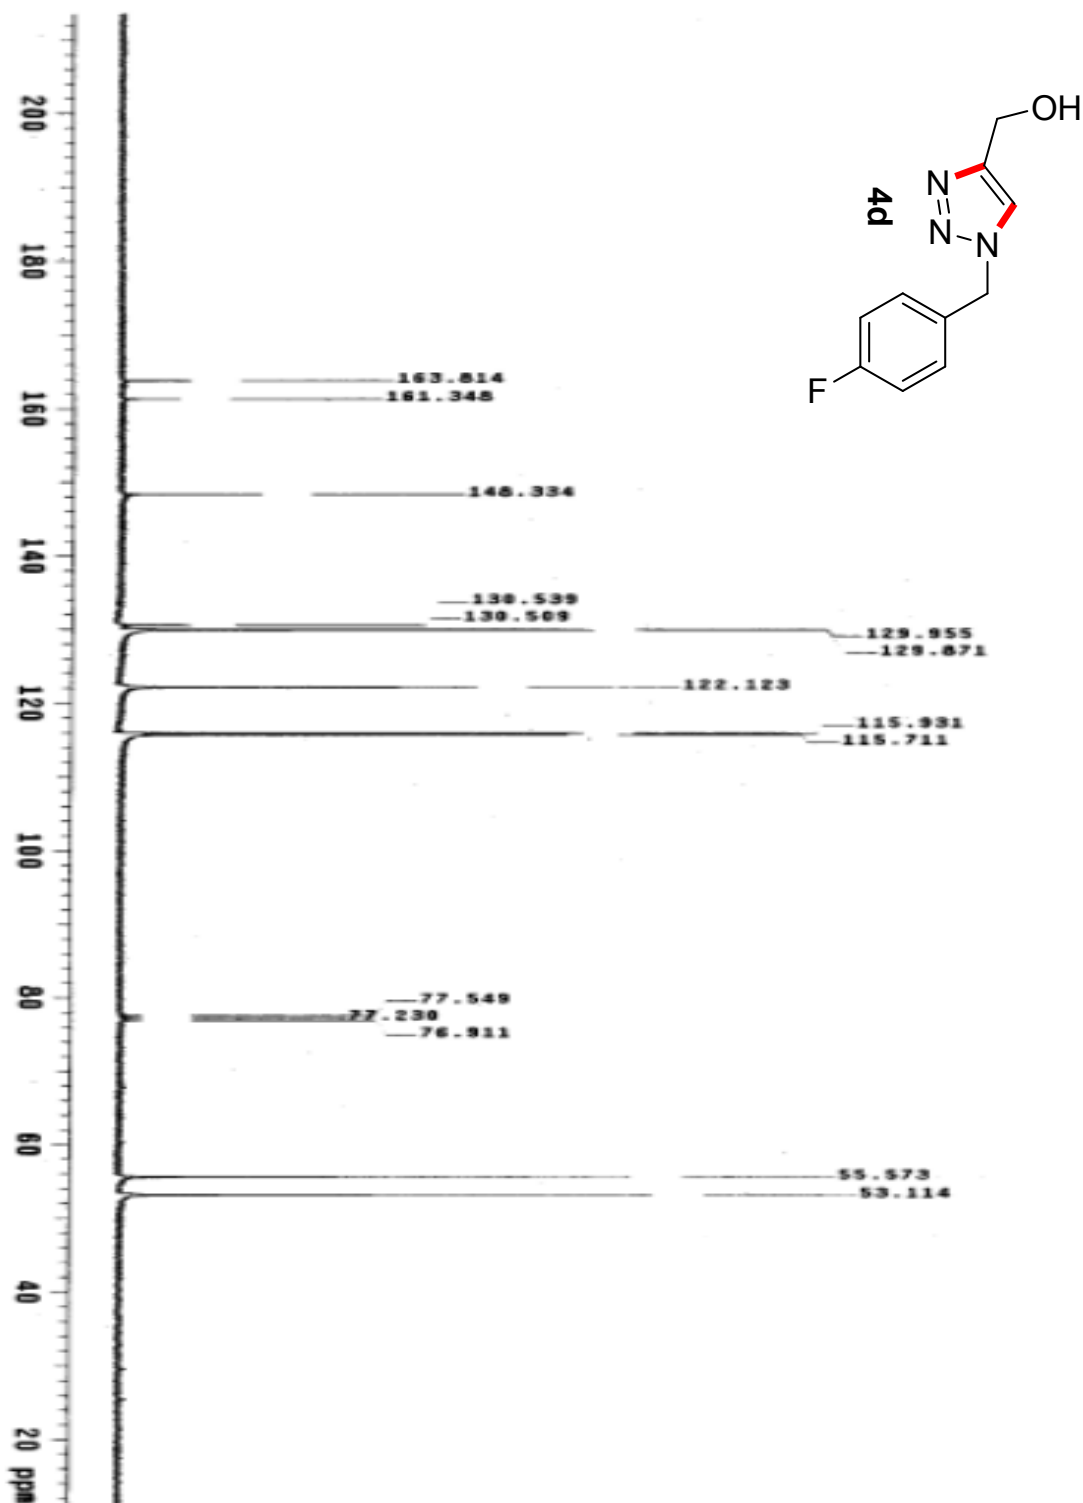

<sup>1</sup>H NMR spectra of 4e

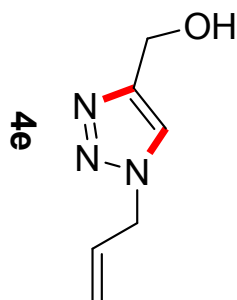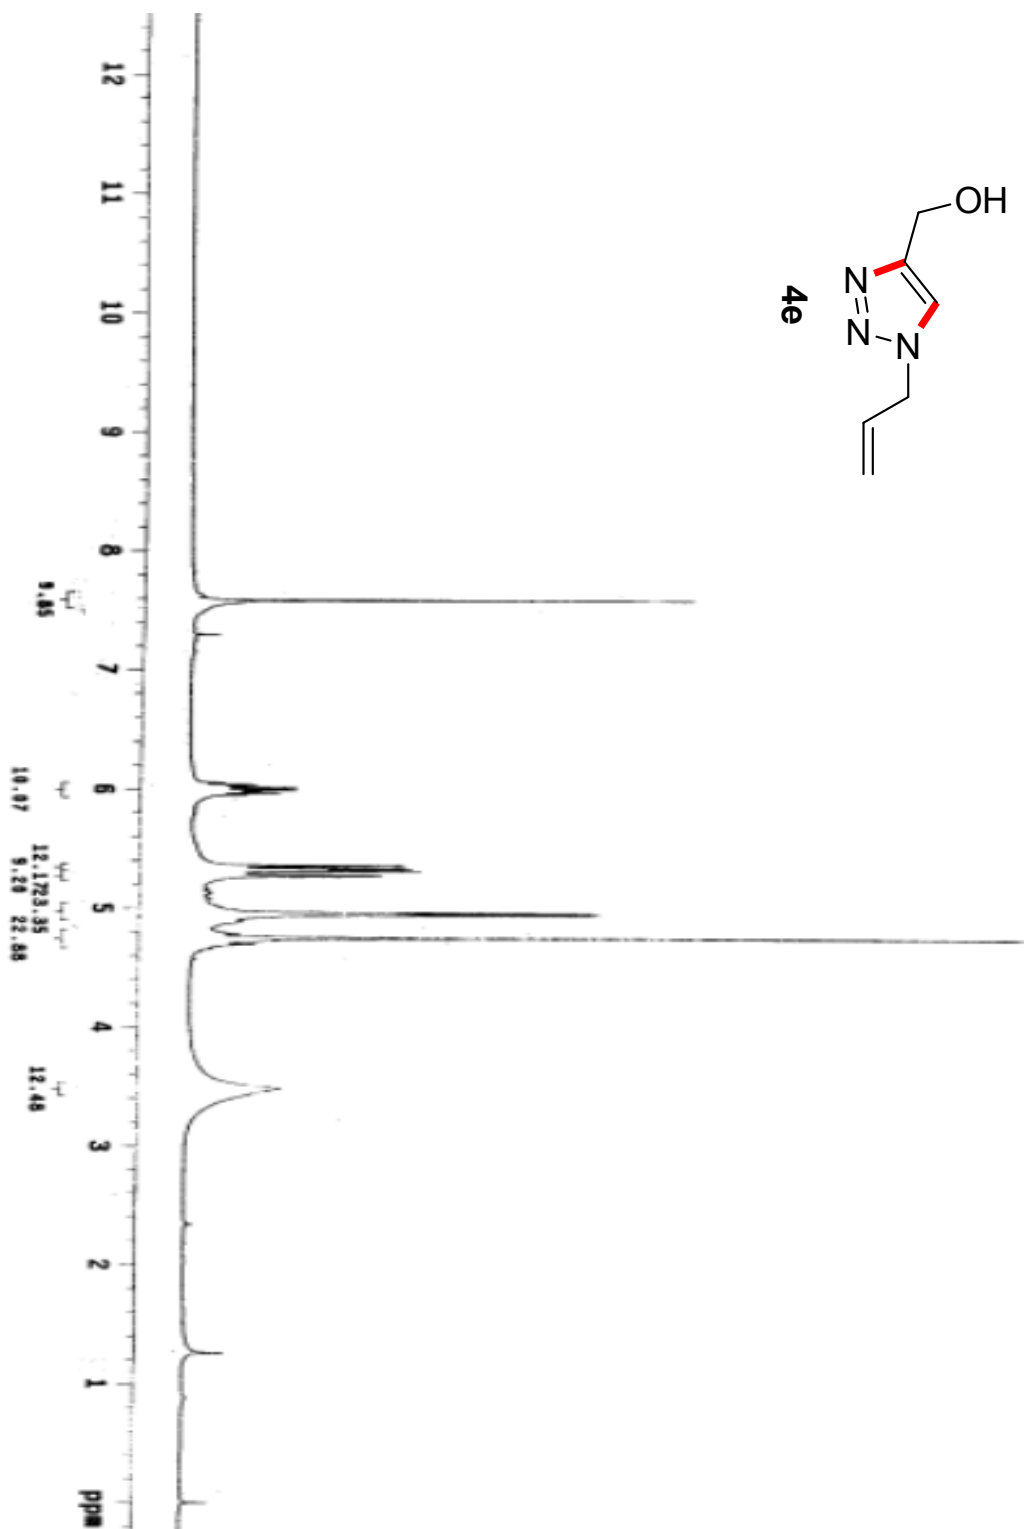

<sup>13</sup>C NMR spectra of 4e

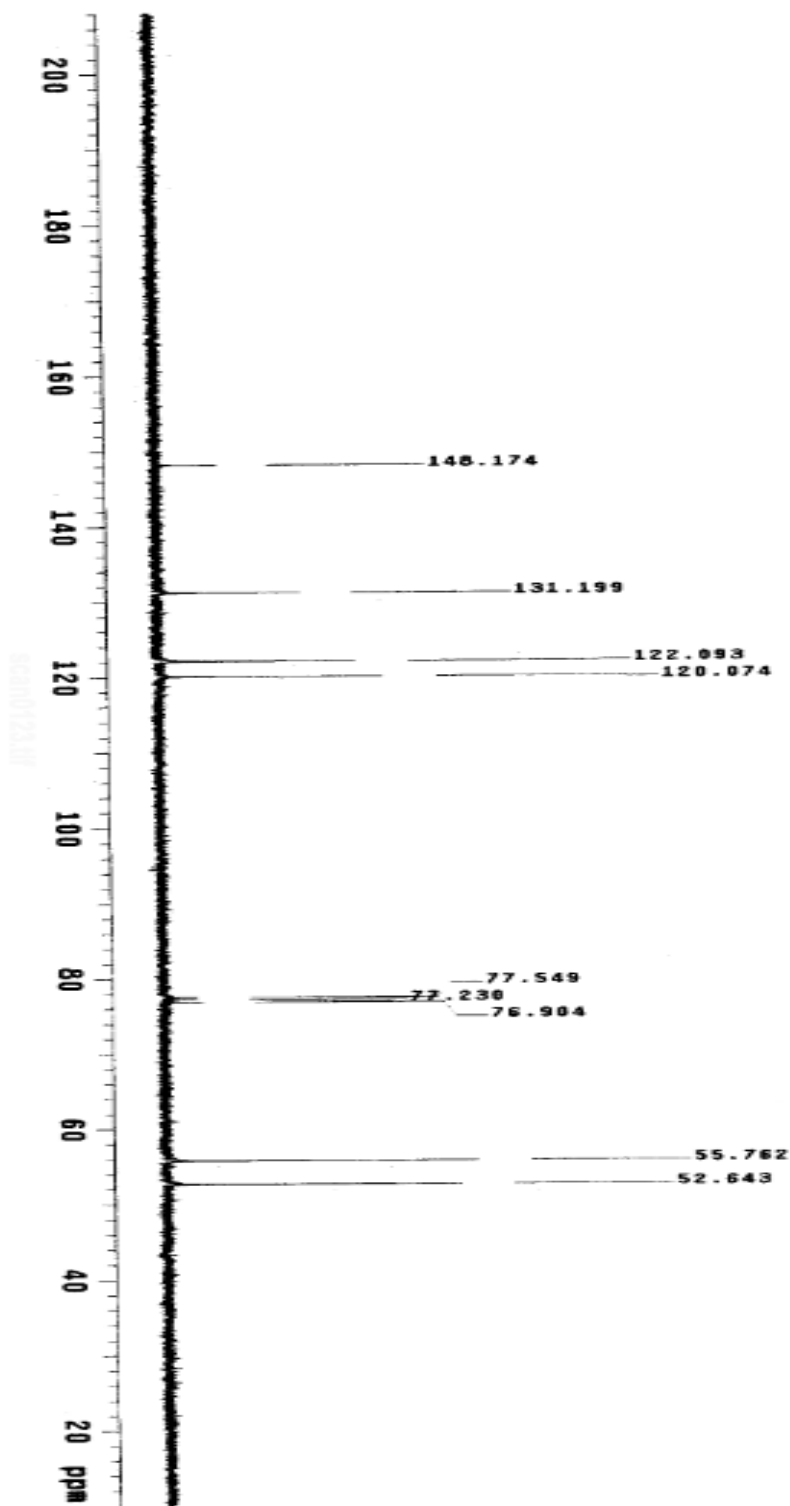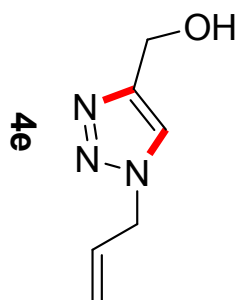

<sup>1</sup>H NMR spectra of 4f

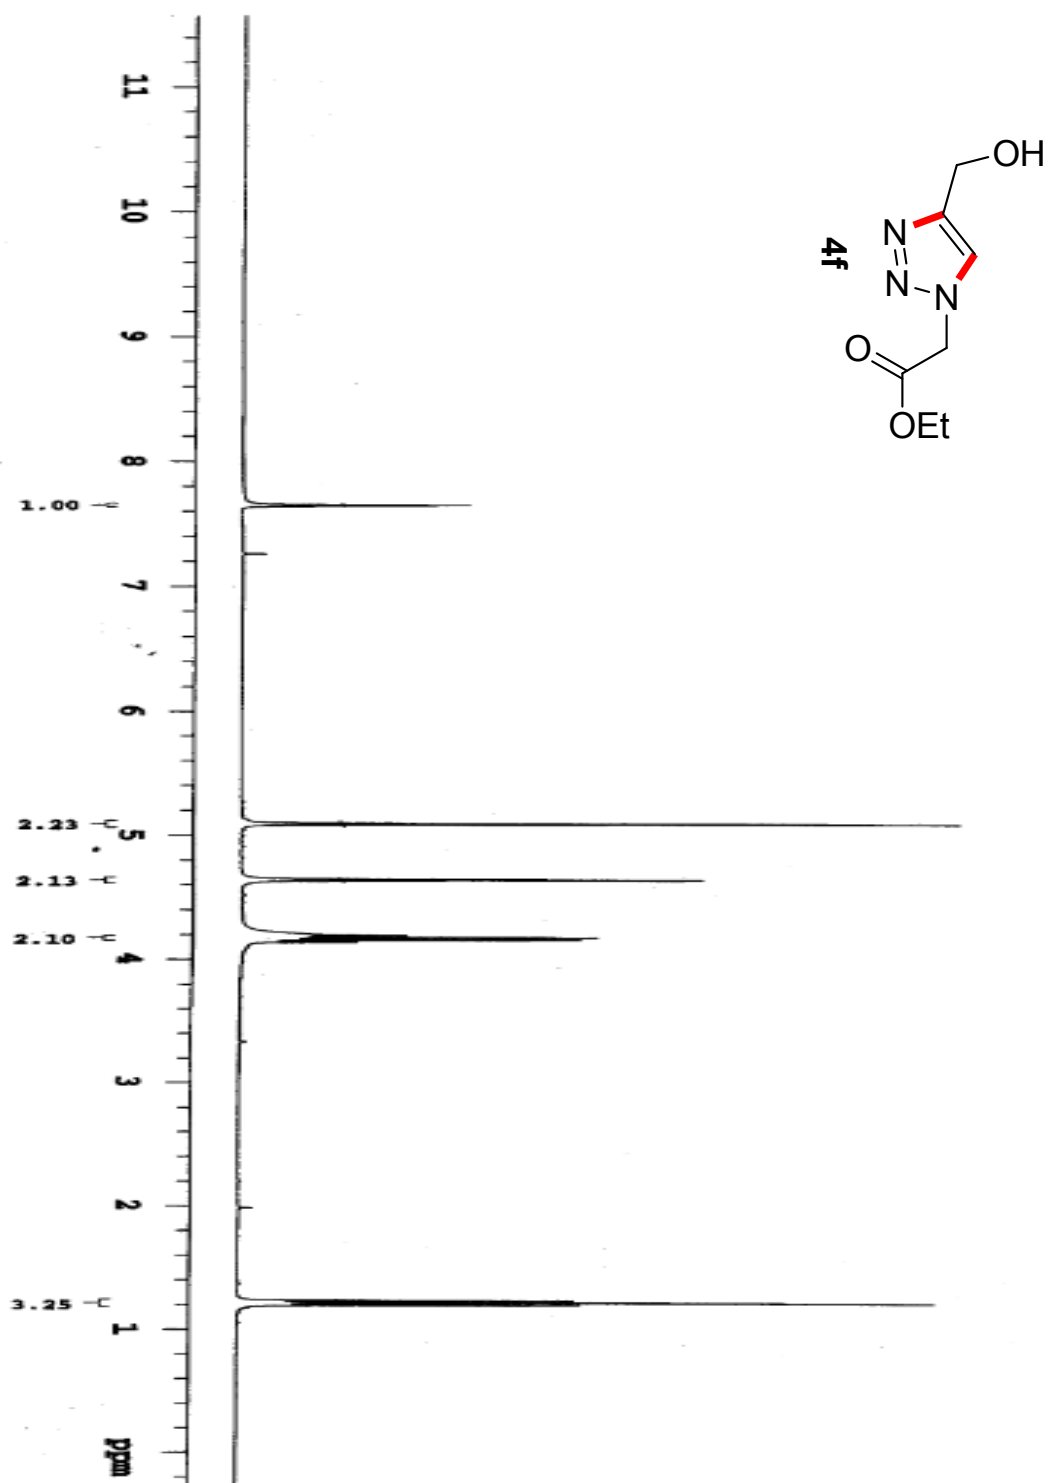

<sup>13</sup>C NMR spectra of 4f

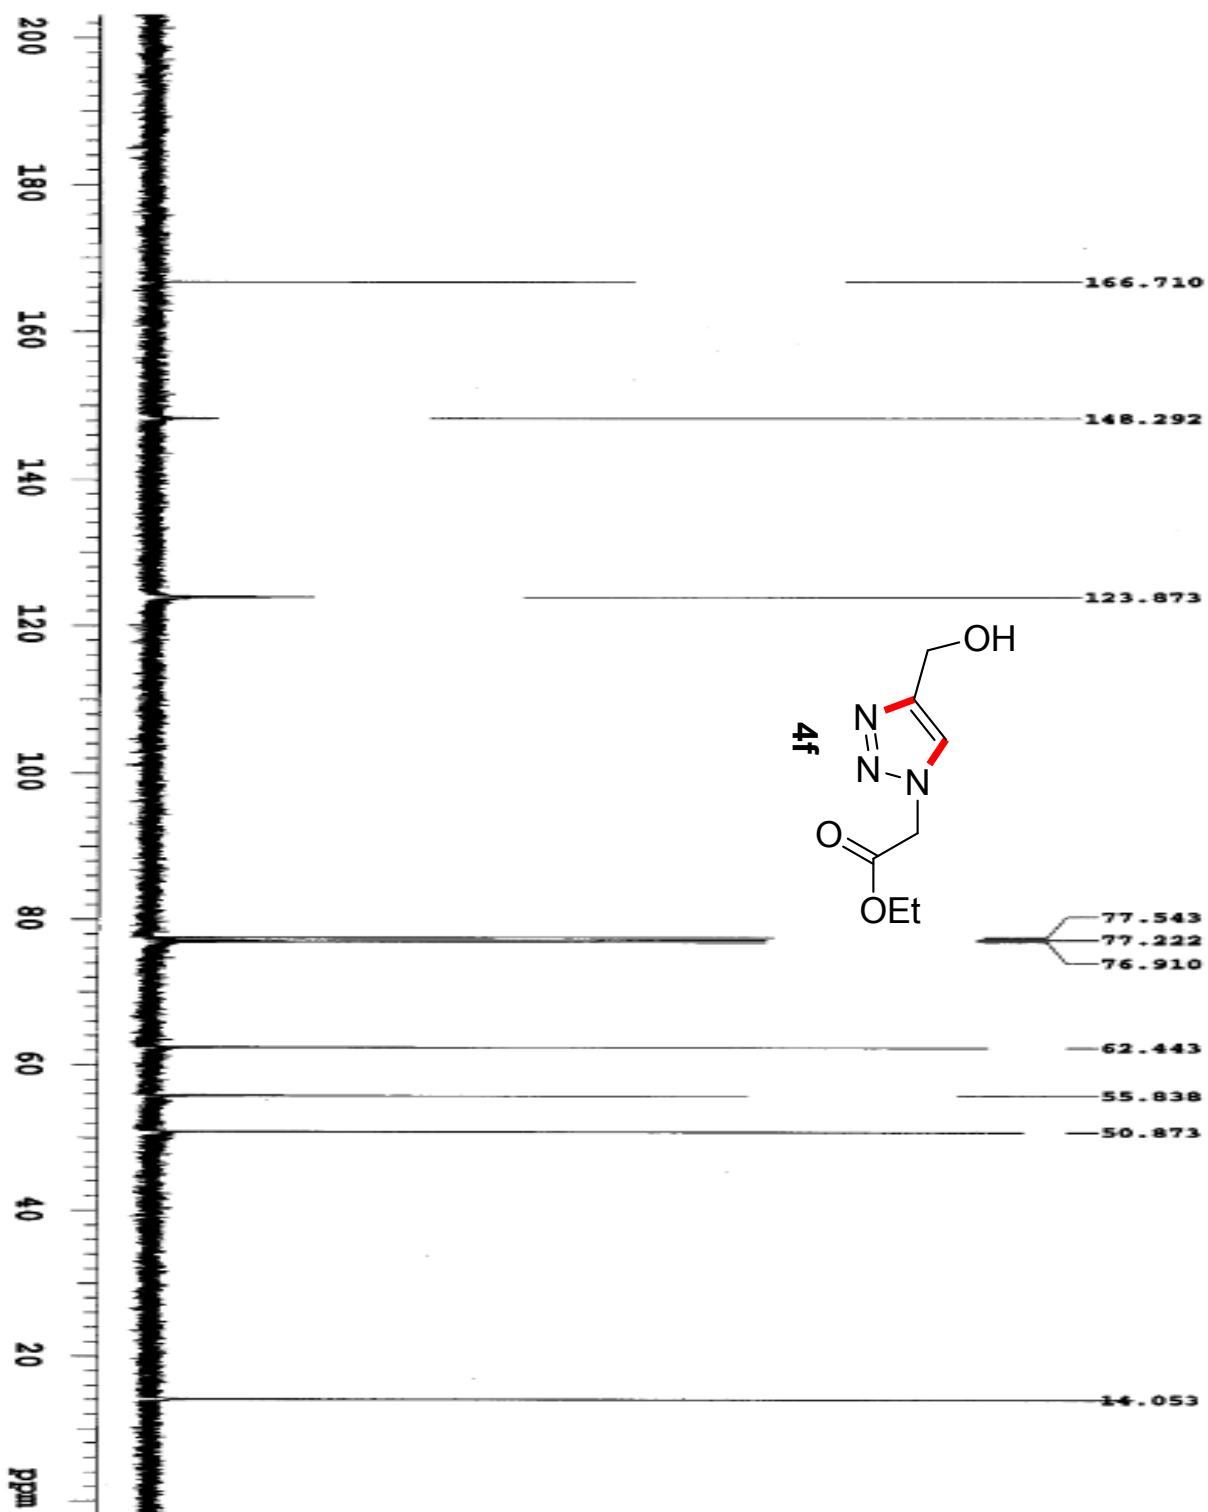



<sup>1</sup>H NMR spectra of 5a

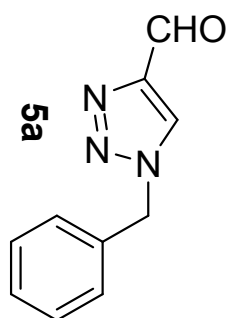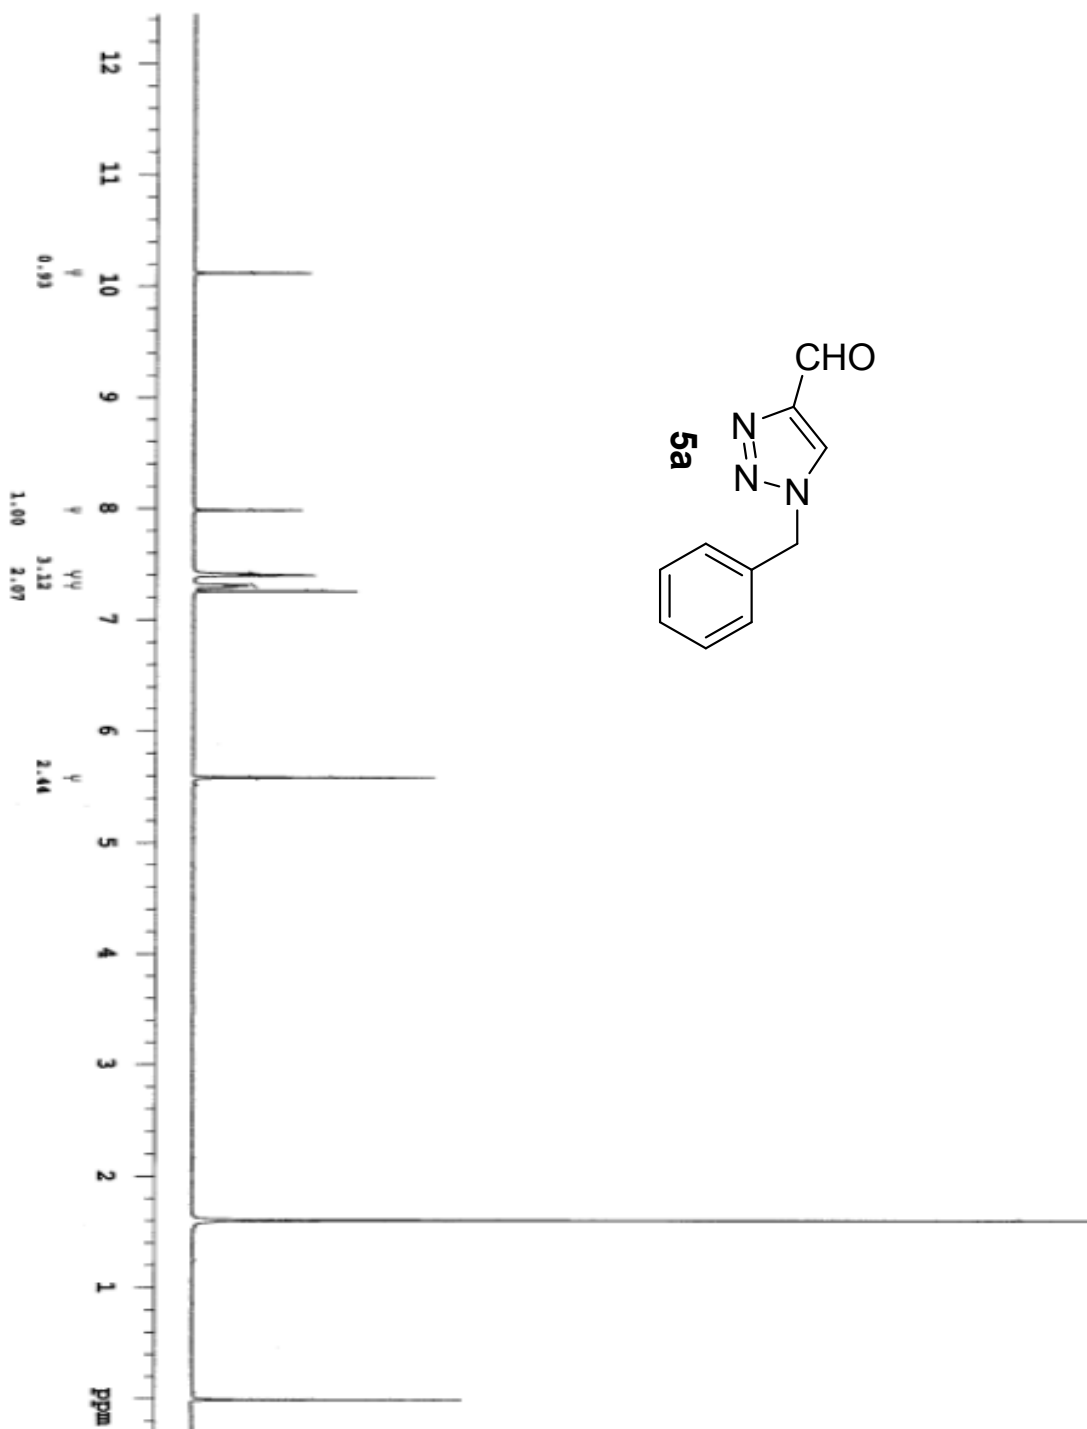

|                                                                                                                                  |                                 |                                                                 |                                                                                                            |
|----------------------------------------------------------------------------------------------------------------------------------|---------------------------------|-----------------------------------------------------------------|------------------------------------------------------------------------------------------------------------|
| <b>PULSE PROGRAM</b><br>Relax. delay 1.000 sec<br>Pulse 45.0 degrees<br>Acq. time 2.561 sec<br>Width 6398.0 Hz<br>32 repetitions | <b>OBSERVE</b> 'H', 399.8509634 | <b>DATA PROCESSING</b><br>FT size 32768<br>Total time 1 minutes | <b>ALD-PP-CNO-85</b><br>Solvent: CDCl3<br>Temp. 25.0 C / 298.1 K<br>Operator: dhan<br>Mercury-400 1170-MHz |
|----------------------------------------------------------------------------------------------------------------------------------|---------------------------------|-----------------------------------------------------------------|------------------------------------------------------------------------------------------------------------|

<sup>13</sup>C NMR spectra of 5a

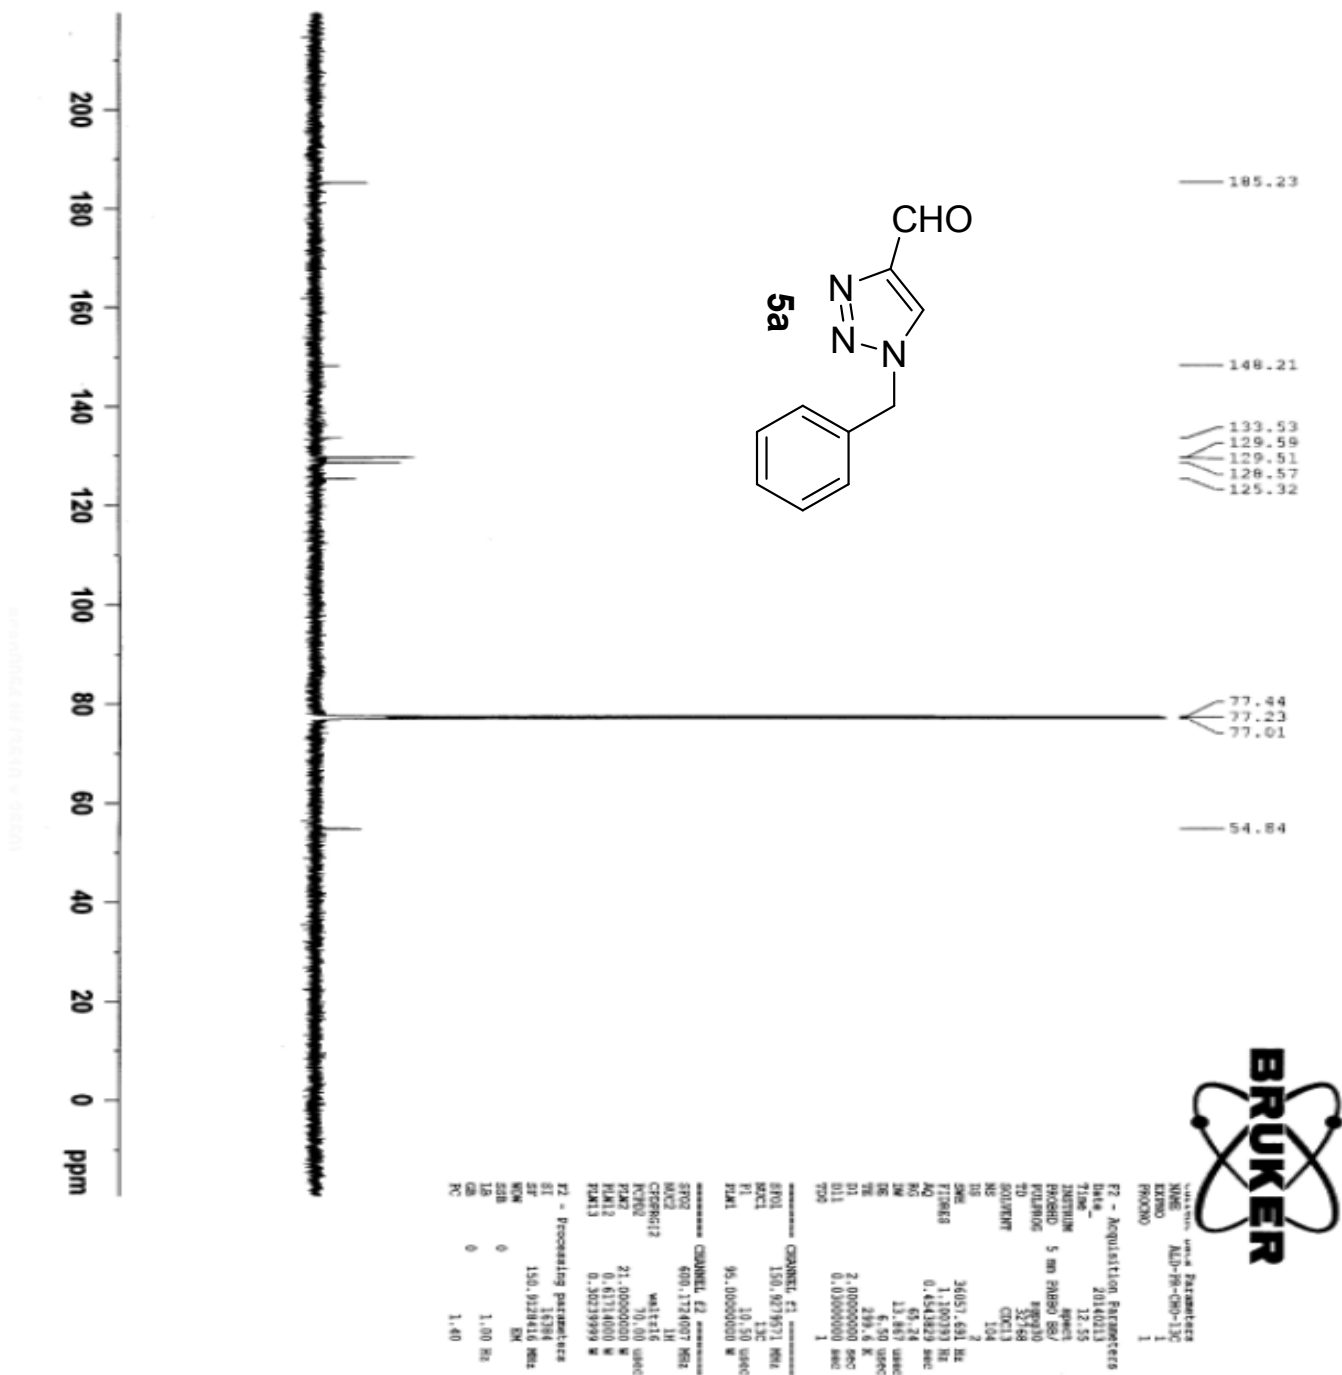

HRMS spectra of 5a

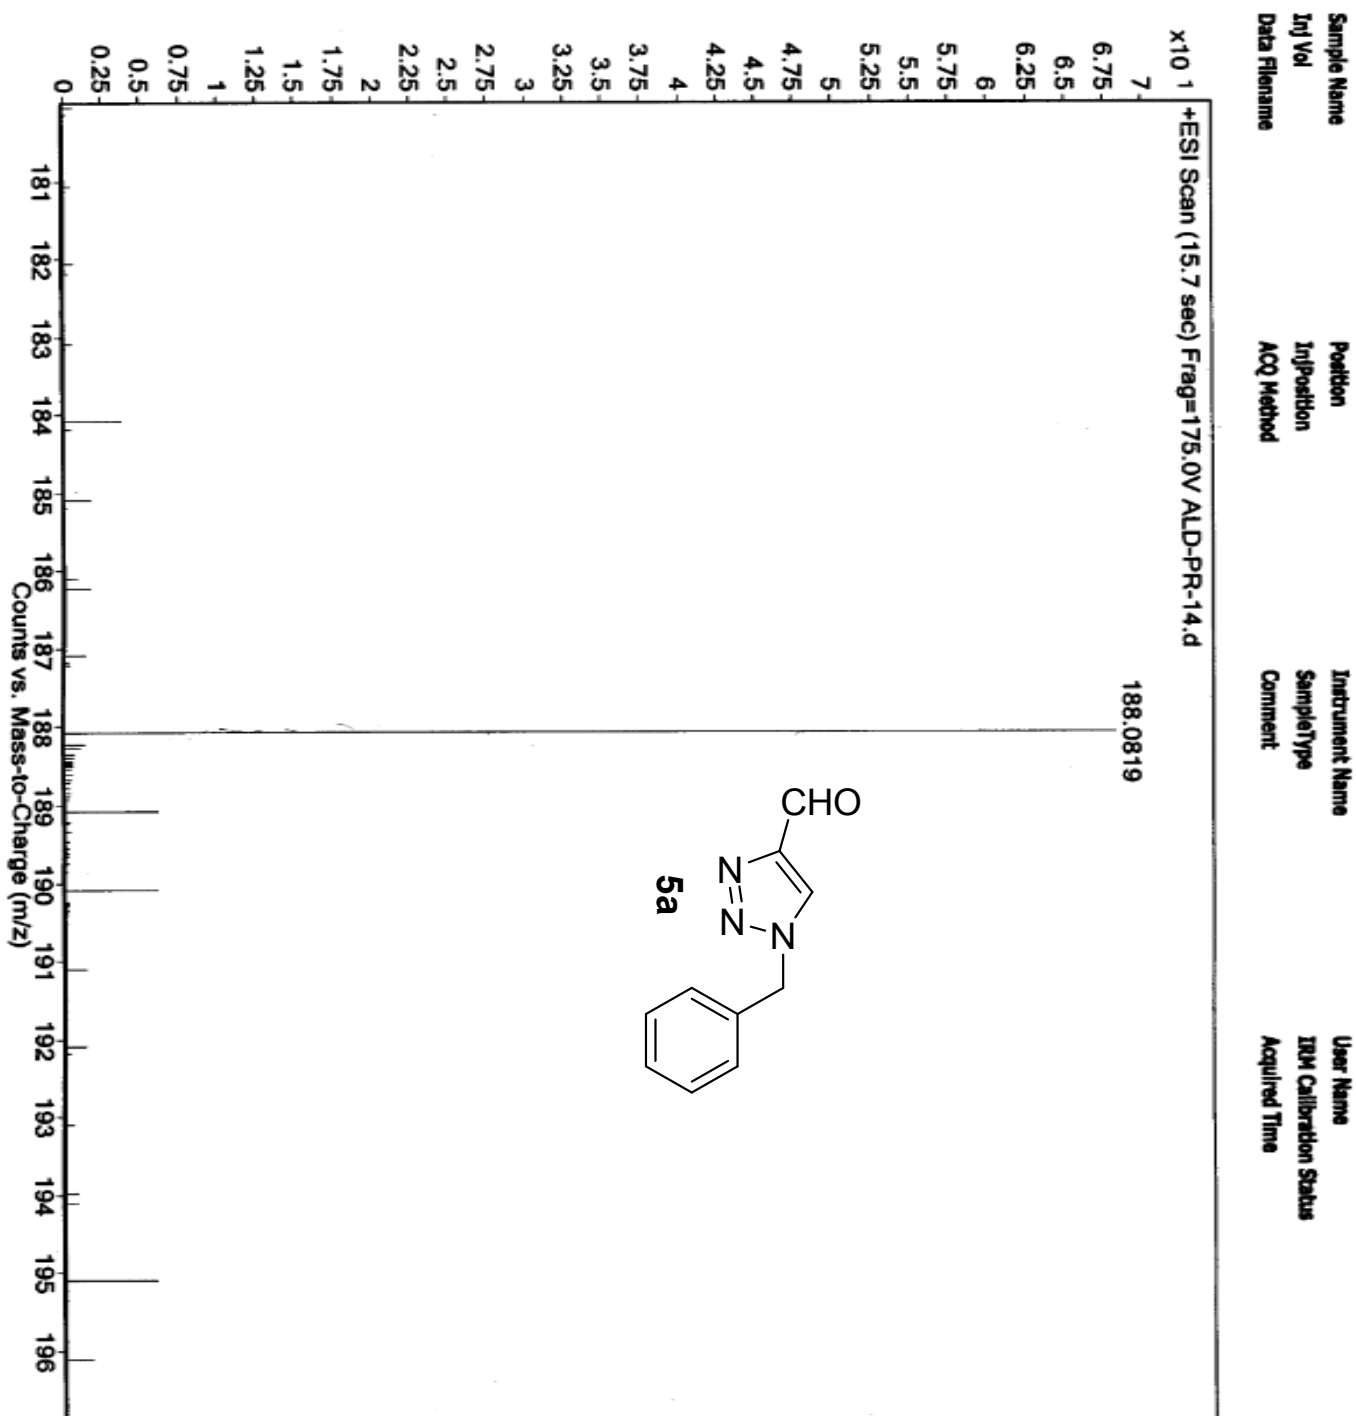

<sup>1</sup>H NMR spectra of **5b**

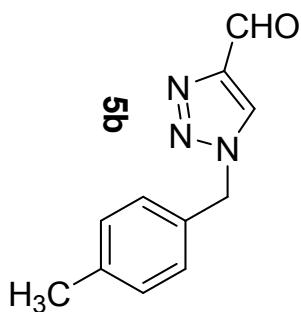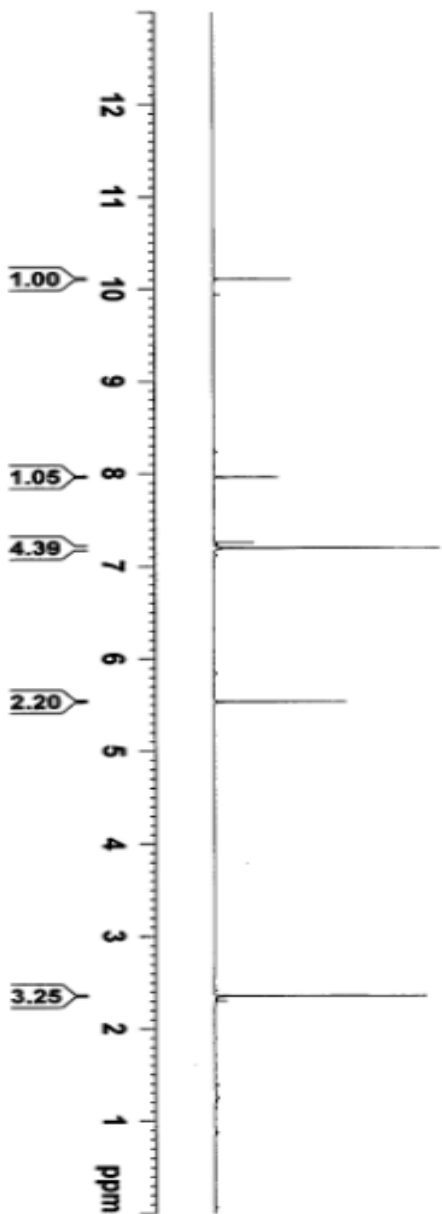

Current Data Parameters  
 NAME ALD-FR-2-1H  
 EXNO 1  
 PROCNO 1

F2 - Acquisition Parameters  
 Date\_ 20111216  
 Time 13:50  
 INSTRUM spect  
 PROBO 5 mm PABO BB/  
 PULPROG zgpg30  
 TD 32768  
 SFO 400.144  
 SOLVENT CDCl3  
 NS 16  
 DS 2  
 SWH 12019.230 Hz  
 FIDRES 0.1366790 Hz  
 AQ 1.3531488 sec  
 NU 34.94  
 DW 41.600 usec  
 DE 6.50 usec  
 TE 296.5 K  
 D1 1.00000000 sec  
 TDO 1

===== CHANNEL f1 =====  
 SFO1 400.137043 MHz  
 NUC1 1H  
 P1 12.00 usec  
 PC 21.00000000 W

F2 - Processing parameters  
 SI 16384  
 SF 400.1370144 MHz  
 MHZ EM  
 SSB 0  
 LB 0 0.30 Hz  
 GB 0  
 PC 1.00

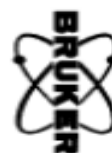

<sup>13</sup>C NMR spectra of **5b**

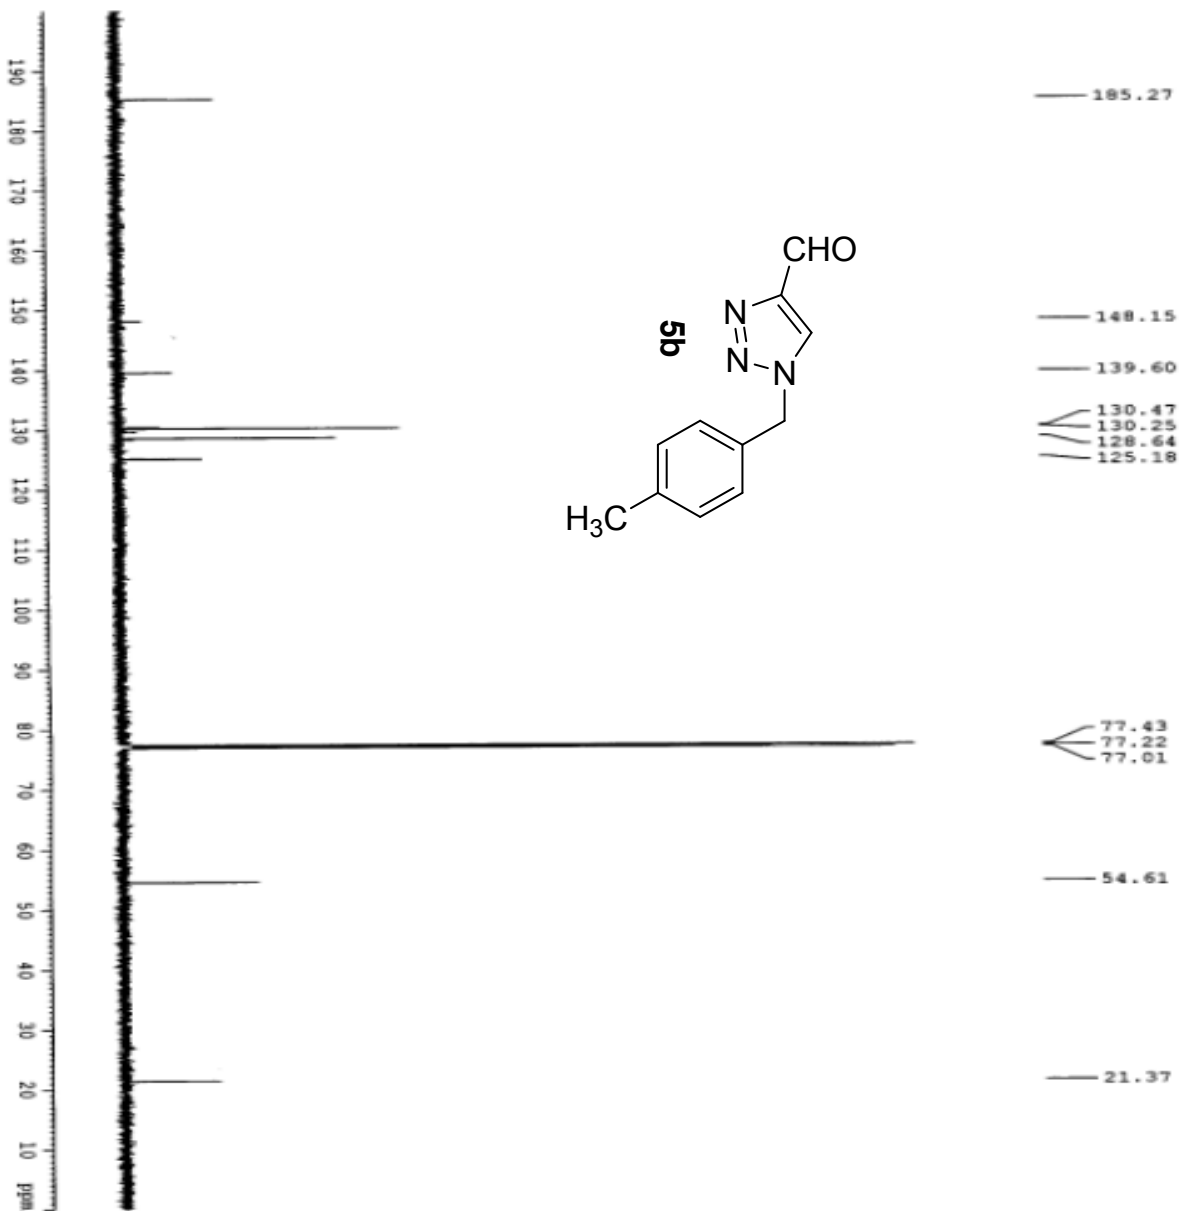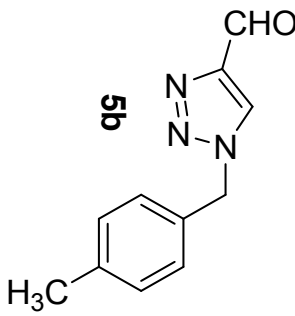

Current Data Parameters  
 NAME: Ald-98-2-13C  
 EXPTNO: 1  
 PROCNO: 1

F2 - Acquisition Parameters  
 Date\_: 20131216  
 Time: 14.02

INSTRUM: spect  
 PROBRD: 5 mm BBA60 BB/  
 PULPROG: zgpg30  
 TD: 32768  
 SOLVENT: CDCl3  
 NS: 70  
 DS: 2

SWH: 36057.691 Hz  
 FIDRES: 1.100393 Hz  
 AQ: 0.4543829 sec  
 RG: 65.24  
 BW: 13.867 usec  
 DE: 6.50 usec  
 TE: 296.8 K  
 D1: 2.00000000 sec  
 D11: 0.03000000 sec  
 TPRO: 1

----- CHANNEL f1 -----  
 SFO1: 150.9279571 MHz  
 NUC1: 13C  
 P1: 10.50 usec  
 PLW1: 95.00000000 W

----- CHANNEL f2 -----  
 SFO2: 650.1724007 MHz  
 NUC2: 1H  
 CPROG12: waltz16  
 RPRG12: TO.00 usec  
 P1M12: 21.00000000 W  
 P1M13: 0.61714000 W  
 P2M13: 0.30239999 W

F2 - Processing parameters  
 SI: 16384  
 SF: 150.9128398 MHz  
 KW: EN  
 SSF0: 0  
 LA: 1.00 Hz  
 GB: 0  
 PC: 1.40

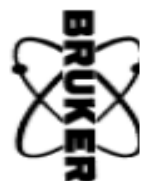

HRMS spectra of 5b

Sample Name  
Inj Vol  
Data Filename

Position  
InjPosition  
Acq Method

Instrument Name  
Sample Type  
Comment

User Name  
IRM Calibration Status  
Acquired Time

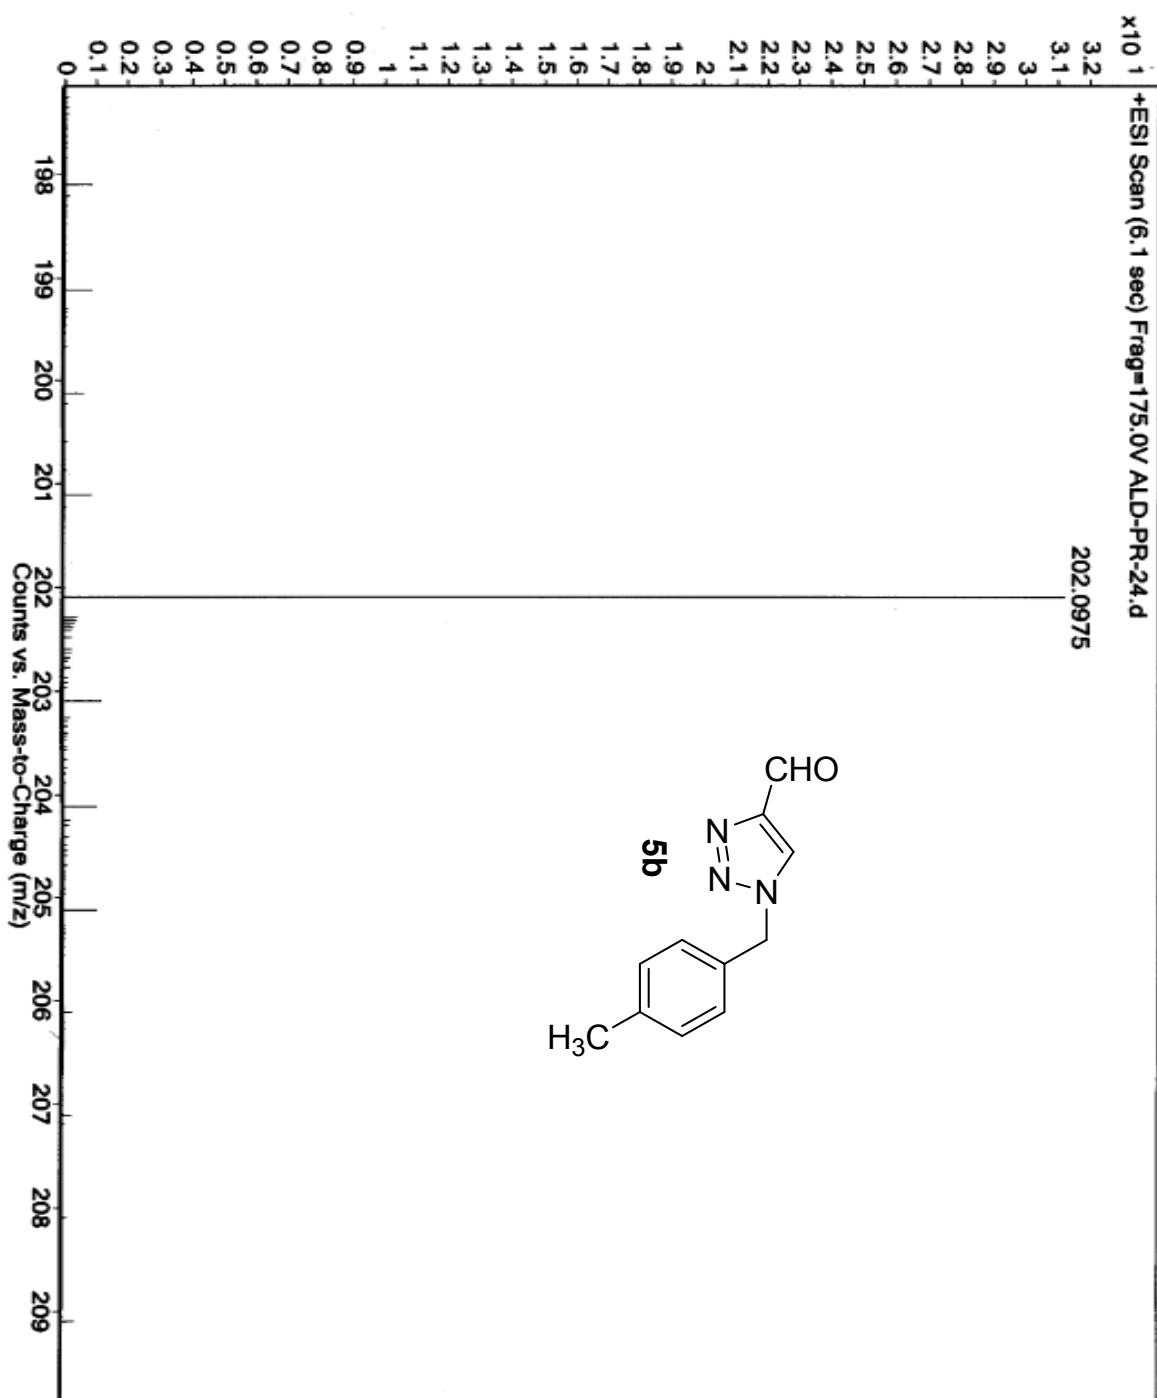

<sup>1</sup>H NMR spectra of 5c

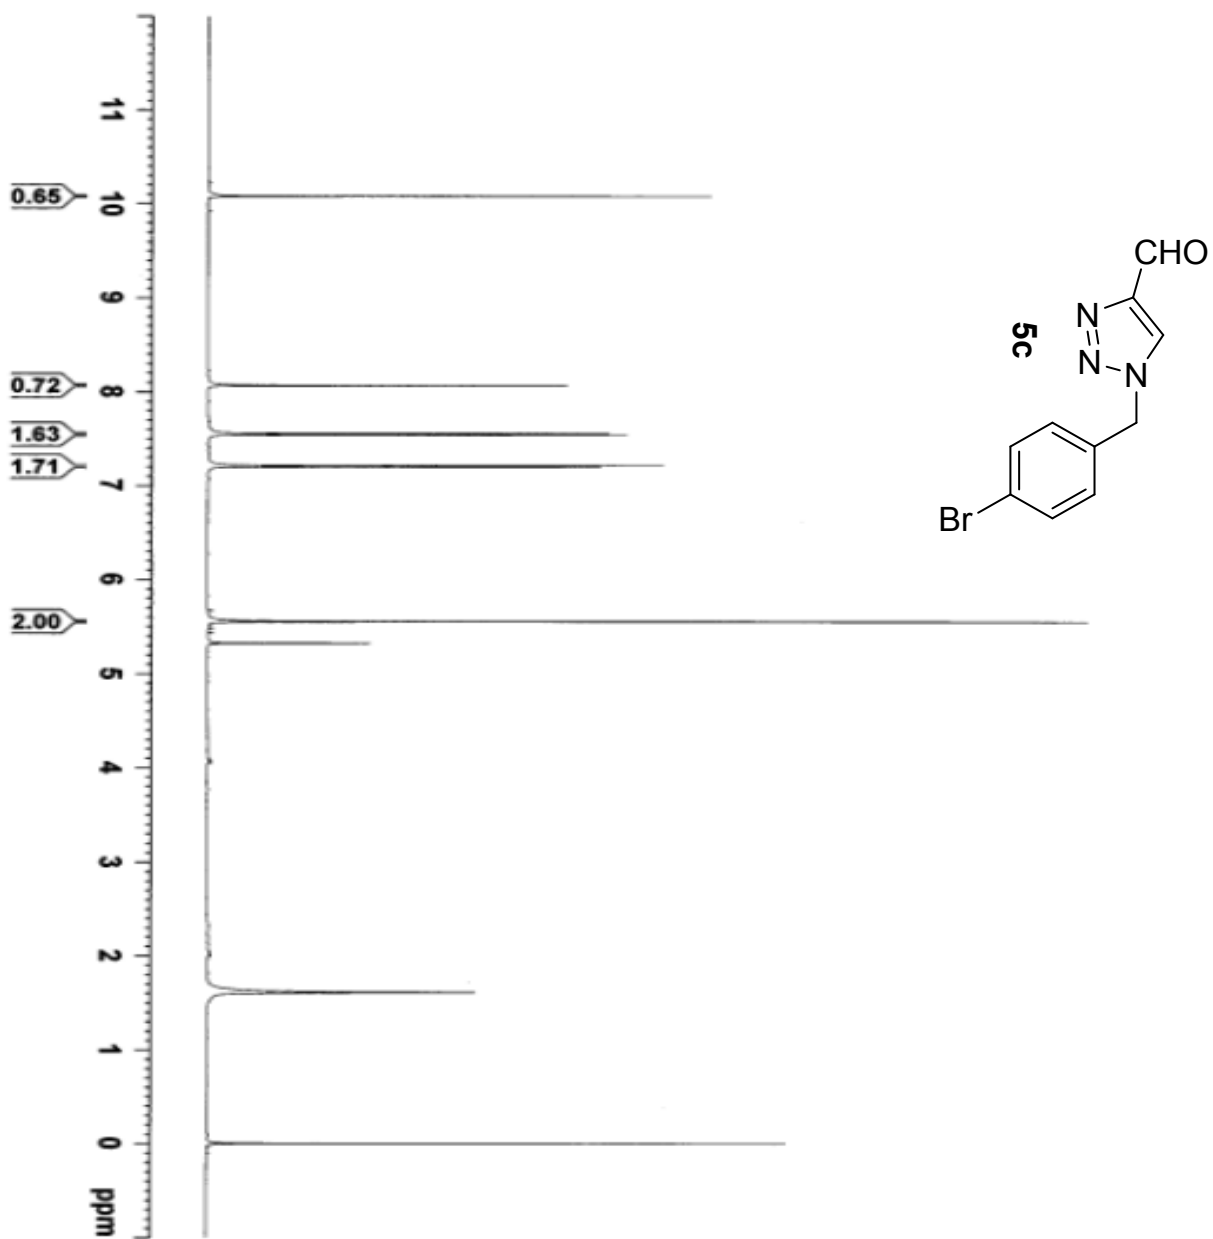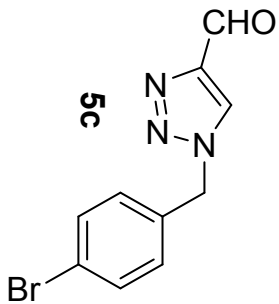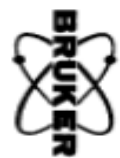

Current Data Parameters  
 NAME: A20-70-1\_1F  
 EXNO: 1  
 F2ACQ: 1

F2 - Acquisition Parameters  
 Date\_: 20111213  
 Time: 15.24

INSTRUM: spect  
 PROCNO: 5 nm F800 BB/  
 PULPROG: zg30  
 TD: 32768  
 SOLVENT: CDCl3  
 NS: 16  
 DS: 2  
 SFO: 1201.9, 230 Hz  
 F1FREQ: 0.364798 Hz  
 AQ: 1.7637480 sec  
 NU: 819.67  
 DV: 41.600 uVAC  
 DE: 6.50 uVAC  
 TE: 297.2 K  
 D1: 1.00000000 sec  
 TDO: 1

===== CHANNEL f1 =====  
 NUC1: 600.137063 MHz  
 P1: 12.00 uVAC  
 FREQ1: 21.00000000 MHz

F2 - Processing parameters  
 SI: 16384  
 SF: 600.137063 MHz  
 WDM: 0  
 SSB: 0  
 LB: 0.30 Hz  
 GB: 0  
 PC: 1.00

<sup>13</sup>C NMR spectra of 5c

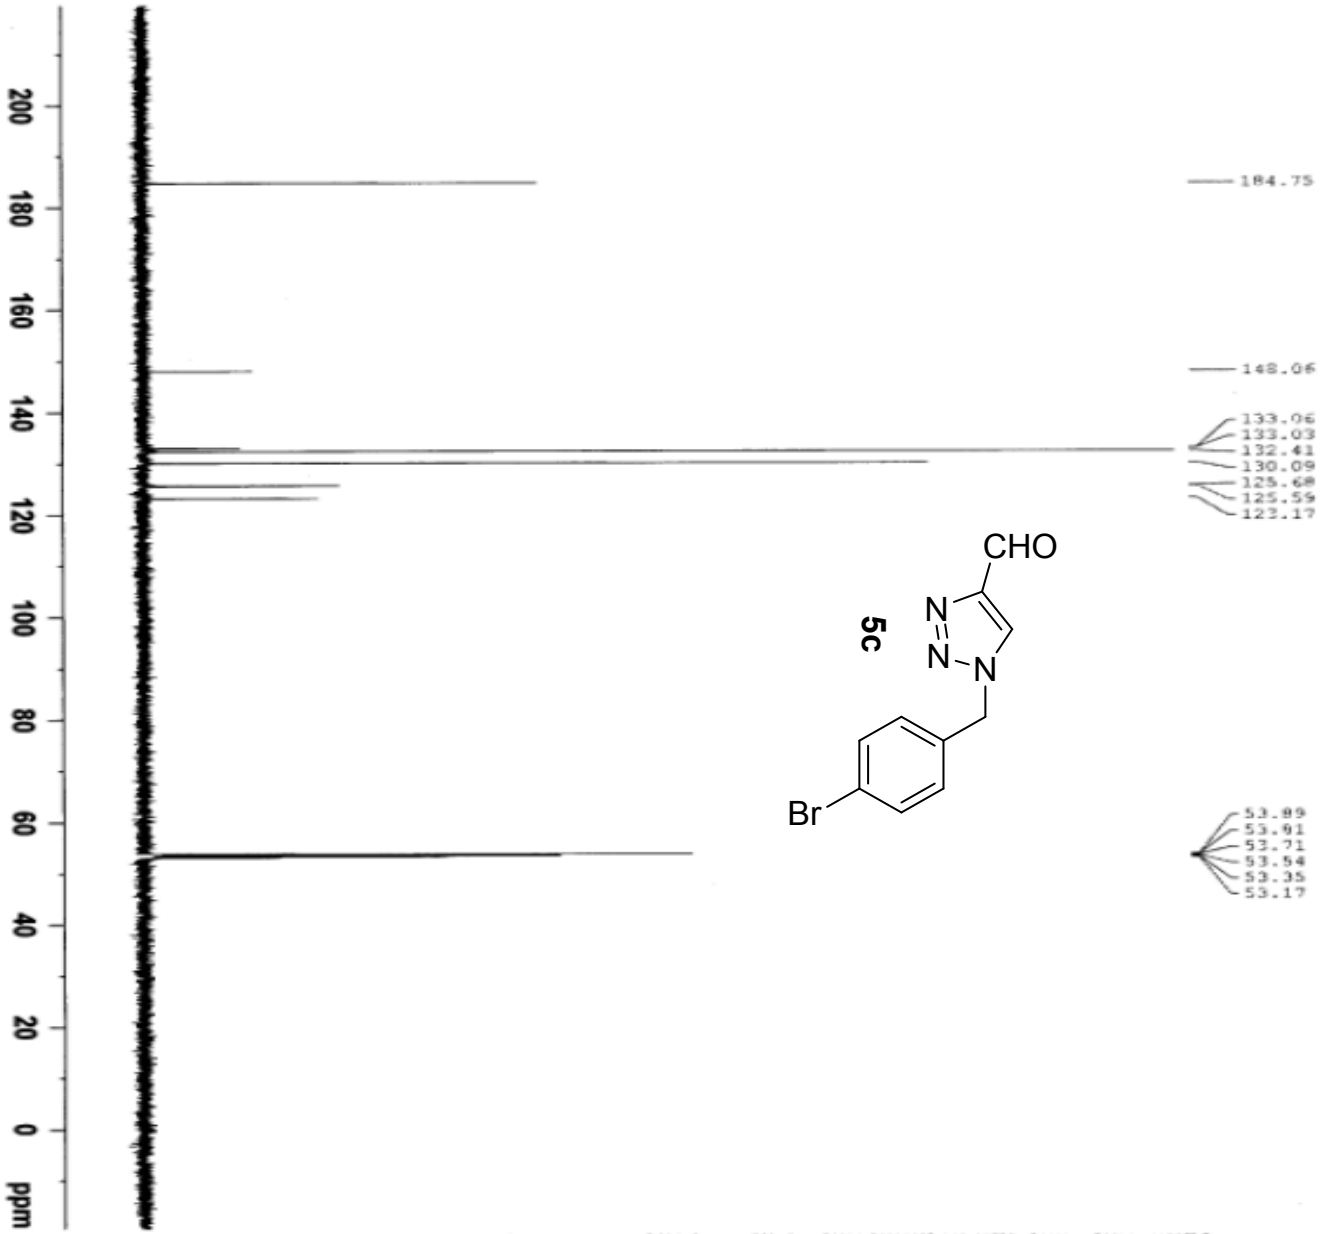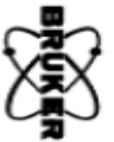

Current Data Parameters  
 NAME AD-91-1\_13C  
 EXPNO 1  
 PROCNO 1  
 F2 - Acquisition Parameters  
 Date\_ 20131213  
 Time 15.49  
 INSTRUM spect  
 PULPROG zgpg30  
 TO 37748  
 SOLVENT CDCl3  
 NS 79  
 DS 2  
 SWH 36037.491 Hz  
 F1F0RES 1.108193 Hz  
 AQ 0.4549829 sec  
 RG 40.24  
 WM 13.667 sec  
 ZG 5.50 sec  
 TE 297.2 K  
 FL 2.0000000 sec  
 TI1 0.0300000 sec  
 T20 1

===== CHANNEL f1 =====  
 DTOR 156.5217911 MHz  
 NUC1 13C  
 P1 18.50 sec  
 PL1 95.0000000 dB  
 ===== CHANNEL f2 =====  
 DTOR 400.1764007 MHz  
 NUC2 1H  
 P2 0.0000000 sec  
 PL2 0.0000000 dB  
 =====  
 F2 - Processing parameters  
 SI 16384  
 SF 350.9126887 MHz  
 KW 0 DM  
 SFO 0  
 LB 1.00 Hz  
 GB 0  
 PC 1.40



HRMS spectra of 5c

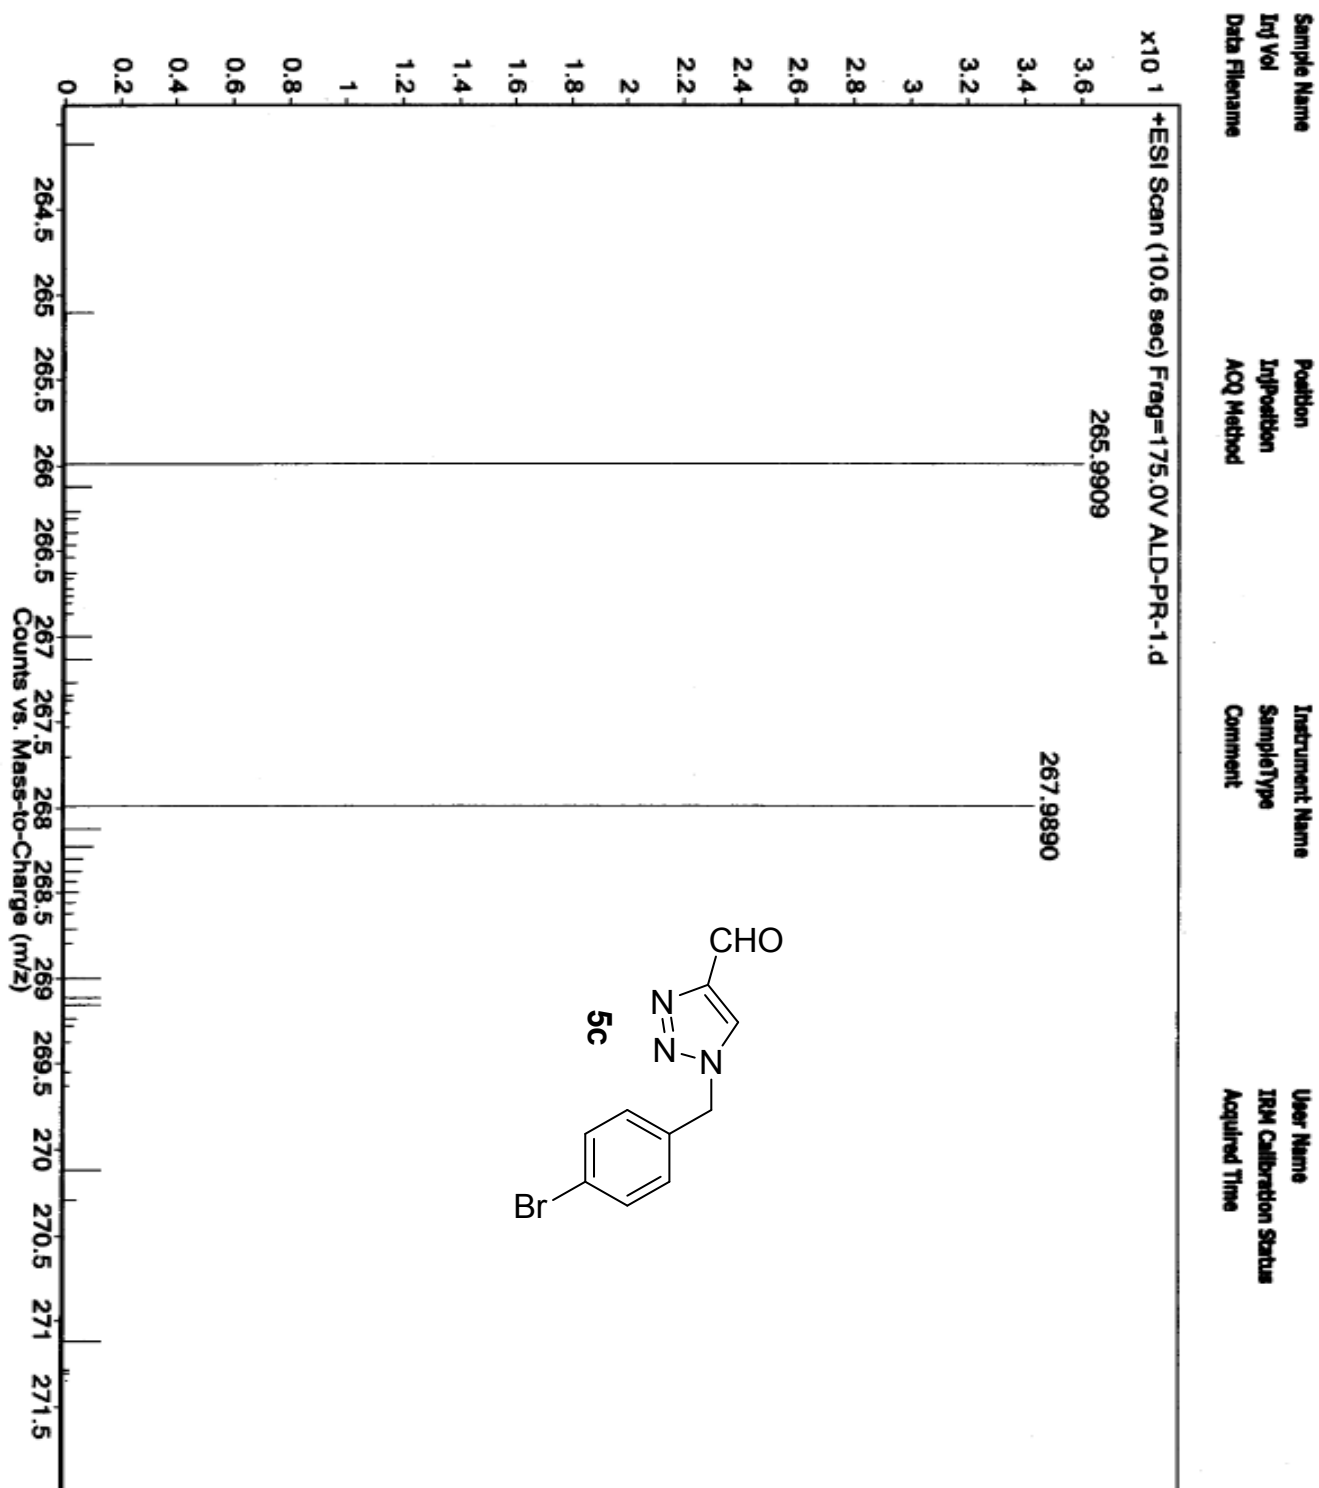

<sup>1</sup>H NMR spectra of 5d

Sample Name:  
ALD-4F-PR  
Data Collected on:  
ITG-NMR-mercury400  
Archive directory:

Sample directory:

Filefile: PROTON

Pulse Sequence: PROTON (zgpg3)  
Solvent: cdcl3  
Data collected on: Mar 11 2014

Temp: 25.0 C / 298.1 K  
Operator: chem

Relax. delay 1.000 sec  
Pulse 45.0 degrees  
Acq. time 2.561 sec  
Width 6398.0 Hz  
32 repetitions  
OBSERVE H1, 399.8509739 MHz  
DATA PROCESSING  
FT size 32768  
Total time 2 min 12 sec

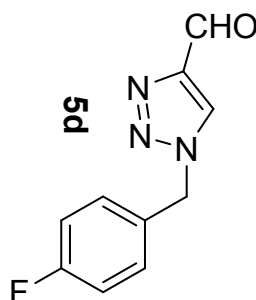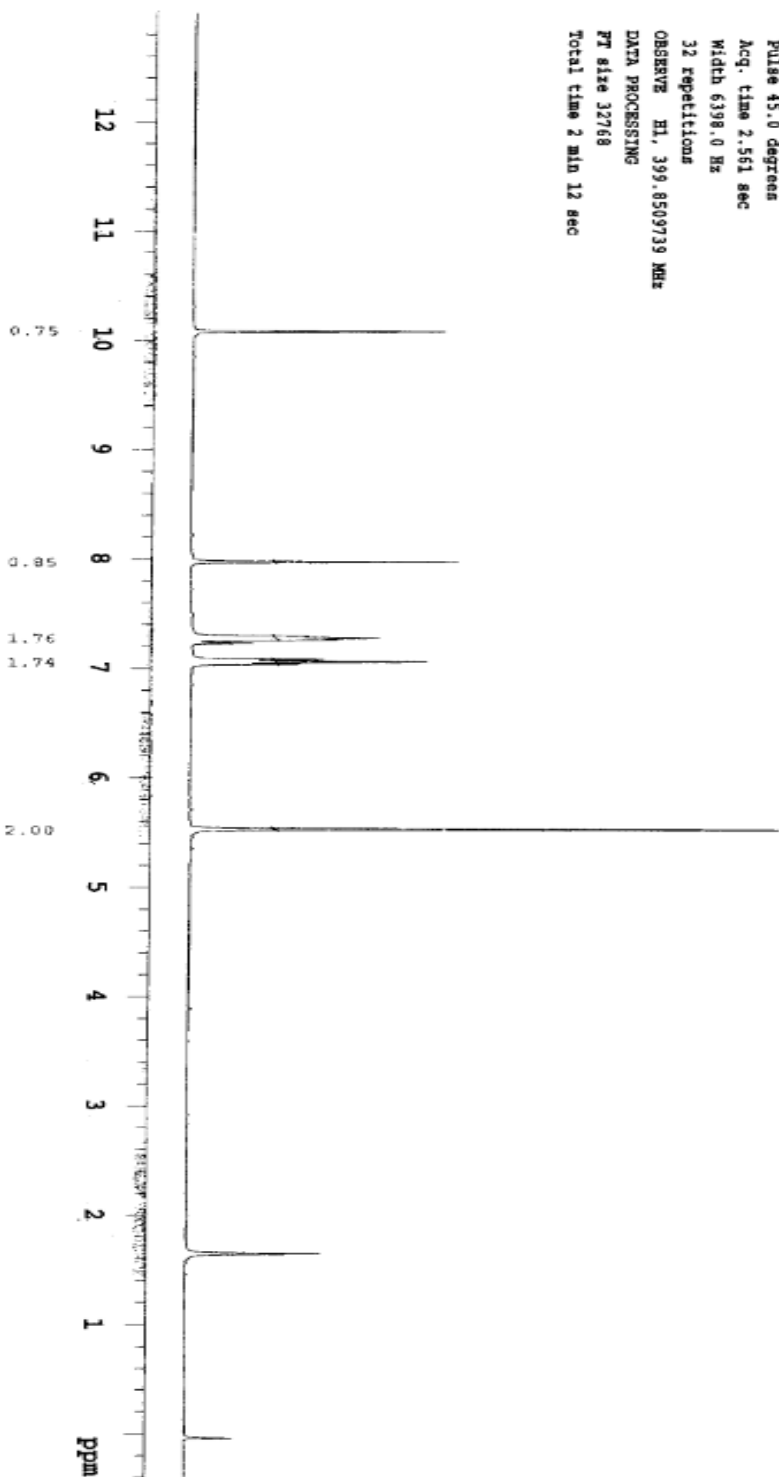

<sup>13</sup>C NMR spectra of 5d

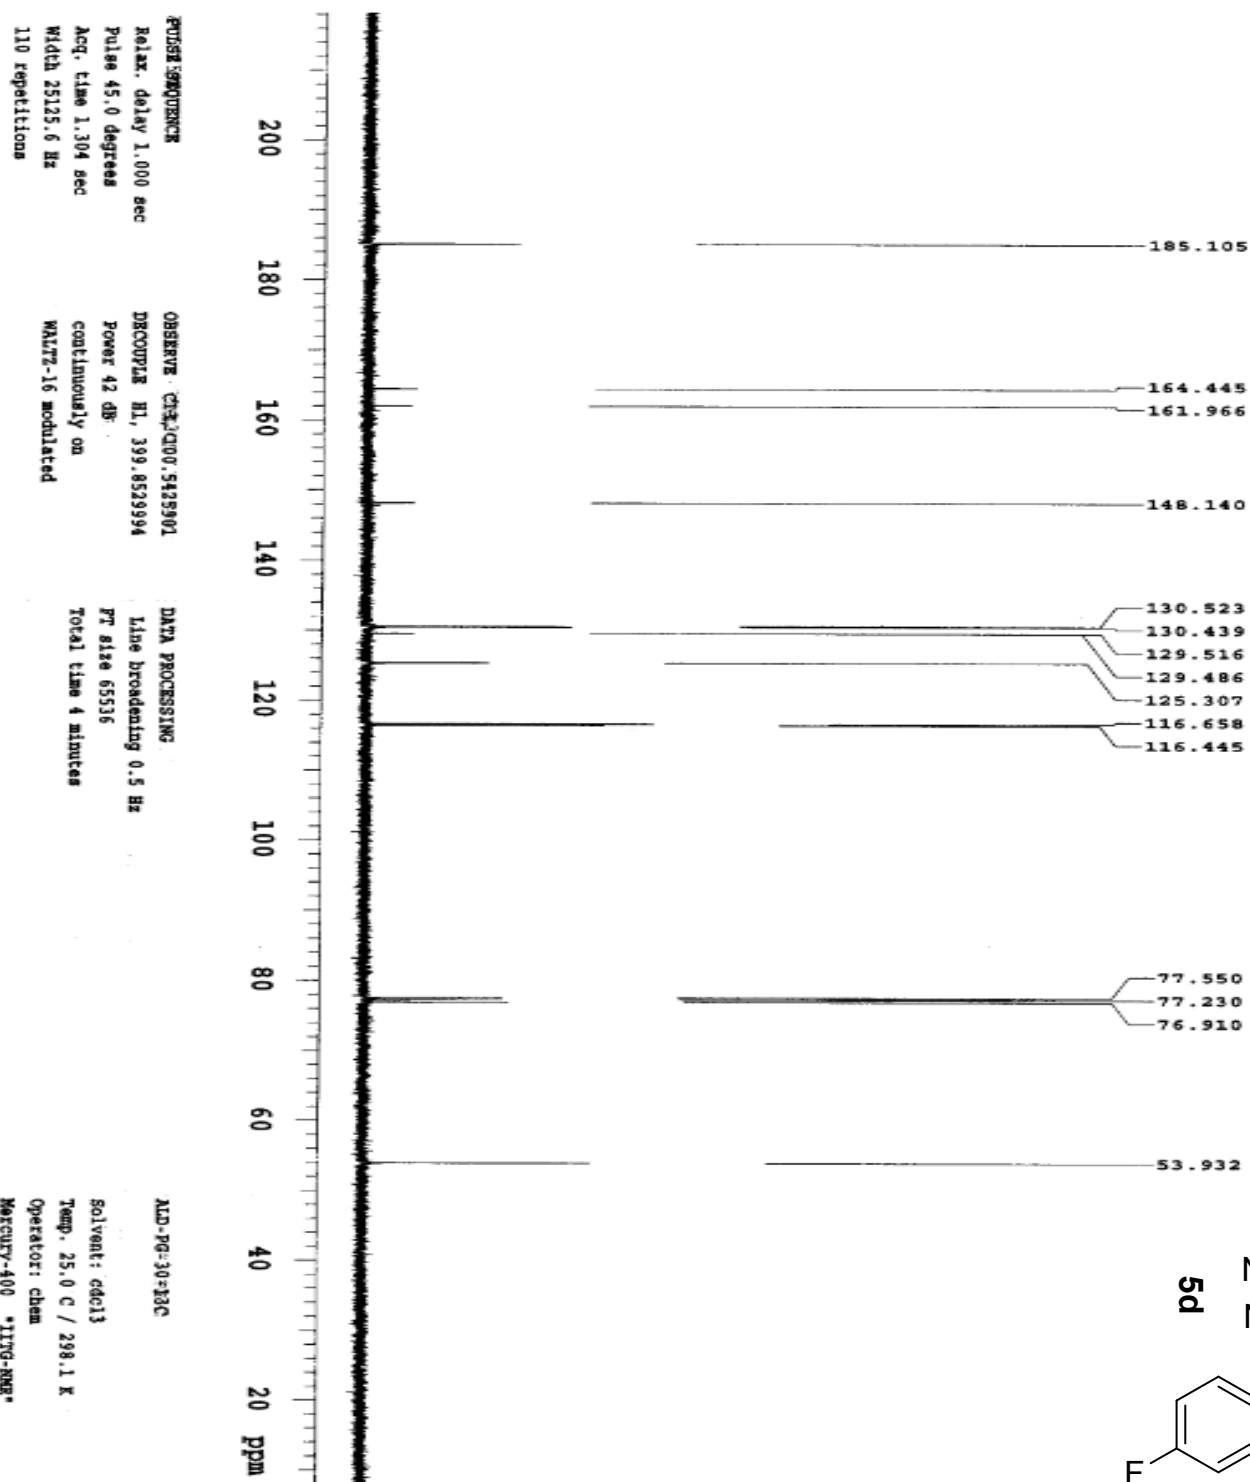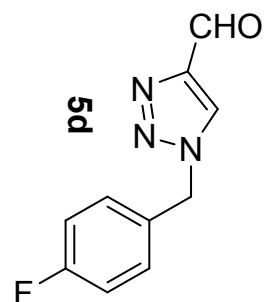

HRMS spectra of 5d

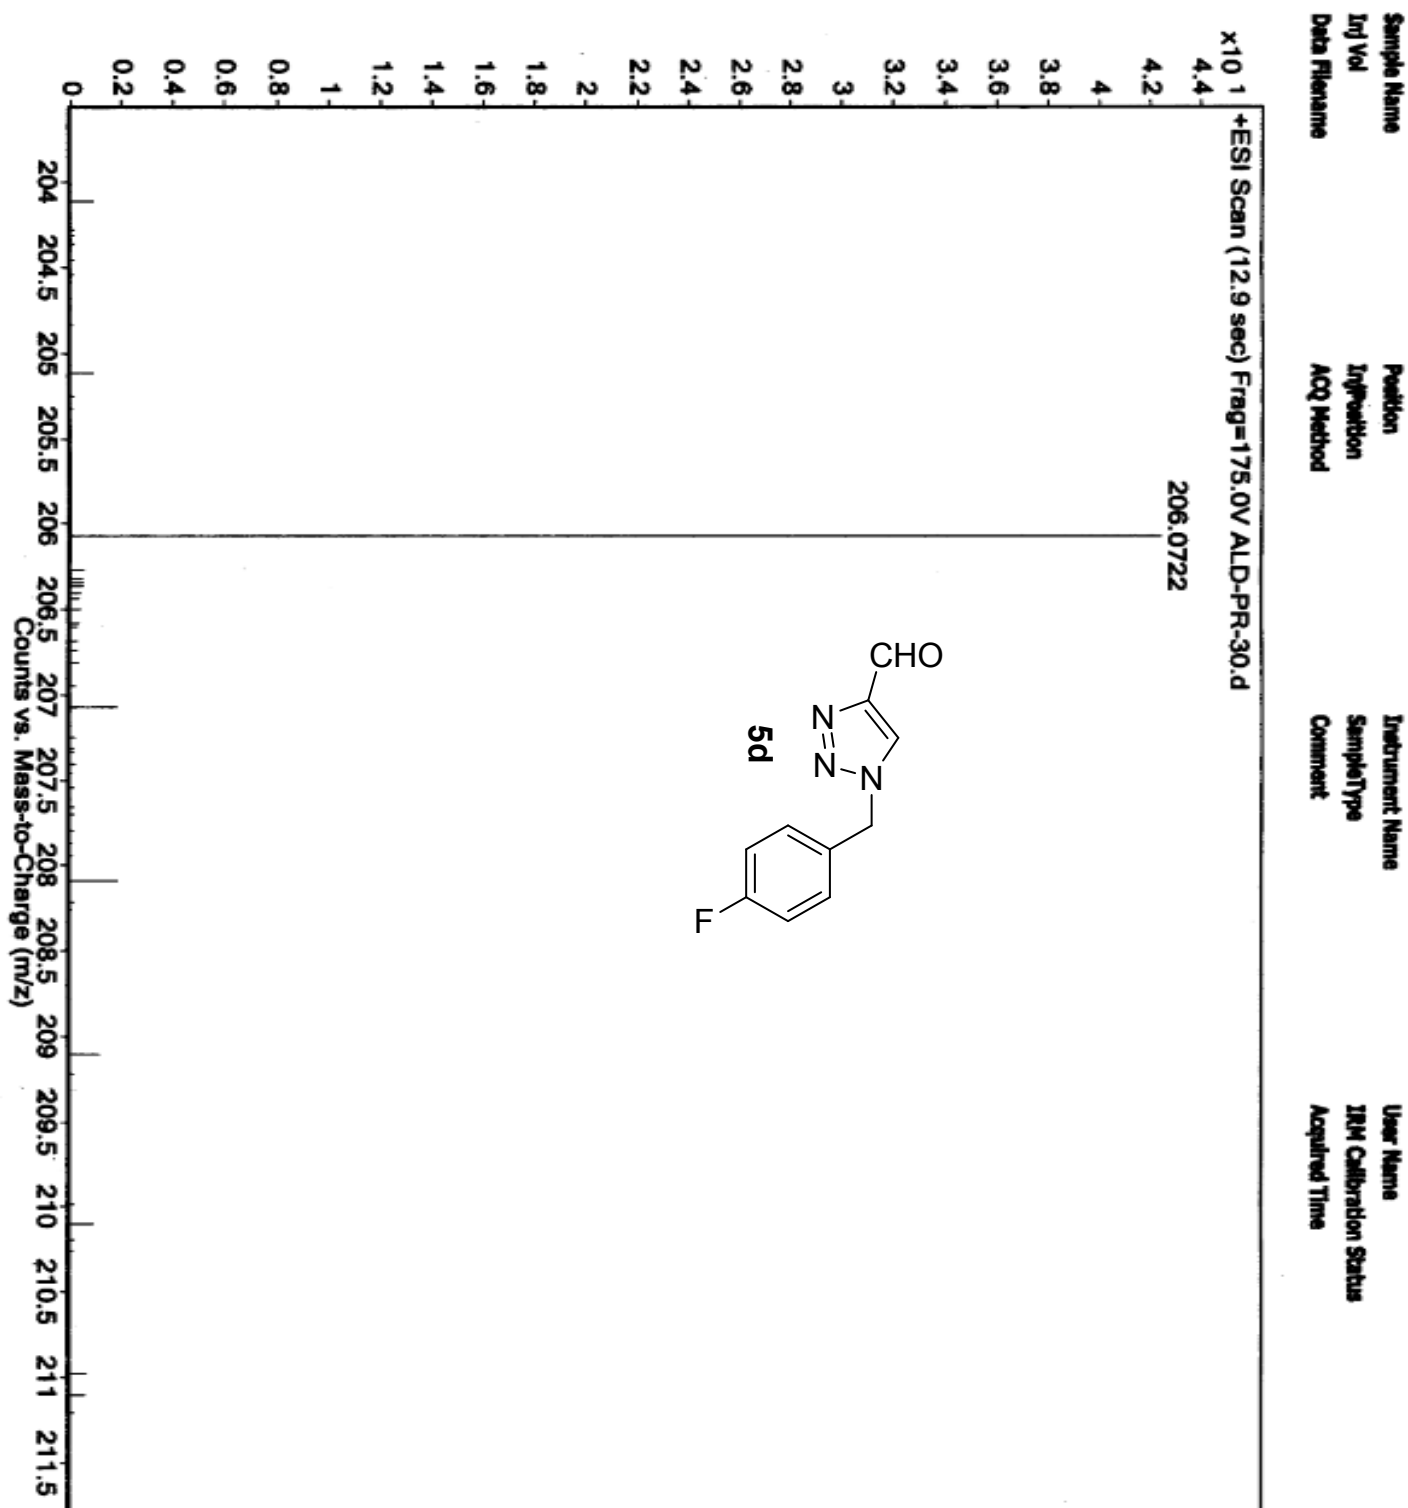

<sup>1</sup>H NMR spectra of 5e

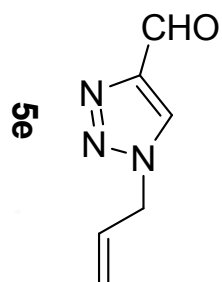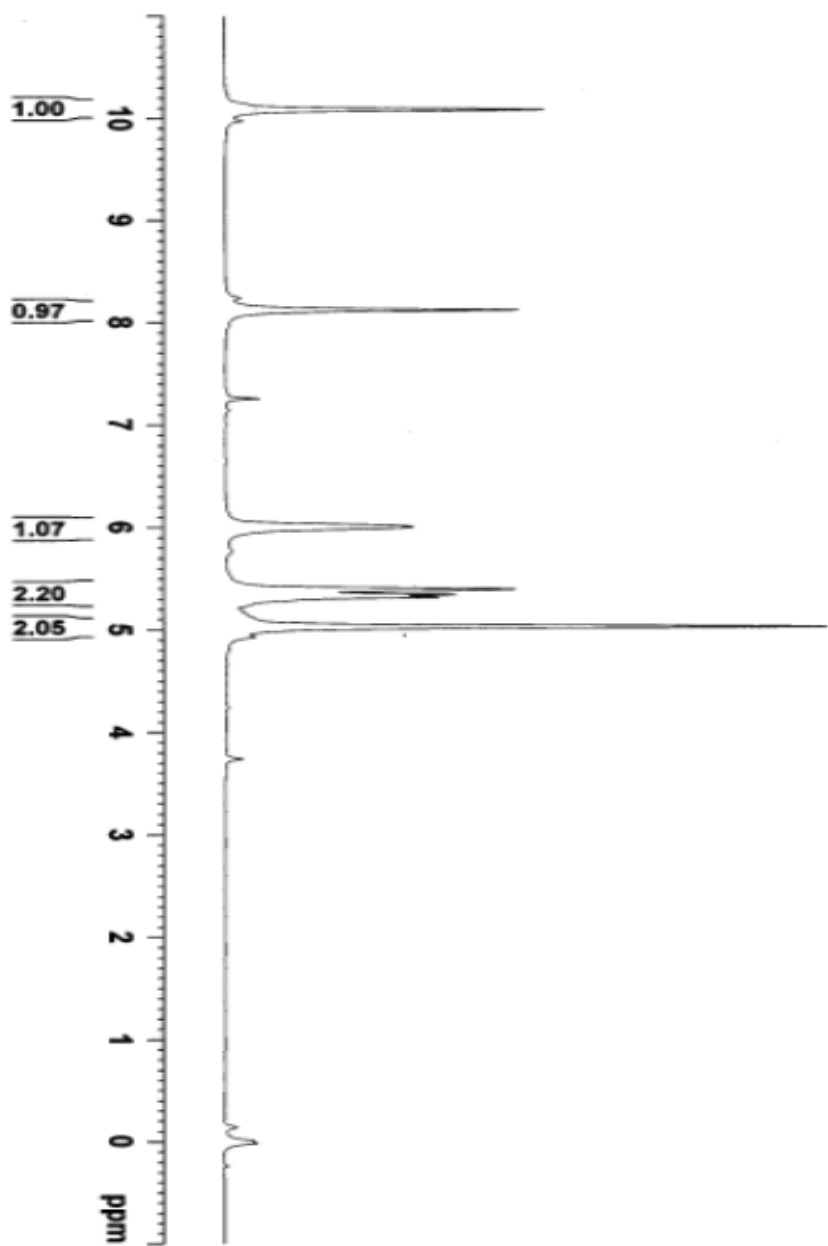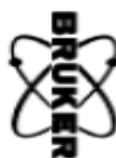

Current Data Parameters  
 NAME ALD-PR-12-11  
 EXPNO 1  
 PROCNO 1

F2 - Acquisition Parameters  
 Date\_ 20131219  
 Time 12.24

INSTRUM spect  
 PULPROG zgpg30  
 F2FREQ 2930  
 F1 32168  
 SOLVENT CDCl3  
 NS 16  
 DS 2

SI 12019.230 Hz  
 SF 0.366788 Hz  
 AQ 1.1631488 sec  
 RG 39.59

SW 41.000 usec  
 SR 6.50 usec  
 TR 296.6 K  
 D1 1.00000000 sec  
 T10 1

\*\*\*\*\* CHANNEL f1 \*\*\*\*\*  
 SFO1 600.137063 MHz  
 NUC1 13  
 P1 12.00 usec  
 PL1 21.00000000 W

F2 - Processing parameters  
 SI 16384  
 SF 600.137063 MHz  
 WDW EM  
 SSB 0  
 LB 0.30 Hz  
 GB 0  
 PC 1.00

<sup>13</sup>C NMR spectra of 5e

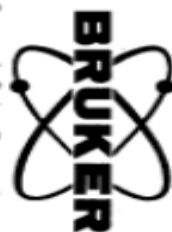

Current Data Parameters  
 NAME ALD-PR-12-13C  
 EXPRNO 1  
 PROCNO 1

F2 - Acquisition Parameters

Date\_ 20131219  
 Time 12.17  
 INSTRUM spect  
 PROBD 5 mm PABBO BB/  
 PULPROG zgpg30  
 TD 32768  
 SOLVENT CDCl3  
 NS 56  
 DS 2  
 SWH 36057.691 Hz  
 FIDRES 1.100393 Hz  
 AQ 0.4543829 sec  
 RG 65.24  
 DW 13.867 usec  
 DE 6.50 usec  
 TE 296.7 K  
 D1 2.00000000 sec  
 D11 0.03000000 sec  
 TDO 1

CHANNEL F1

SFO1 150.9279571 MHz  
 NUC1 13C  
 P1 10.50 usec  
 PLW1 95.00000000 W

CHANNEL F2

SFO2 600.1724007 MHz  
 NUC2 1H  
 CPOPRG(2) waltz16  
 PCPD2 70.00 usec  
 PLW2 21.00000000 W  
 PLW12 0.61714000 W  
 PLW13 0.30239999 W

F2 - Processing parameters

SI 16384  
 SF 150.9128657 MHz  
 WDW EM  
 SSB 0  
 LB 1.00 Hz  
 GB 0  
 PC 1.40

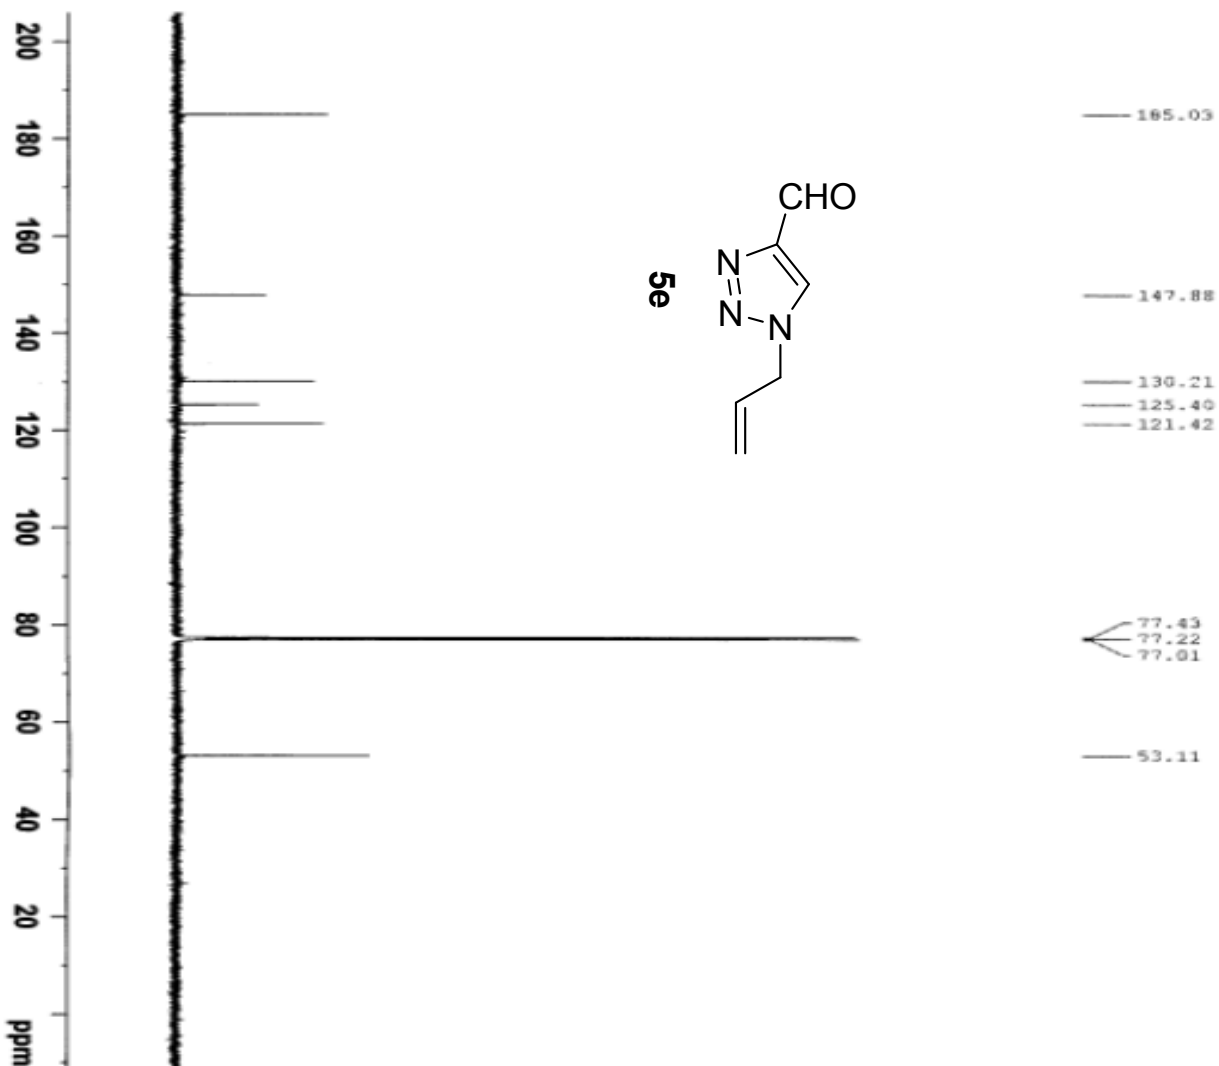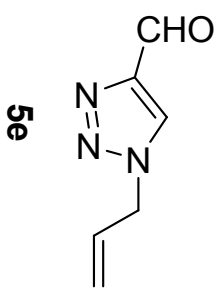

MS spectra of 5e

Sample Name  
Inj Vol  
Data Filename

Position  
InjPosition  
Acq Method

Instrument Name  
SampleType  
Comment

User Name  
IRM Calibration Status  
Acquired Time

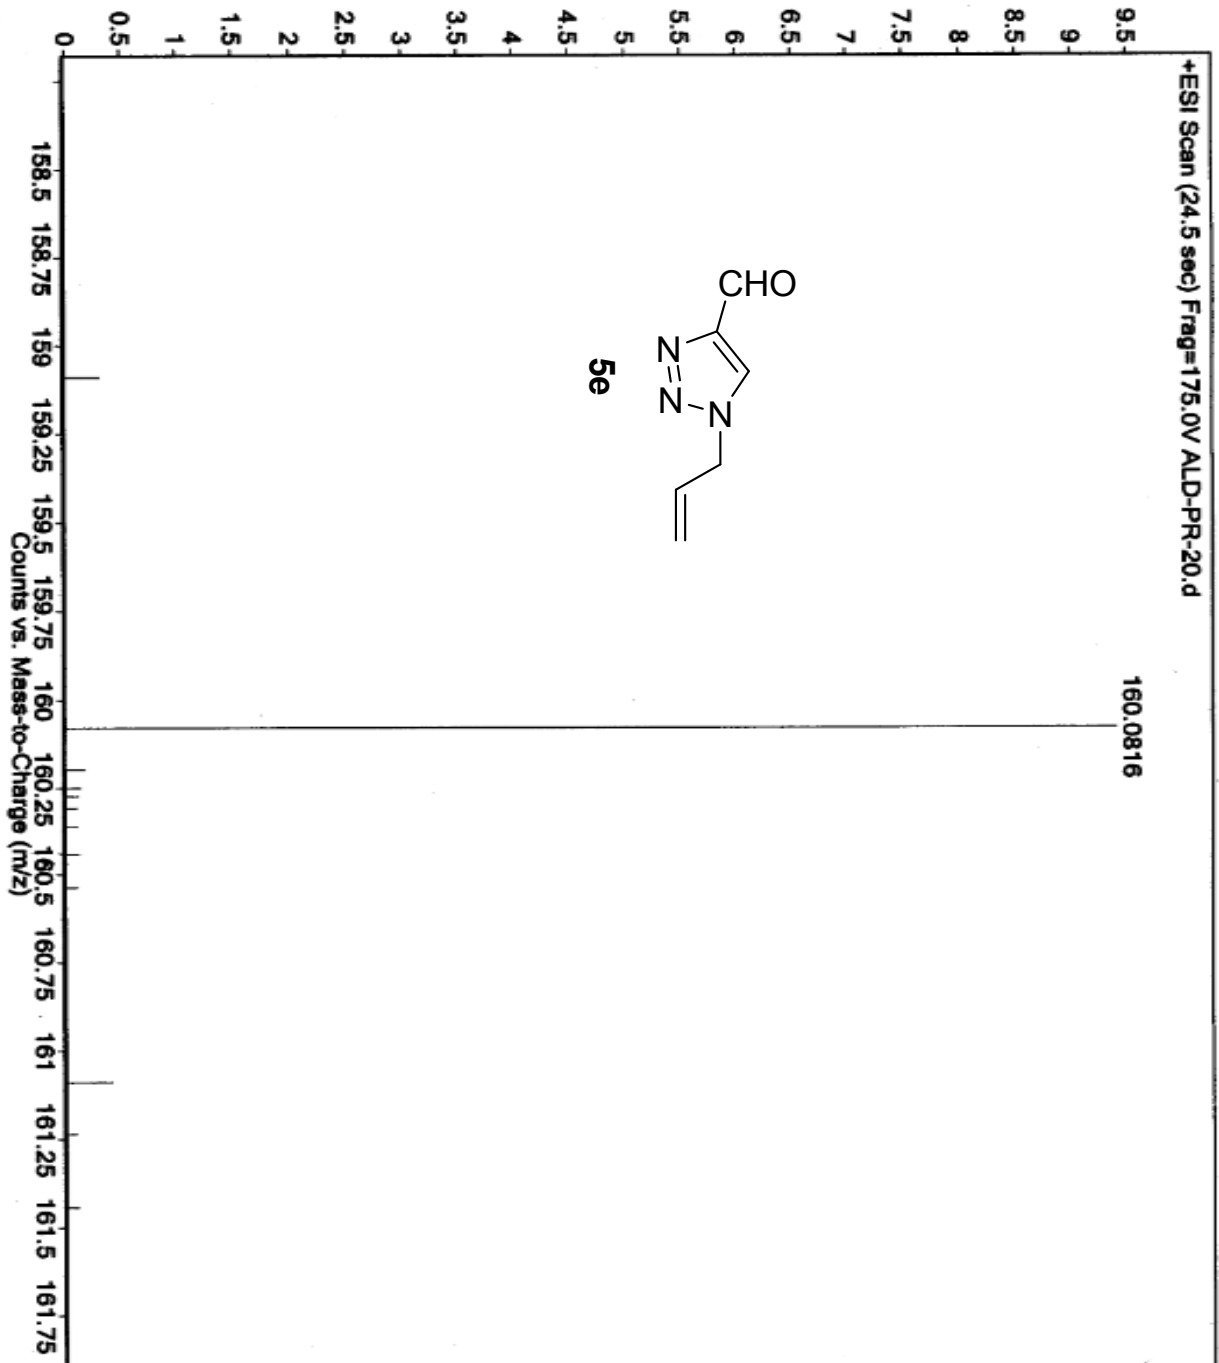

ALD\_PR-Rt-CHO

Sample Name:

ALD\_PR-Rt-CHO

Data Collected on:

IITG-NMR-mercury400

Archive directory:

/export/home/chempack/vnmrpy/data

Sample directory:

FIDFile: PROTON

Pulse Sequence: PROTON (zgpg3)

Solvent: cdcl3

Data collected on: Mar 21 2014

Temp: 25.0 C / 298.1 K

Operator: chem

Relax. delay 1.000 sec

Pulse 45.0 degrees

Acq. time 2.561 sec

Width 6398.0 Hz

32 repetitions

OBSERVE H1, 399.851441 MHz

DATA PROCESSING

FT else 32768

Total time 2 min 12 sec

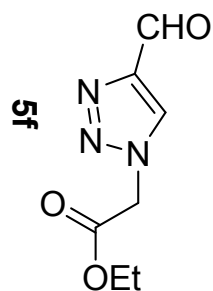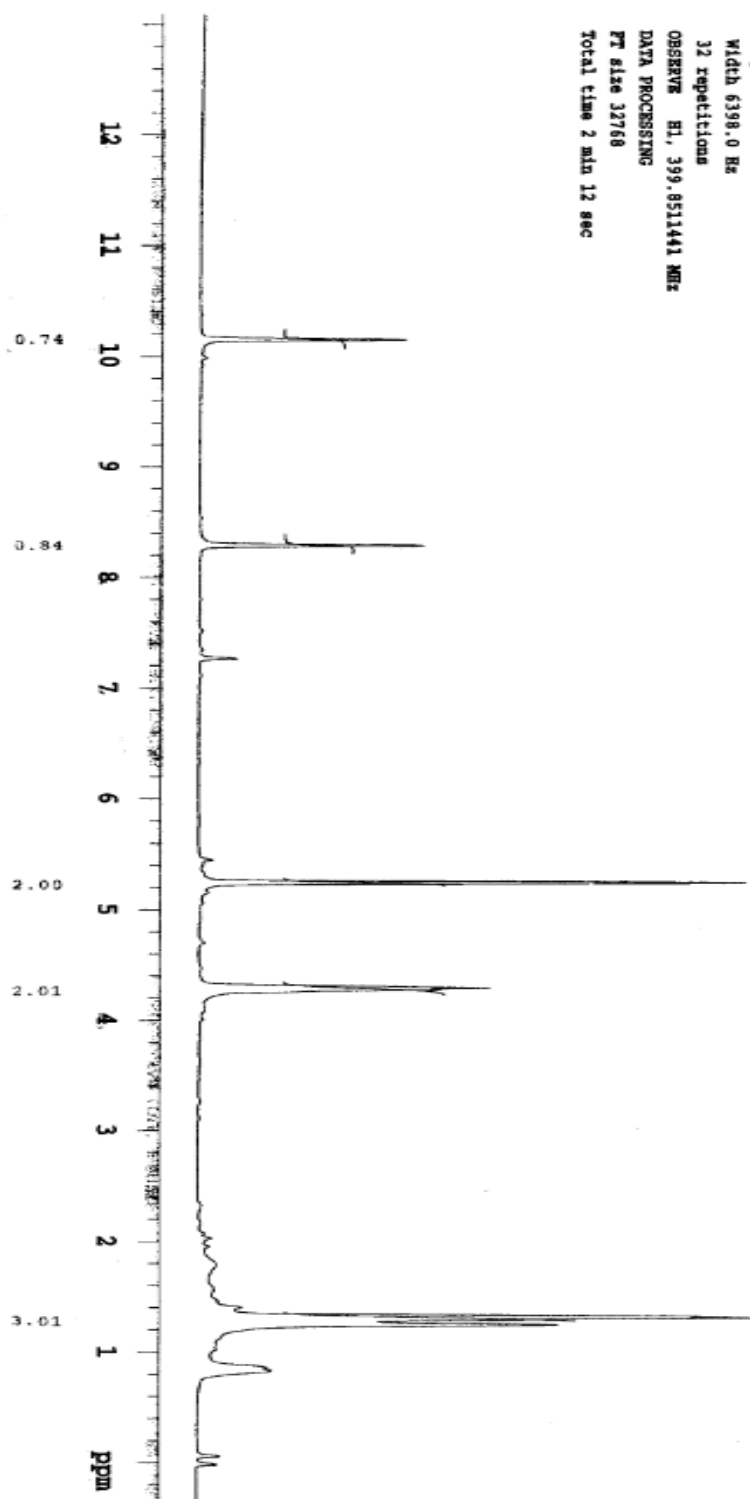



<sup>13</sup>C NMR spectra of 5f

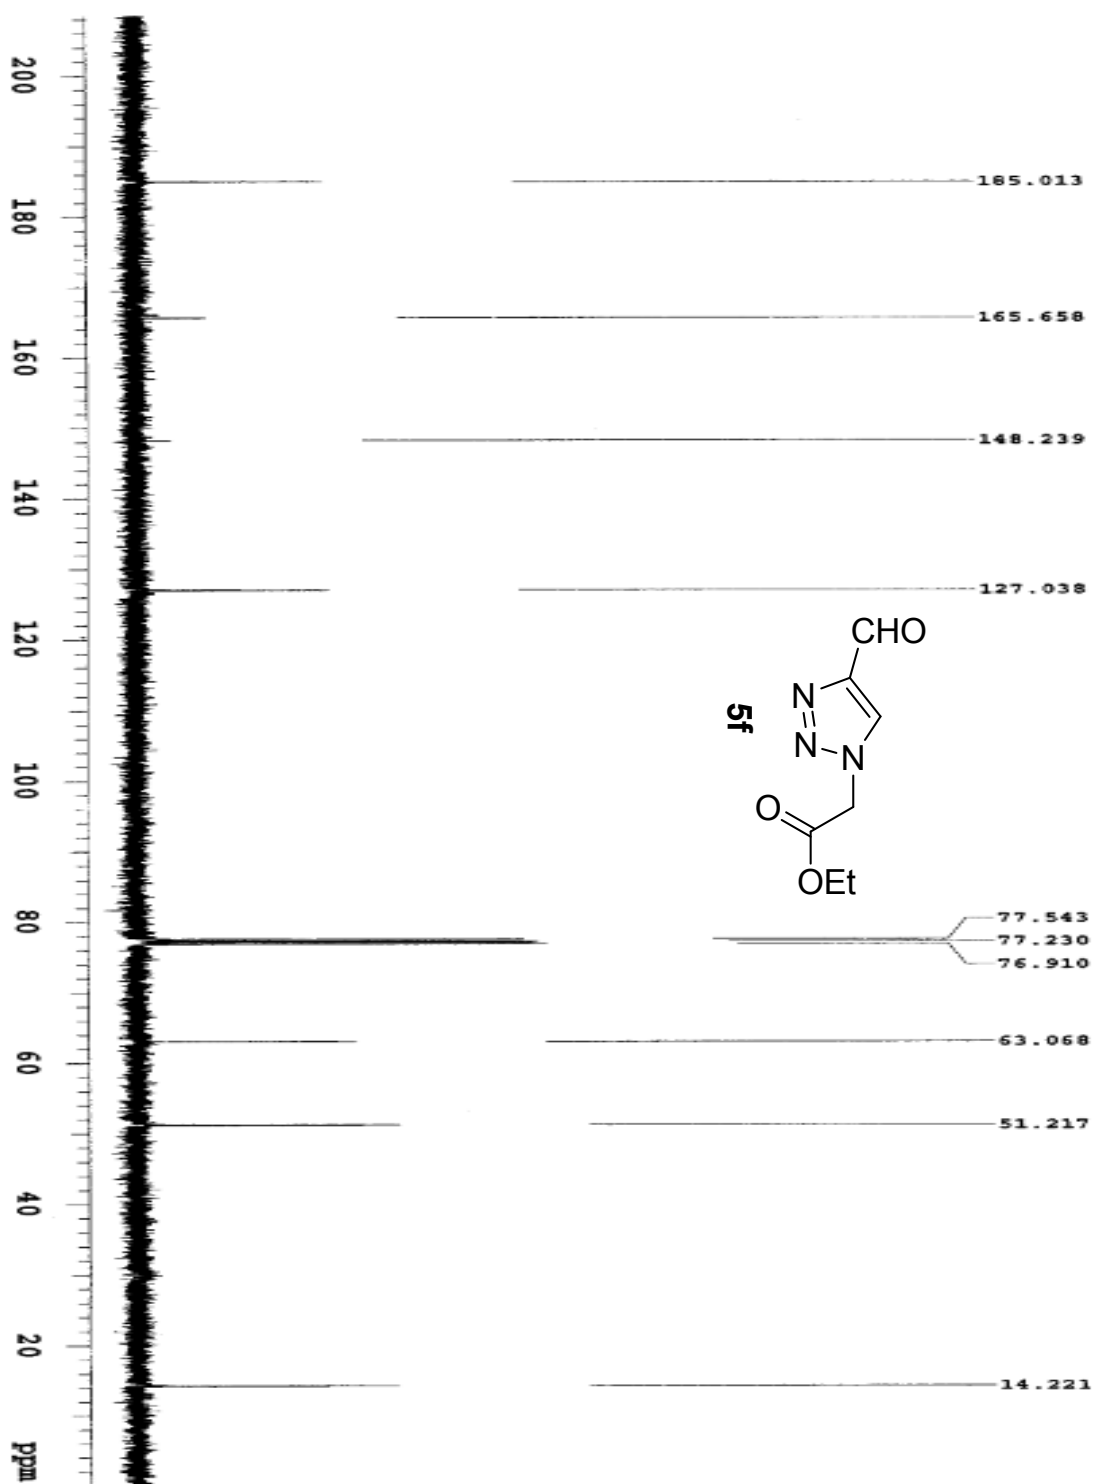

PROB:SEQUENCE:  
Relax. delay 1.000 sec  
Pulse 45.0 degrees  
Acq. time 1.304 sec  
Width 25125.6 Hz  
550 repetitions

OBSERVE:CL3, 100, 5426269  
DECUPLE HL, 39, 852994  
Power 42 dB  
continuously on  
WALTZ-16 modulated

DATA PROCESSING:  
Line broadening 0.5 Hz  
FT size 65536  
Total time 21 minutes

ALD-PR-BE-CHO-13C  
Solvent: cdcl3  
Temp: 25.0 C / 298.1 K  
Operator: chem  
Mercury-400 \*11TG-NMR\*

HRMS spectra of **5f**

Sample Name  
Inj Vol  
Data Filename

Position  
InjPosition  
ACQ Method

Instrument Name  
SampleType  
Comment

User Name  
IRM Calibration Status  
Acquired Time

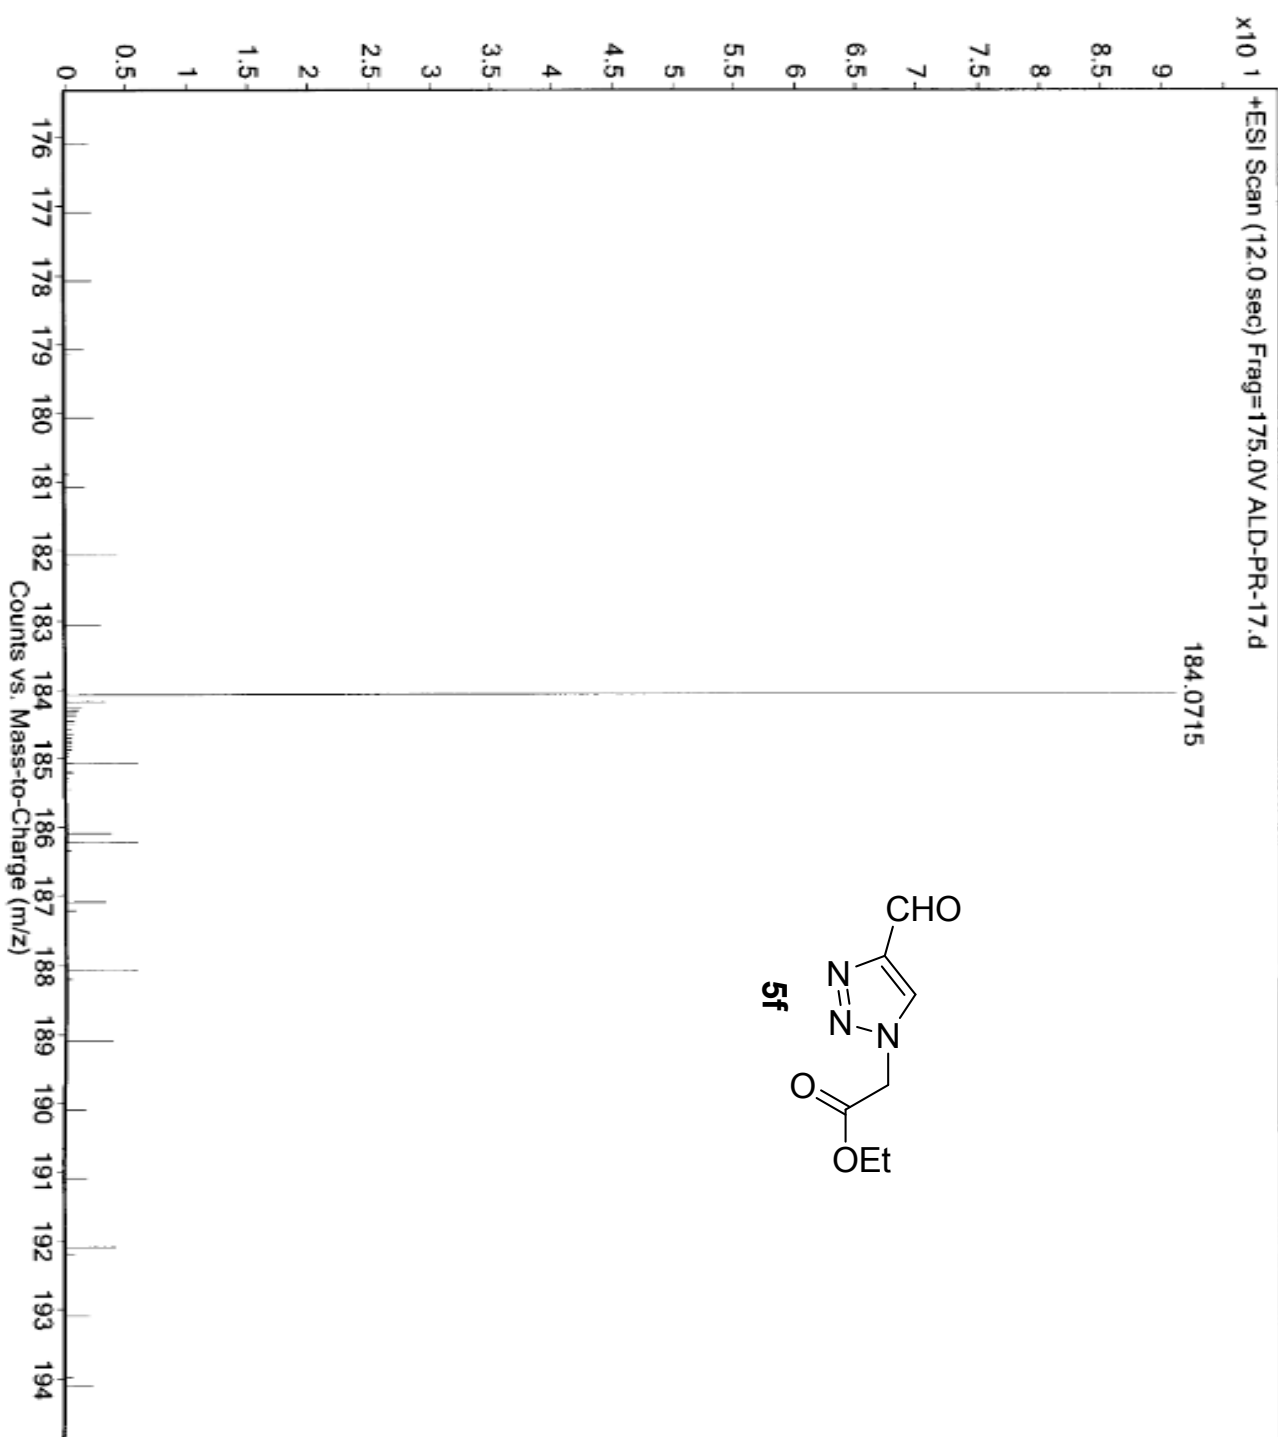

<sup>1</sup>H NMR spectra of 8a

Sample Name:  
ALD\_PPG\_PP\_2  
Data Collected on:  
IT70-NMR-mercury400  
Archive directory:

Sample directory:

FIDFile: PROTON

Pulse Sequence: PROTON (zgpg3)  
Solvent: cdcl3  
Data collected on: Mar 20 2014

Temp: 25.0 C / 298.1 K  
Operator: cham

Relax. delay 1.000 sec  
Pulse 45.0 degrees  
Acq. time 2.561 sec  
Width 6398.0 Hz  
32 repetitions  
OBSERVE HI, 399.850383 MHz  
DATA PROCESSING  
PT size 32768  
Total time 2 min 12 sec

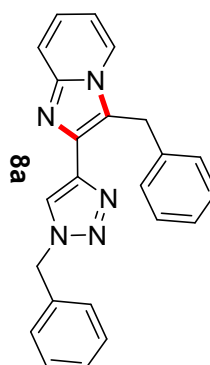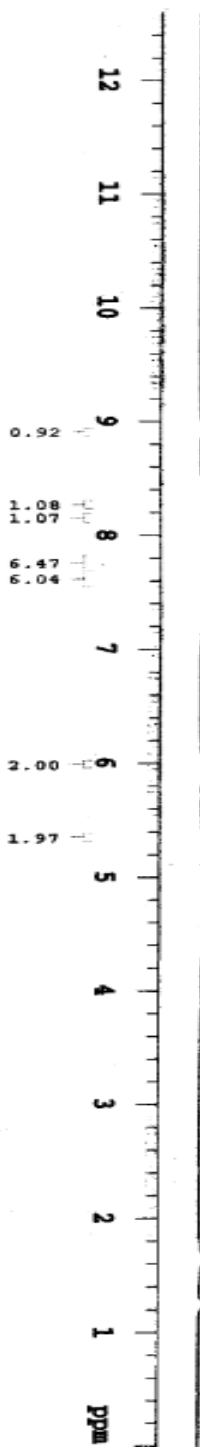

<sup>13</sup>C NMR spectra of **8a**

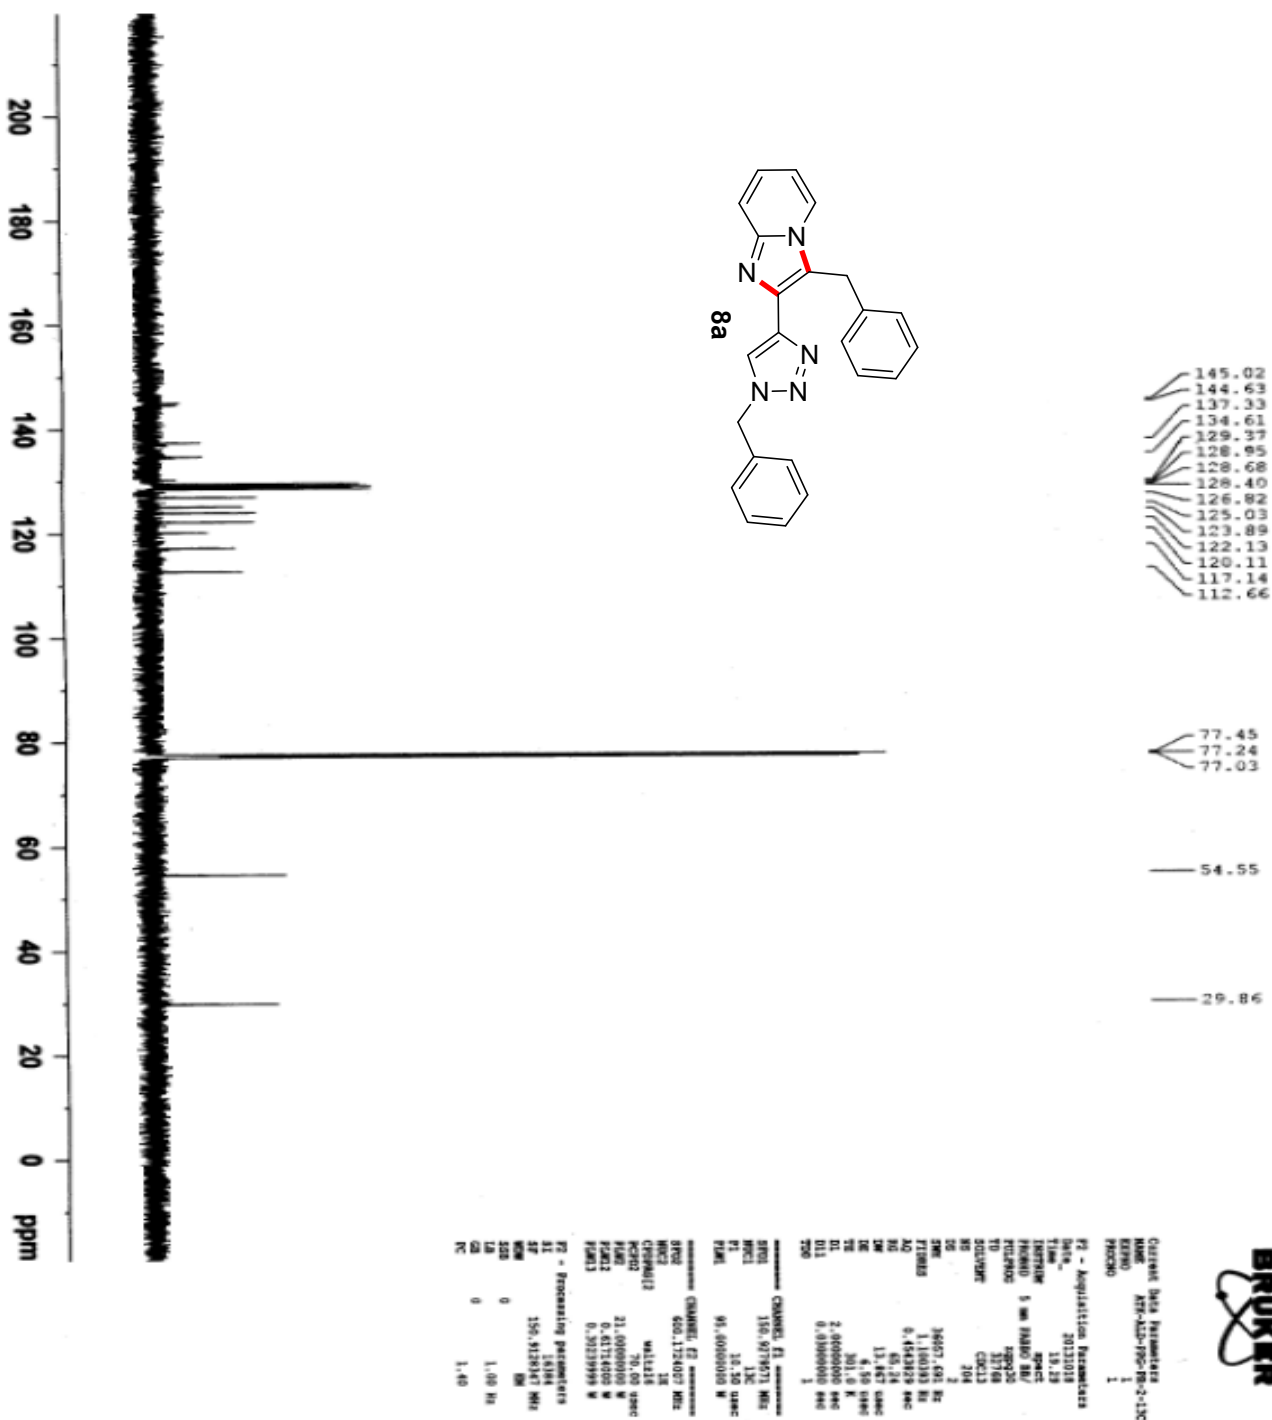

HRMS spectra of 8a

Sample Name ALB-PPG-PR-2R Position -1 Instrument Name Instrument 1 User Name  
 Inj Vol -10 InjPosition ACQ Method Comment SampleType Sample Sample IRM Calibration Status Success  
 Data Filename ALB-PPG-PR-2R.d

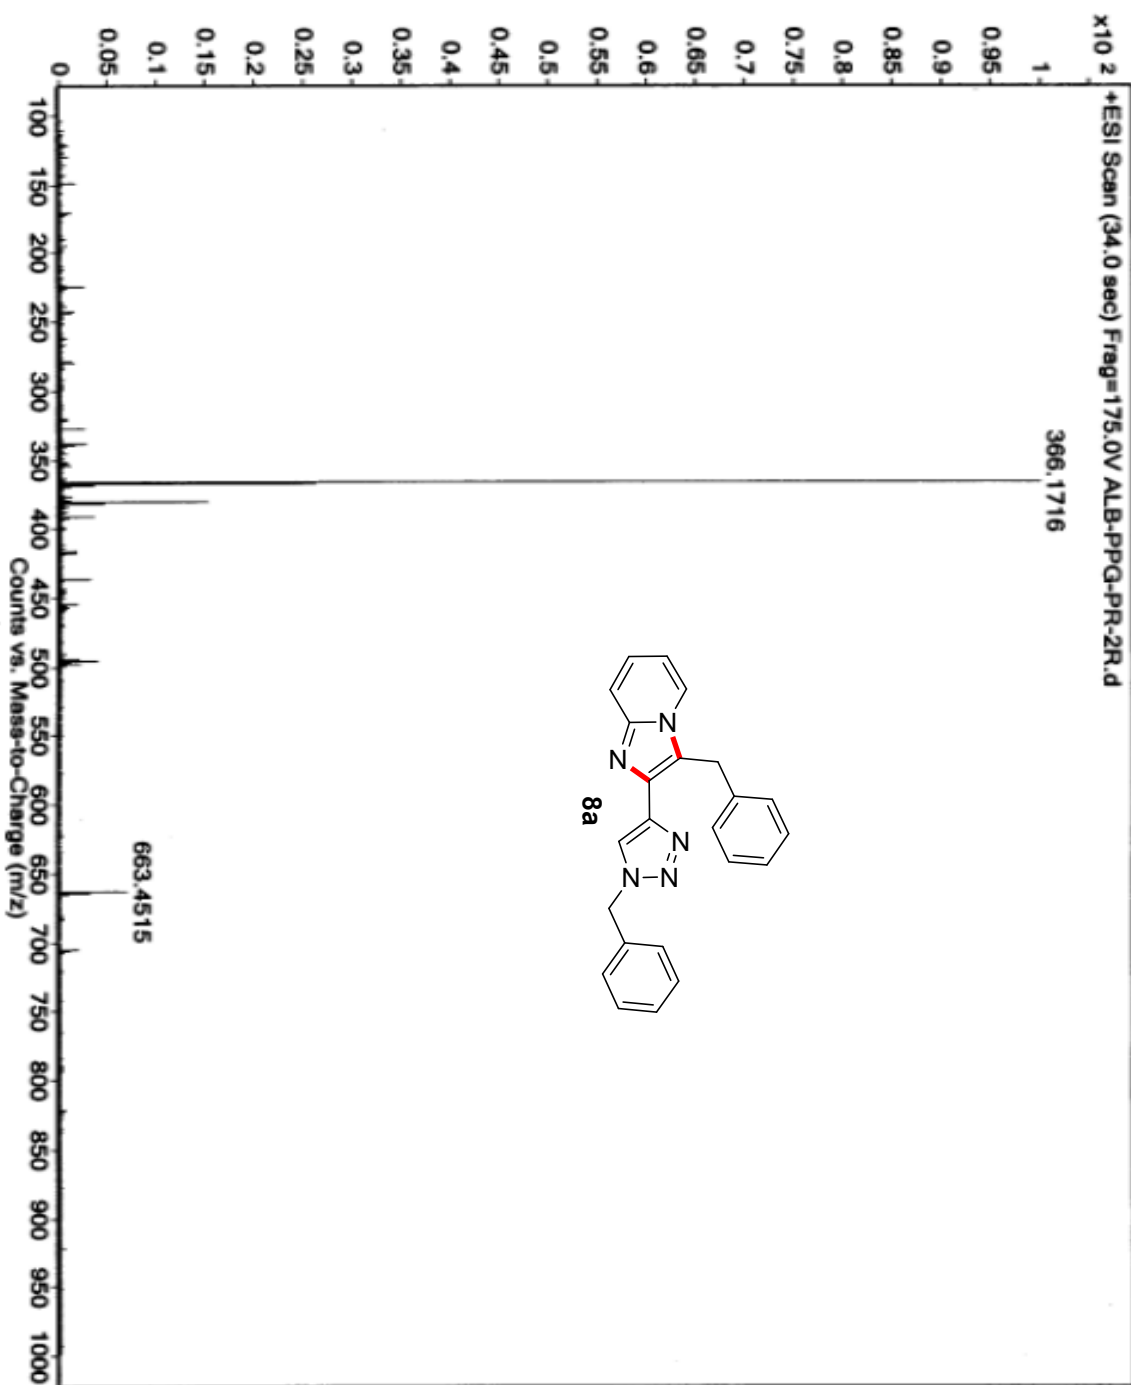

<sup>1</sup>H NMR spectra of **8b**

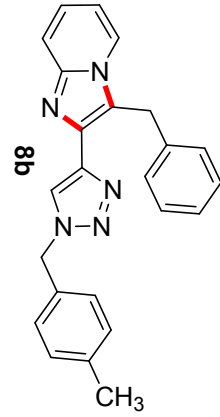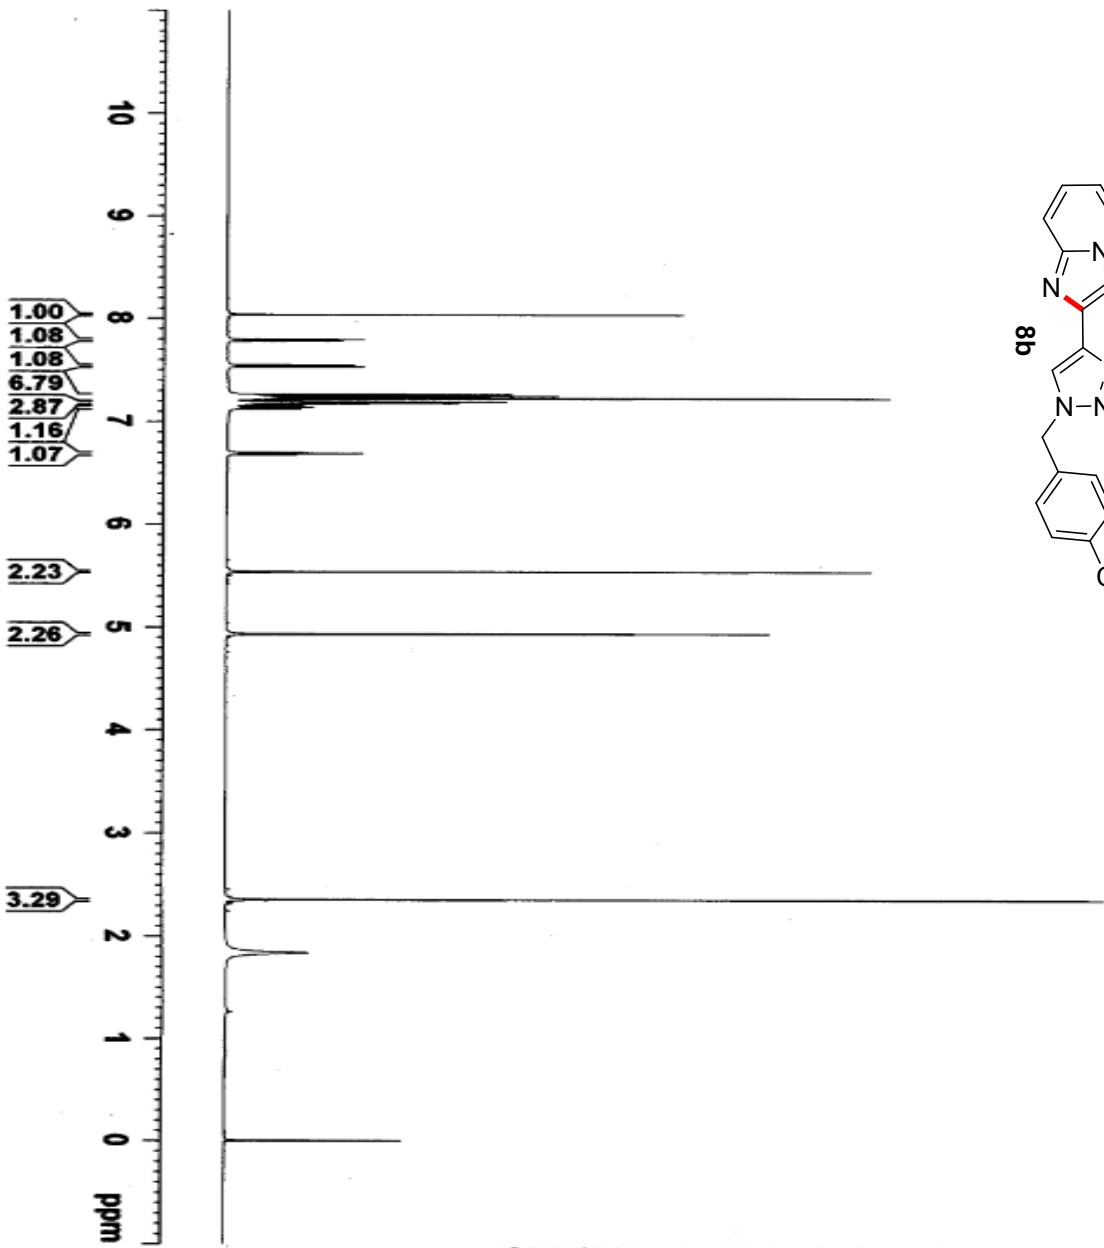

Current Data Parameters  
 NAME ALD-PPG-PN-17\_1H  
 EXPNO 1  
 PROCNO 1

F2 - Acquisition Parameters  
 Date\_ 20140904  
 Time 14.56  
 INSTRUM spect  
 PROBD 5 mm PABBO BB/  
 PULPROG zg30  
 TD 32768  
 SOLVENT CDCl3  
 NS 16  
 DS 2  
 SWH 12019.230 Hz  
 FIDRES 0.366798 Hz  
 AQ 1.3631488 sec  
 RG 89.67  
 DW 41.600 usec  
 DE 6.50 usec  
 TE 299.8 K  
 D1 1.00000000 sec  
 TDO 1

===== CHANNEL f1 =====  
 SFO1 600.1737063 MHz  
 NUC1 1H  
 P1 12.00 usec  
 PL1 21.00000000 W

F2 - Processing parameters  
 SI 16384  
 SF 600.1700141 MHz  
 MDW EN  
 SSB 0  
 LB 0.30 Hz  
 GB 0  
 PC 1.00

<sup>13</sup>C NMR spectra of 8b

Sample Name:  
ALD-PRG-17-13C  
Data Collected on:  
11/19/2014  
Archive directory:

Sample directory:

Yield: ALD-PRG-17-13C

Pulse Sequence: CARRON (4pul)

Solvent: cdcl3

Data collected on: Jan 29 2014

Temp: 25.0 C / 298.1 K

Operator: chm

Relax. delay 1.000 sec

Pulse 45.0 degree

Acq. time 1.304 sec

Width 25125.6 Hz

270 repetitions

OBSERVE C13, 100.6425909 MHz

DECOUPLE H1, 399.8529994 MHz

Power 42 dB

continuously on

WALTZ-16 modulated

DATA PROCESSING

Line broadening 0.5 Hz

FT axis 65536

Total time 2 hr, 17 min

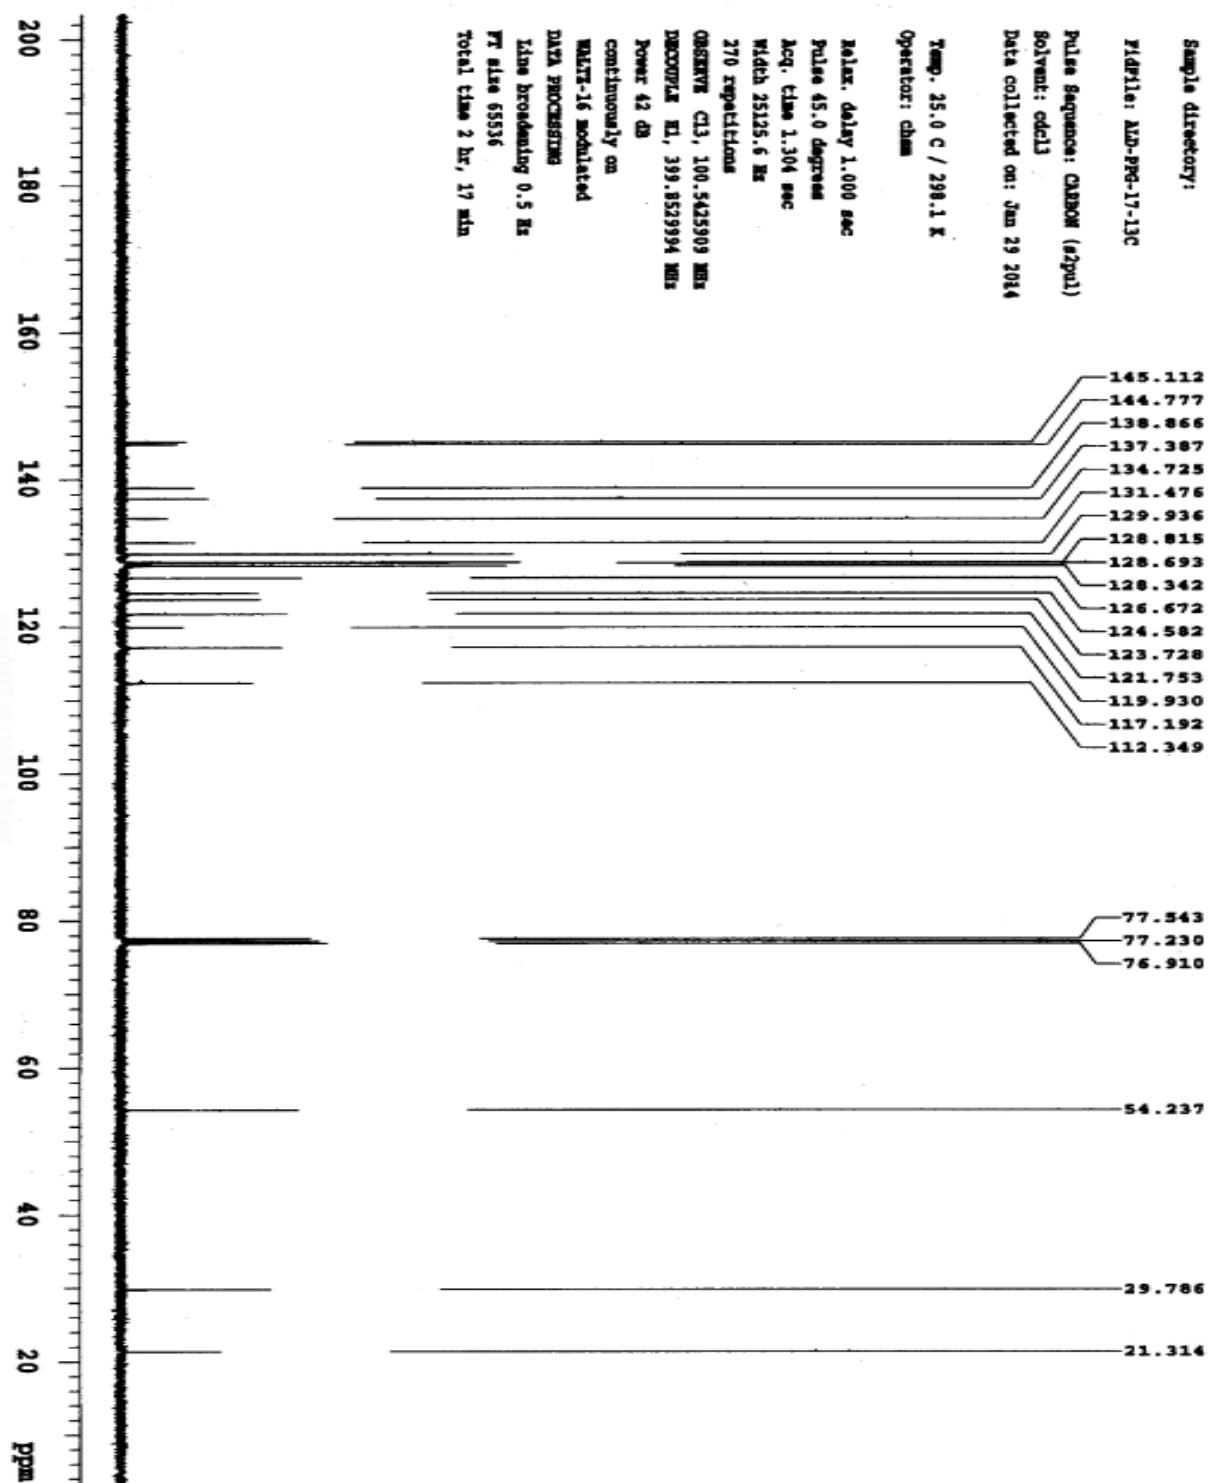

HRMS spectra of 8b

|               |                   |              |    |                 |              |                        |                      |
|---------------|-------------------|--------------|----|-----------------|--------------|------------------------|----------------------|
| Sample Name   | ALD-PPG-PR-17-R   | Position     | -1 | Instrument Name | Instrument 1 | User Name              |                      |
| Inj Vol       | -10               | Inj Position |    | Sample Type     | Sample       | IRM Calibration Status | Success              |
| Data Filename | ALD-PPG-PR-17-R.d | Acq Method   |    | Comment         |              | Acquired Time          | 3/18/2014 2:35:40 PM |

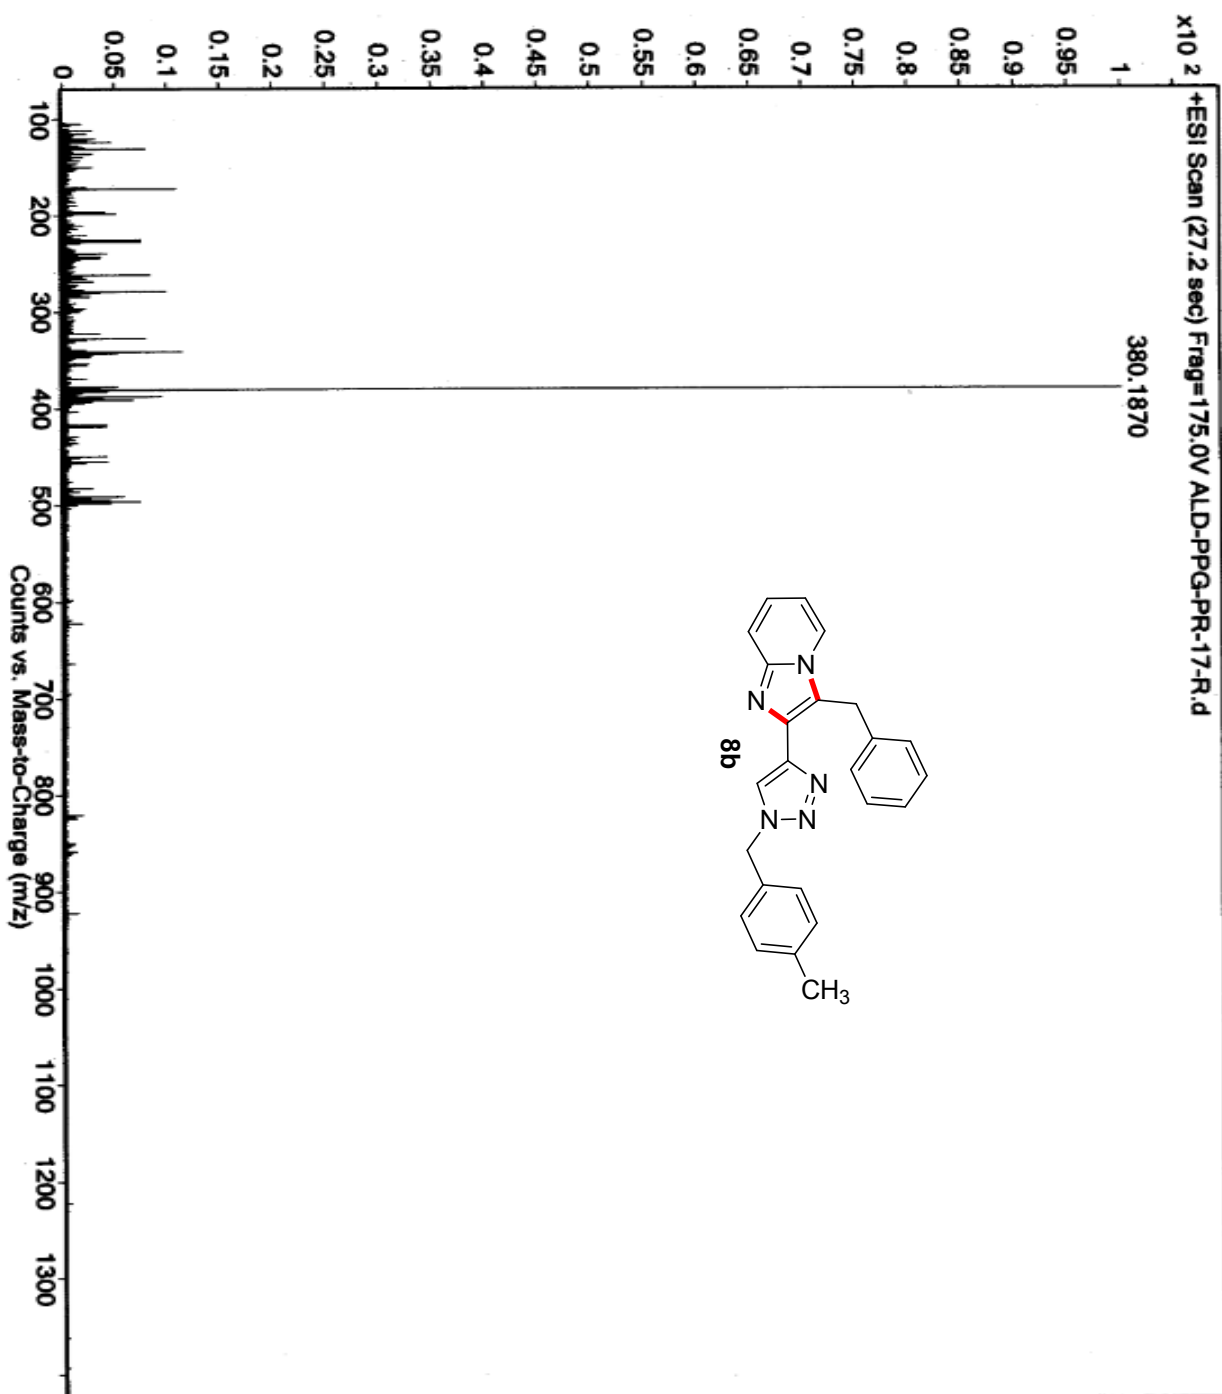



<sup>1</sup>H NMR spectra of **8c**

ALD-PPG-PR-1  
Sample Name:  
ALD-PPG-PR-1  
Data Collected on:  
ITG-NMR-mercury400  
Archive directory:  
/export/home/chempack/vmmrsvs/data  
Sample directory:

FIDFile: ALD-PPG-PR-1  
Pulse Sequence: PROTON (s2pul)  
Solvent: cdcl3  
Data collected on: Mar 18 2014

Temp. 25.0 C / 298.1 K  
Operator: chem  
Relax. delay 1.000 sec  
Pulse 45.0 degrees  
Acq. time 2.561 sec  
Width 6398.0 Hz  
32 repetitions  
OBSERVE H1, 399.850929 MHz  
DATA PROCESSING  
PT size 32768  
Total time 2 min 12 sec

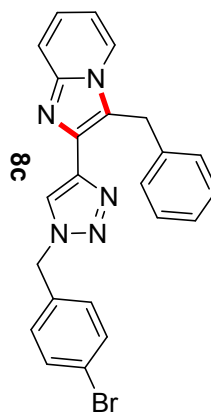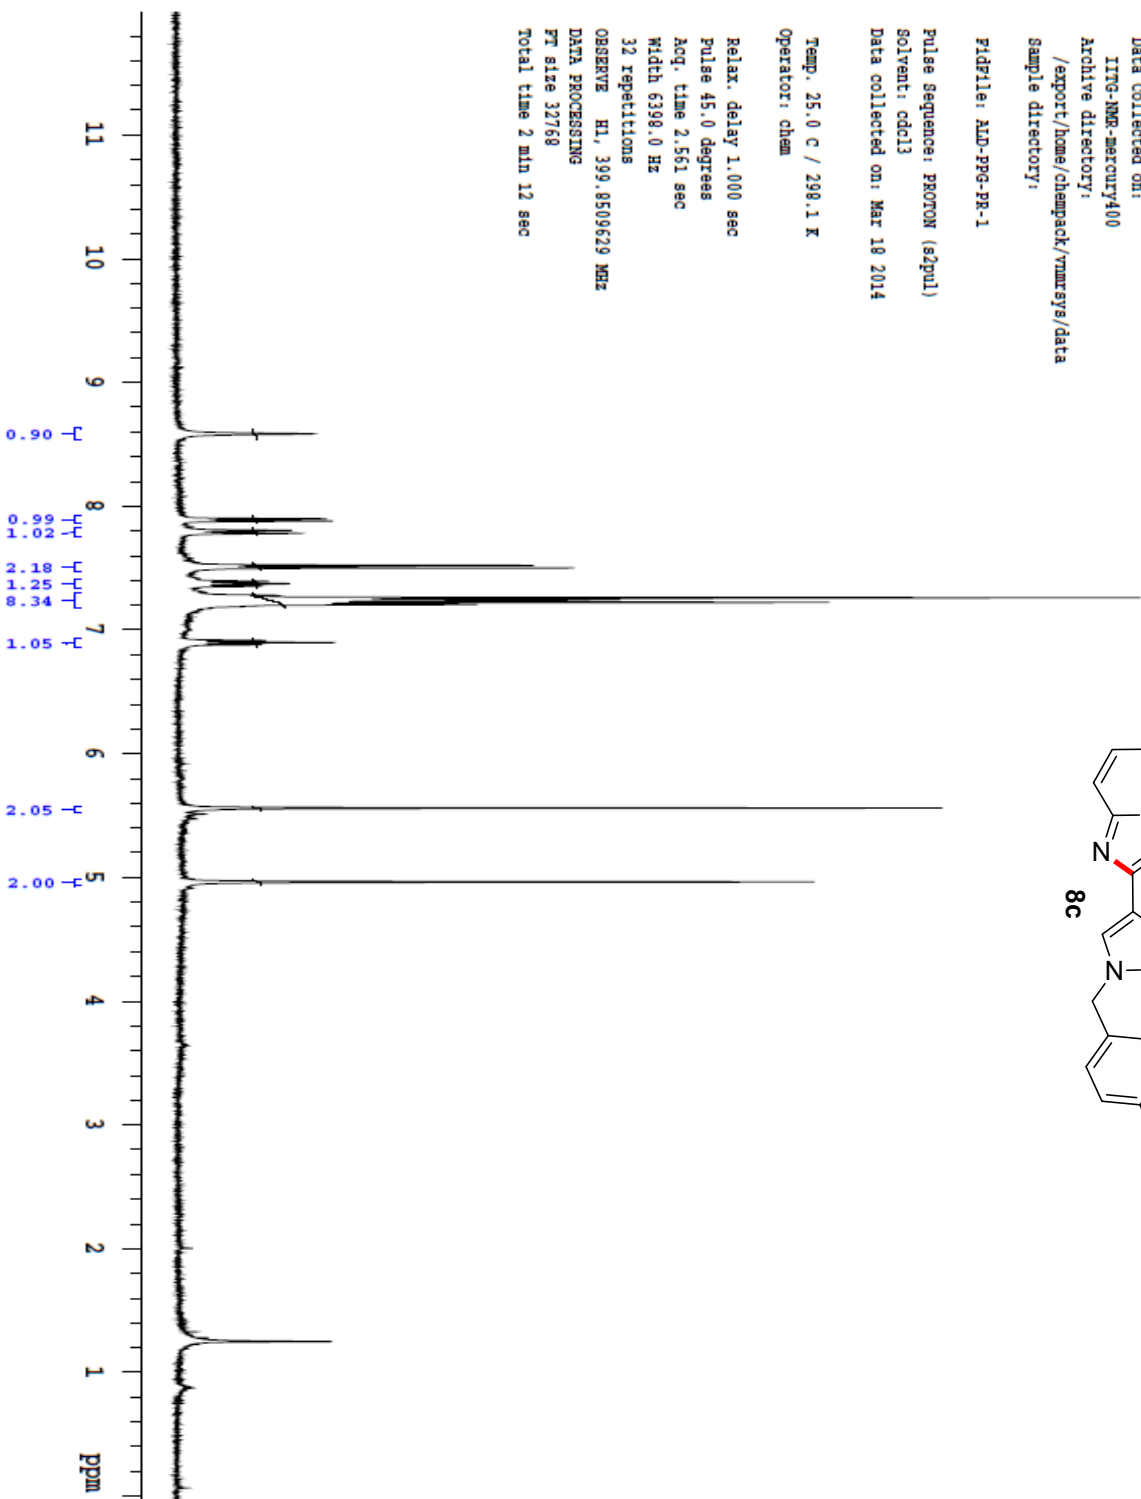

<sup>13</sup>C NMR spectra of **8c**

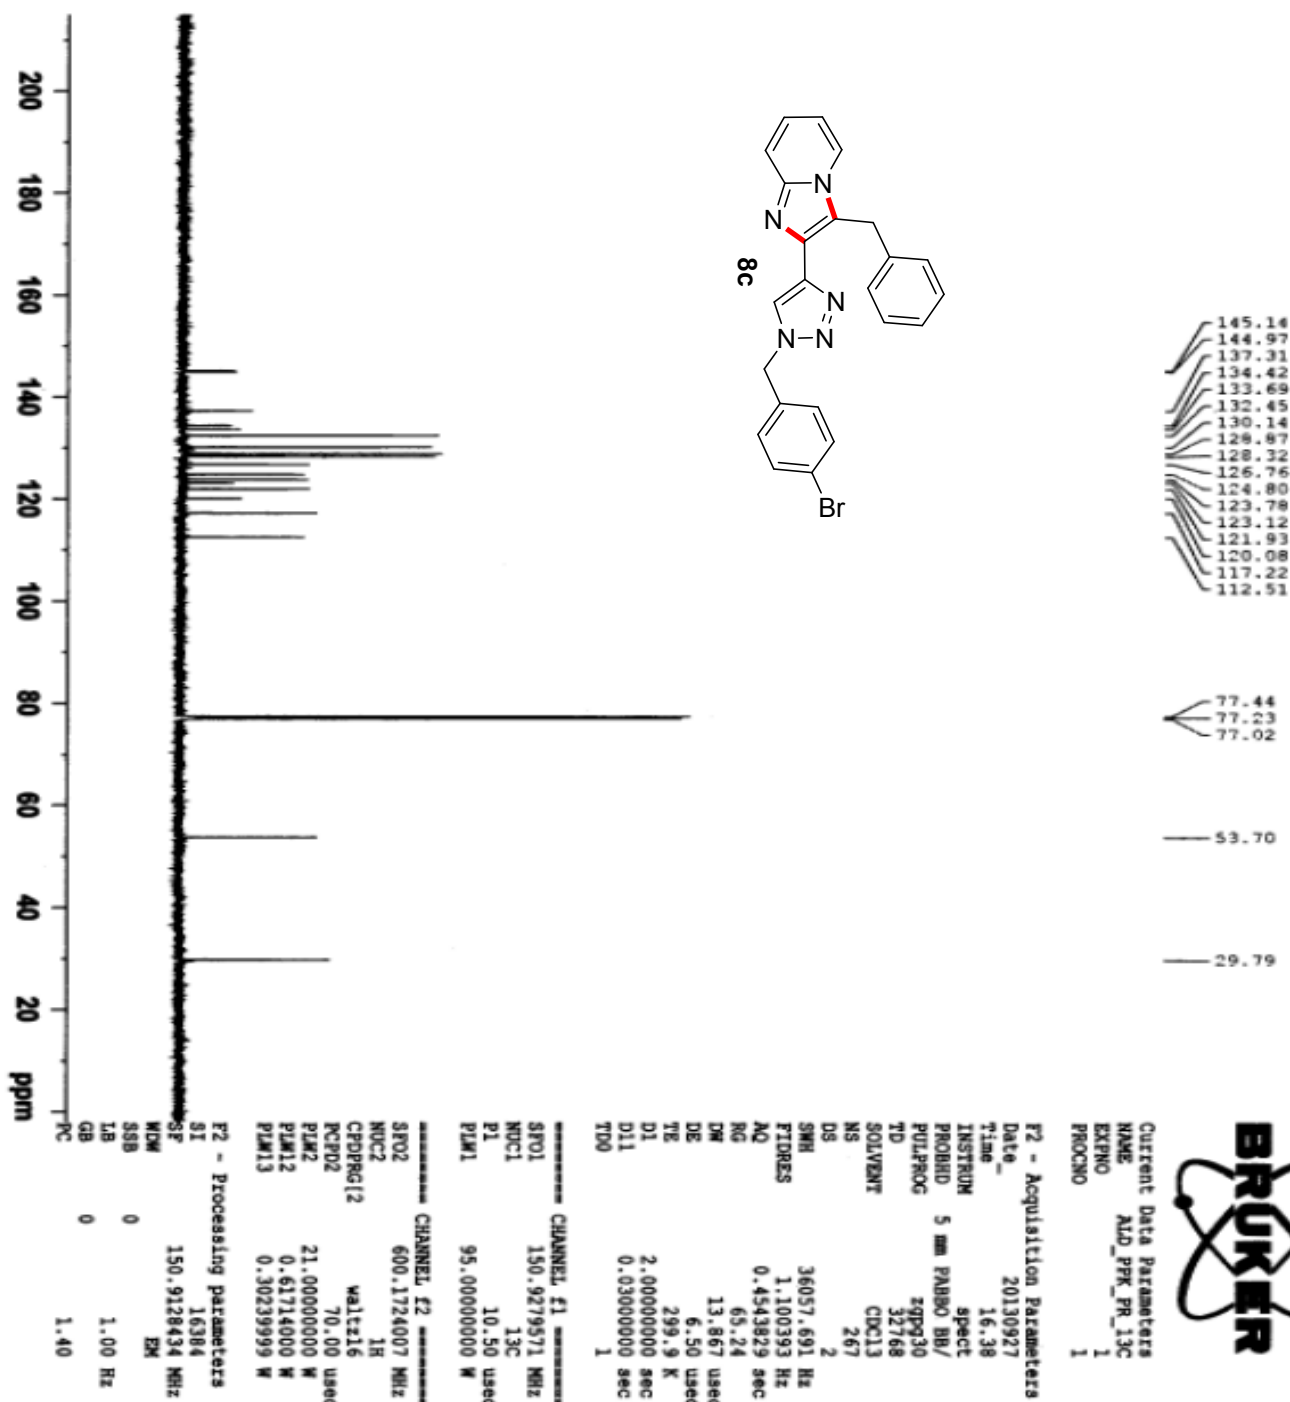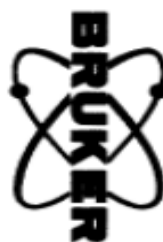

HRMS spectra of 8c

|               |                  |             |    |                 |              |                        |                   |
|---------------|------------------|-------------|----|-----------------|--------------|------------------------|-------------------|
| Sample Name   | ALD-PPG-PR-1-R   | Position    | -1 | Instrument Name | Instrument 1 | User Name              | Success           |
| Inj Vol       | -10              | InjPosition |    | SampleType      | Sample       | ITM Calibration Status |                   |
| Data Filename | ALD-PPG-PR-1-R.d | Acq Method  |    | Comment         |              | Acquired Time          | 3/18/2014 2:43:23 |

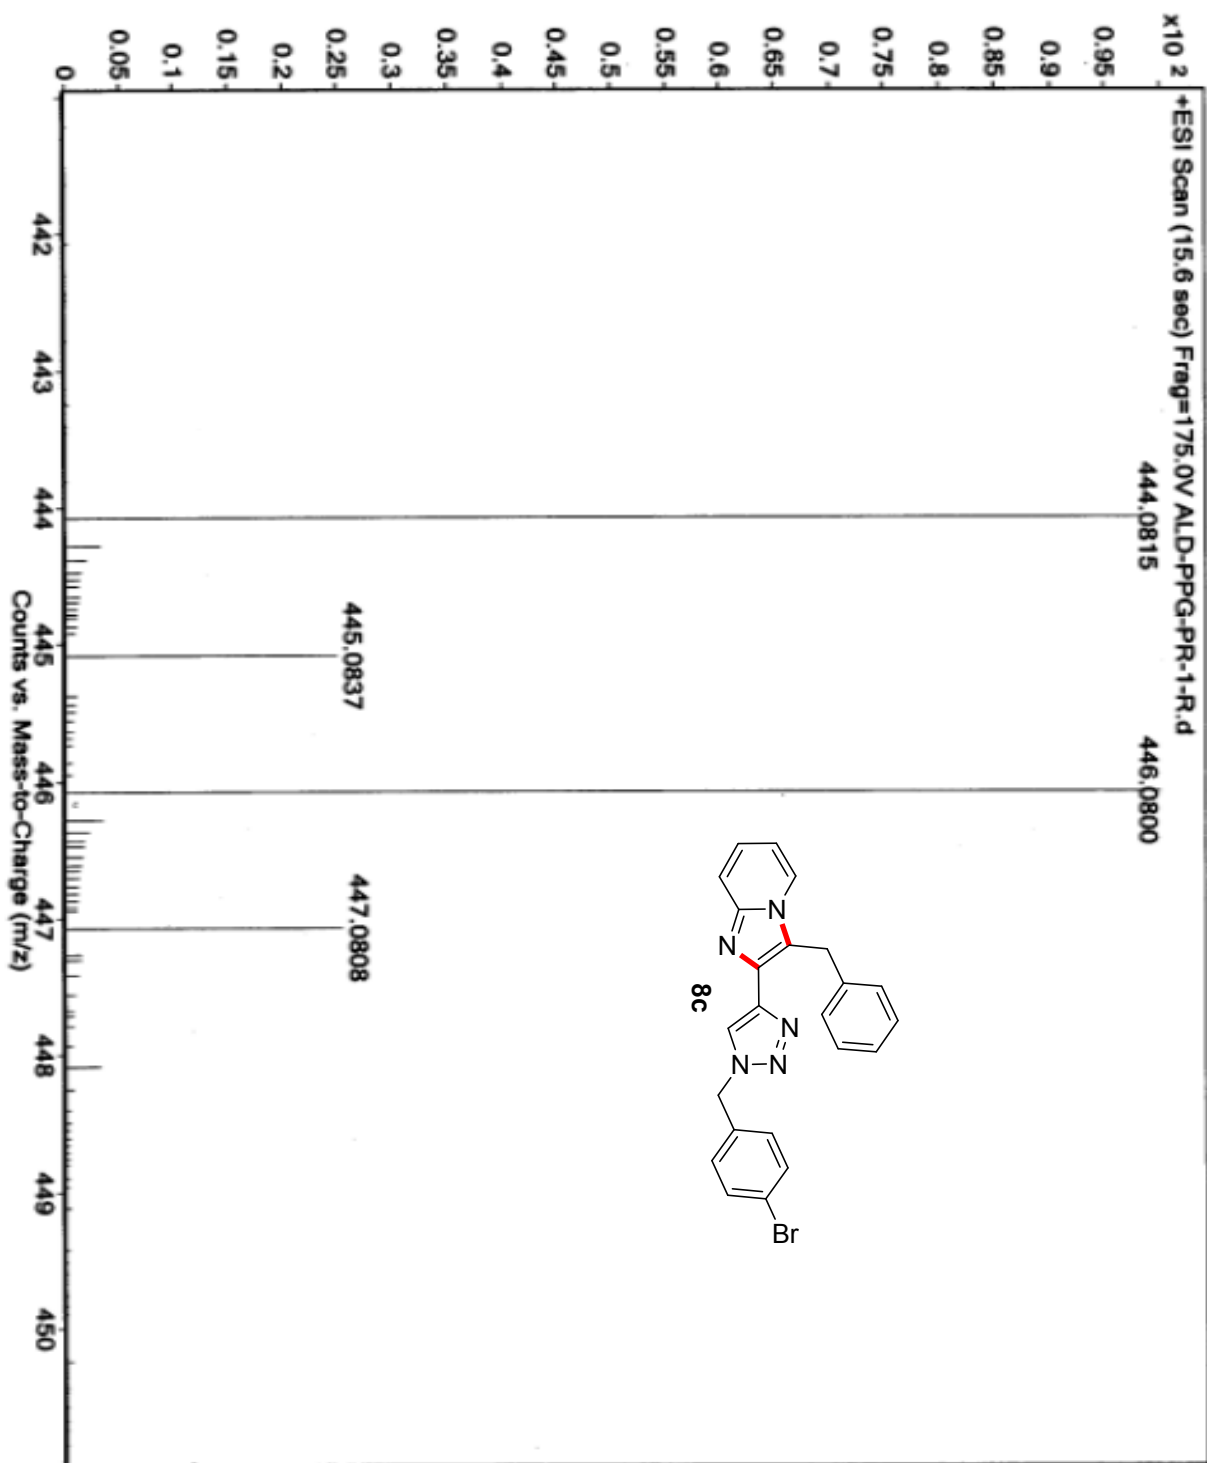

<sup>1</sup>H NMR spectra of 8d

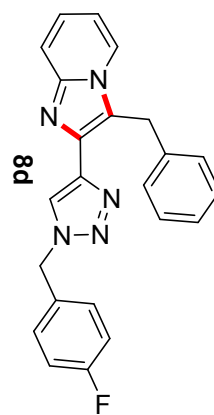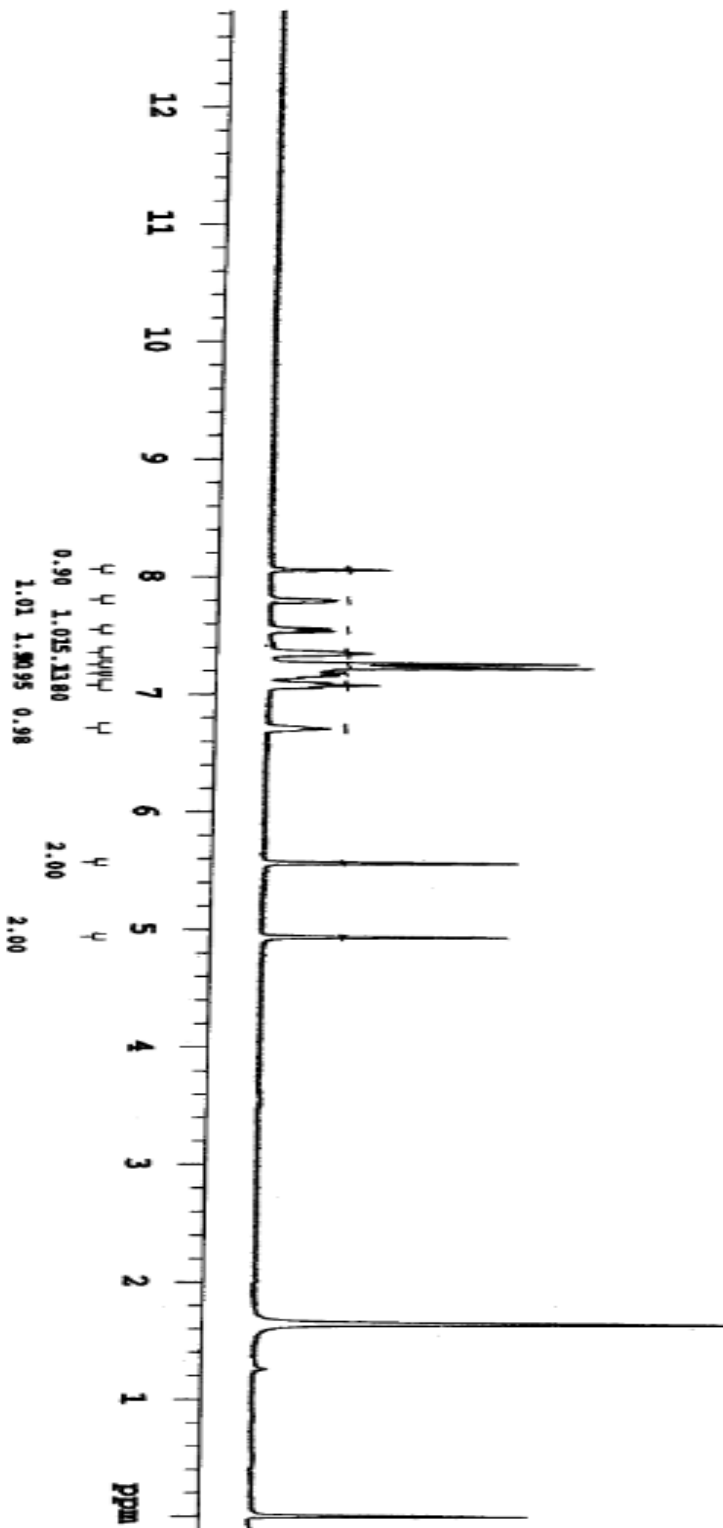

|                                                                                                                                         |                                |                                                                 |                                                                                                                                             |
|-----------------------------------------------------------------------------------------------------------------------------------------|--------------------------------|-----------------------------------------------------------------|---------------------------------------------------------------------------------------------------------------------------------------------|
| <b>PULSE PROGRAM</b> : 138P2<br>Relax. delay 1.000 sec<br>Pulse 45.0 degree<br>Acq. time 2.561 sec<br>Width 6398.0 Hz<br>32 repetitions | <b>OBSERVE</b> H1, 319.8509629 | <b>DATA PROCESSING</b><br>FT also 32768<br>Total time 1 minutes | <b>ALD-PPQ-PR-5</b><br>Solvent: cdcl3<br>Temp. 25.0 C / 298.1 K<br>Operator: chuan<br>File: ALD-PPQ-PR-5_PROTON_01<br>Mercury-400 *ITV-NMR* |
|-----------------------------------------------------------------------------------------------------------------------------------------|--------------------------------|-----------------------------------------------------------------|---------------------------------------------------------------------------------------------------------------------------------------------|

<sup>13</sup>C NMR spectra of **8d**

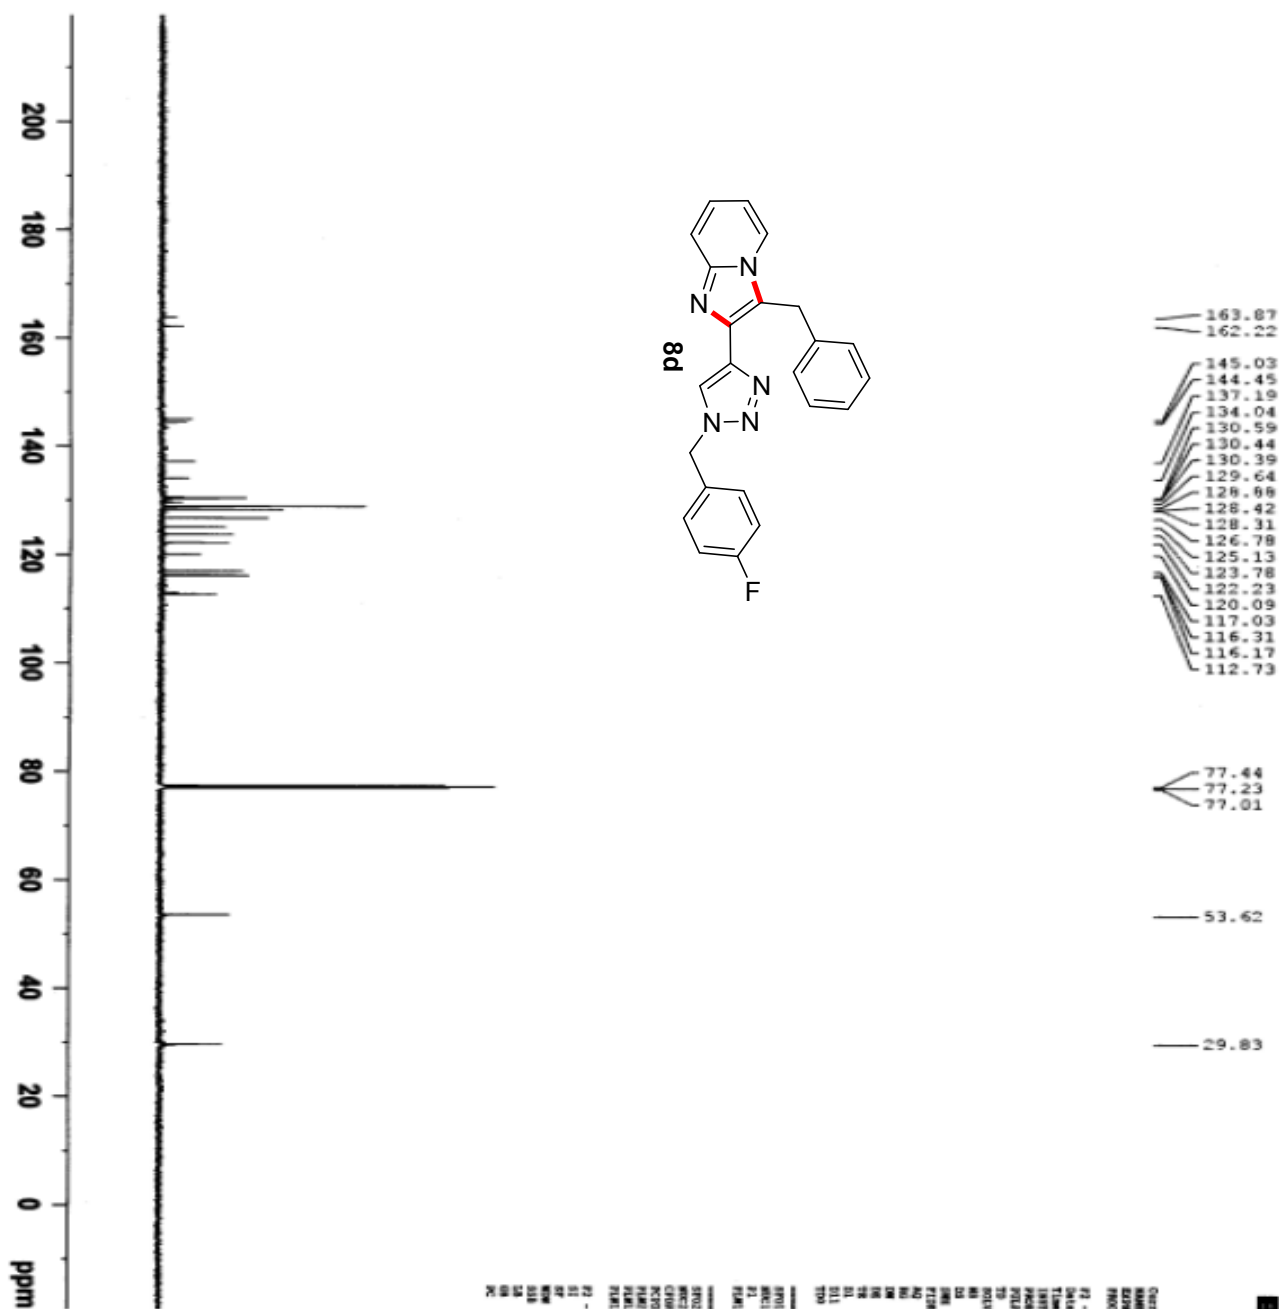

Current Data Parameters  
 Name: 20131021  
 Date\_: 20131021  
 Time: 20:57  
 Acquisition: 5 mm HASTE  
 Processing: 17548  
 F2 - Acquisition Parameters  
 Date\_: 20131021  
 Time: 20:57  
 Acquisition: 5 mm HASTE  
 Processing: 17548  
 F2 - Processing parameters  
 SI: 16384  
 SF: 125.517425 MHz  
 AQ: 0.50000000 sec  
 FIDRES: 0.120229989 Hz  
 AQRES: 0.120229989 Hz  
 CHANNEL f1  
 NUC1: 13C  
 P1: 12.00 usec  
 PL1: 0.00000000 W  
 CHANNEL f2  
 NUC2: 1H  
 P2: 70.00 usec  
 PL2: 0.00000000 W  
 PL12: 0.43148000 W  
 PL123: 0.20229989 W  
 SI: 16384  
 SF: 125.517425 MHz  
 AQ: 0.50000000 sec  
 FIDRES: 0.120229989 Hz  
 AQRES: 0.120229989 Hz

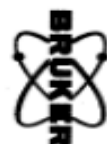

HRMS spectra of 8d

|               |                  |             |    |                 |              |                       |                      |
|---------------|------------------|-------------|----|-----------------|--------------|-----------------------|----------------------|
| Sample Name   | ALD-PPG-PR-5-R   | Position    | -1 | Instrument Name | Instrument 1 | User Name             |                      |
| Inj Vol       | -10              | InjPosition |    | SampleType      | Sample       | RM Calibration Status | Success              |
| Data Filename | ALD-PPG-PR-5-R.d | Acq Method  |    | Comment         |              | Acquired Time         | 3/18/2014 2:37:12 PM |

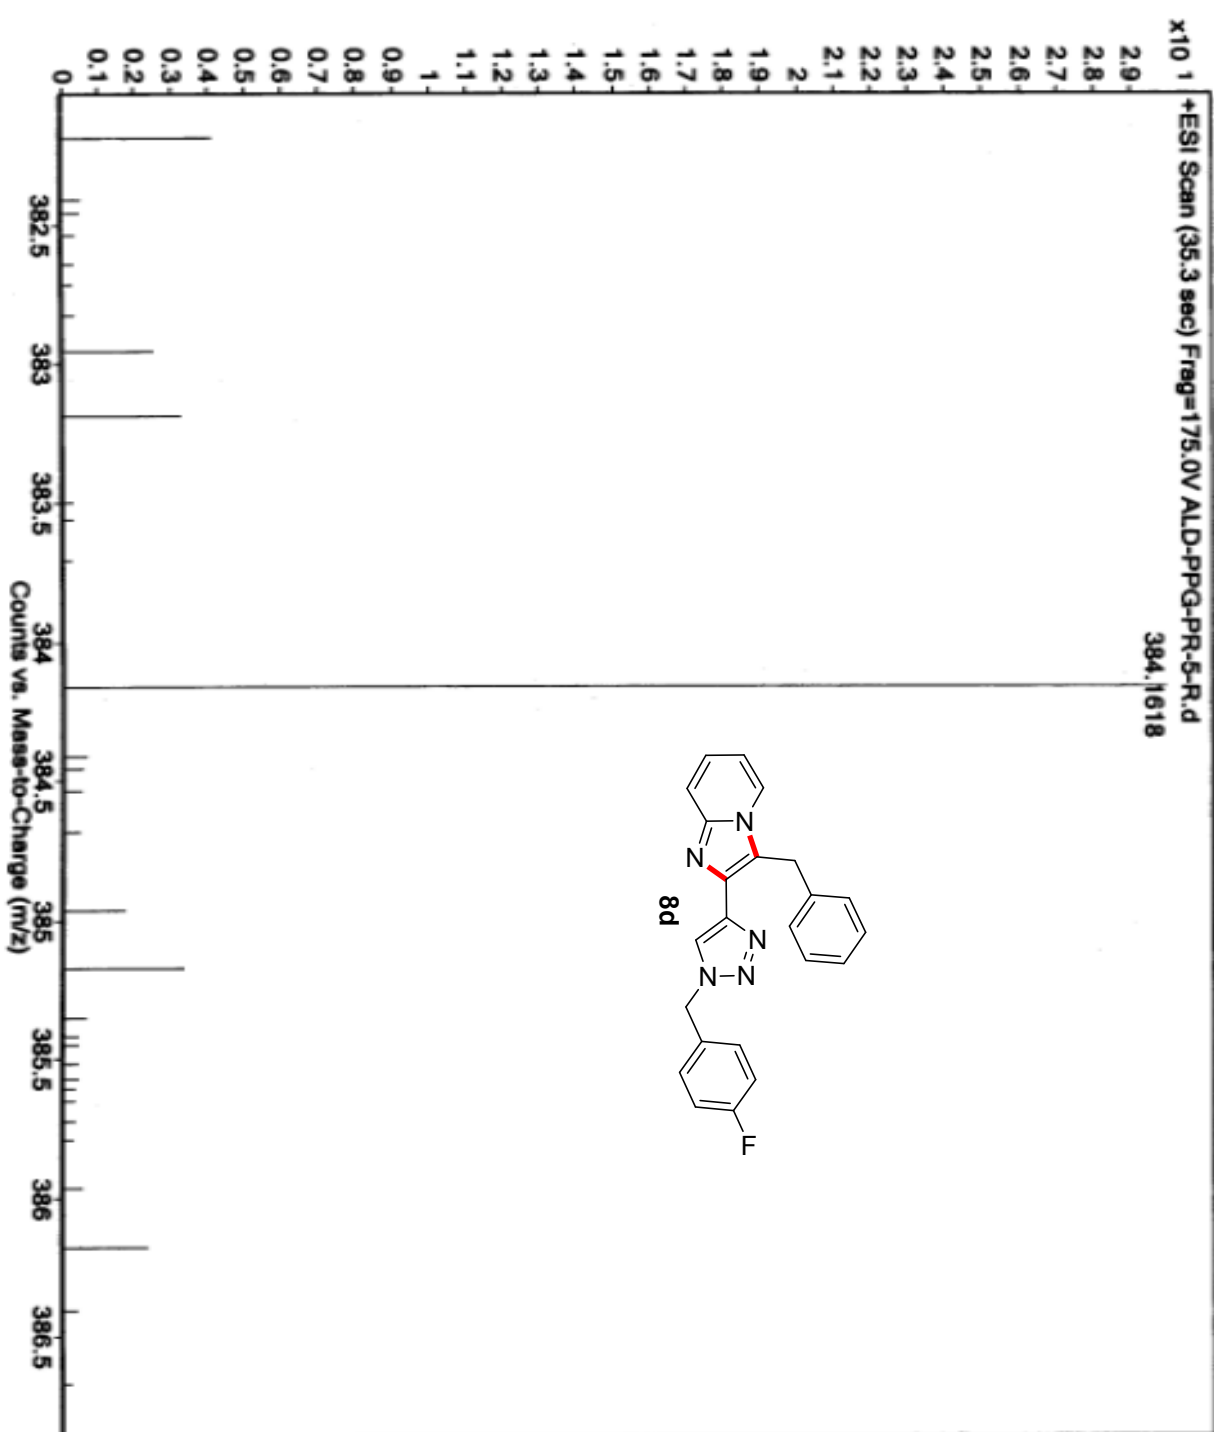

<sup>1</sup>H NMR spectra of 8e

Sample Name: ALD-PP9-PP-14  
Data Collected on: 11/9-2013-mercury400  
Acquire directory:  
Sample directory:  
F1/DIR1: PP9PP  
Pulse sequence: PP9PP (zgpg3)  
Solvent: cdcl3  
Data collected on: Dec 30 2013  
Temp: 25.0 C / 298.1 K  
Operator: chm  
Relax. delay: 1.000 sec  
Pulse: 45.0 degrees  
Acq. time: 2.561 sec  
Width: 6398.0 Hz  
32 repetitions  
CONVERT HI, 399.4509871 MHz  
DATA PROCESSING  
PT file: 23768  
Total time: 2 min 12 sec

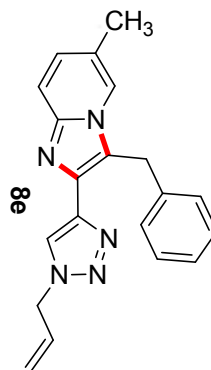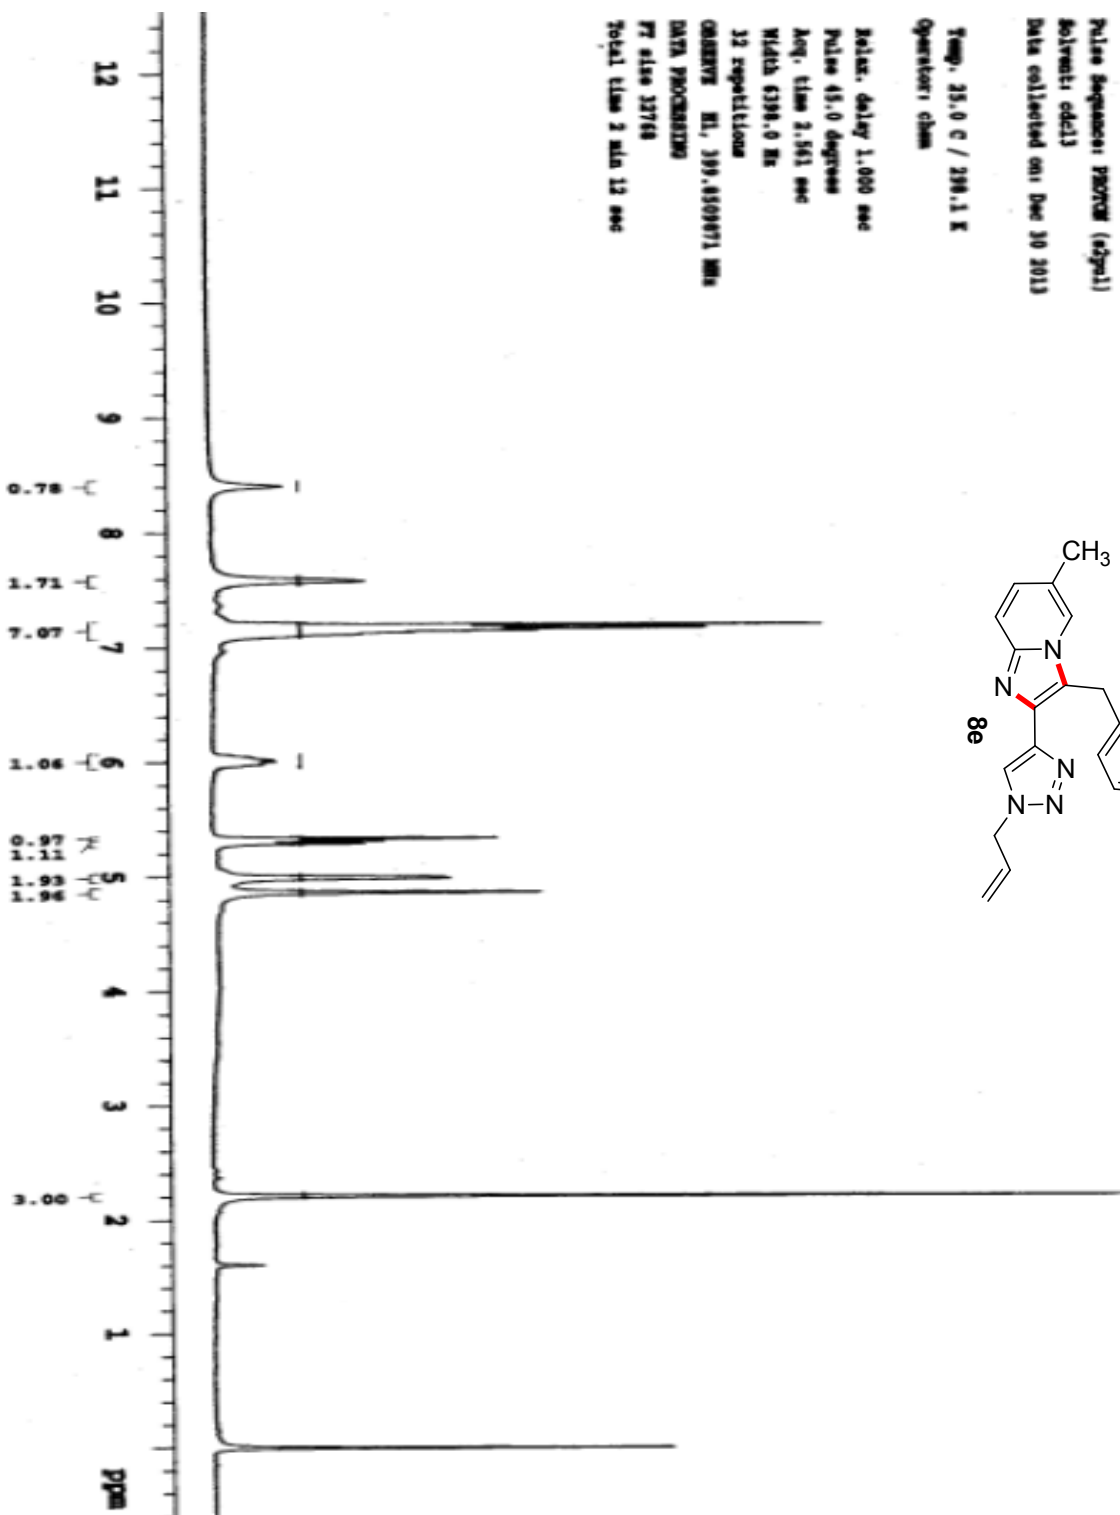

<sup>13</sup>C NMR spectra of **8e**

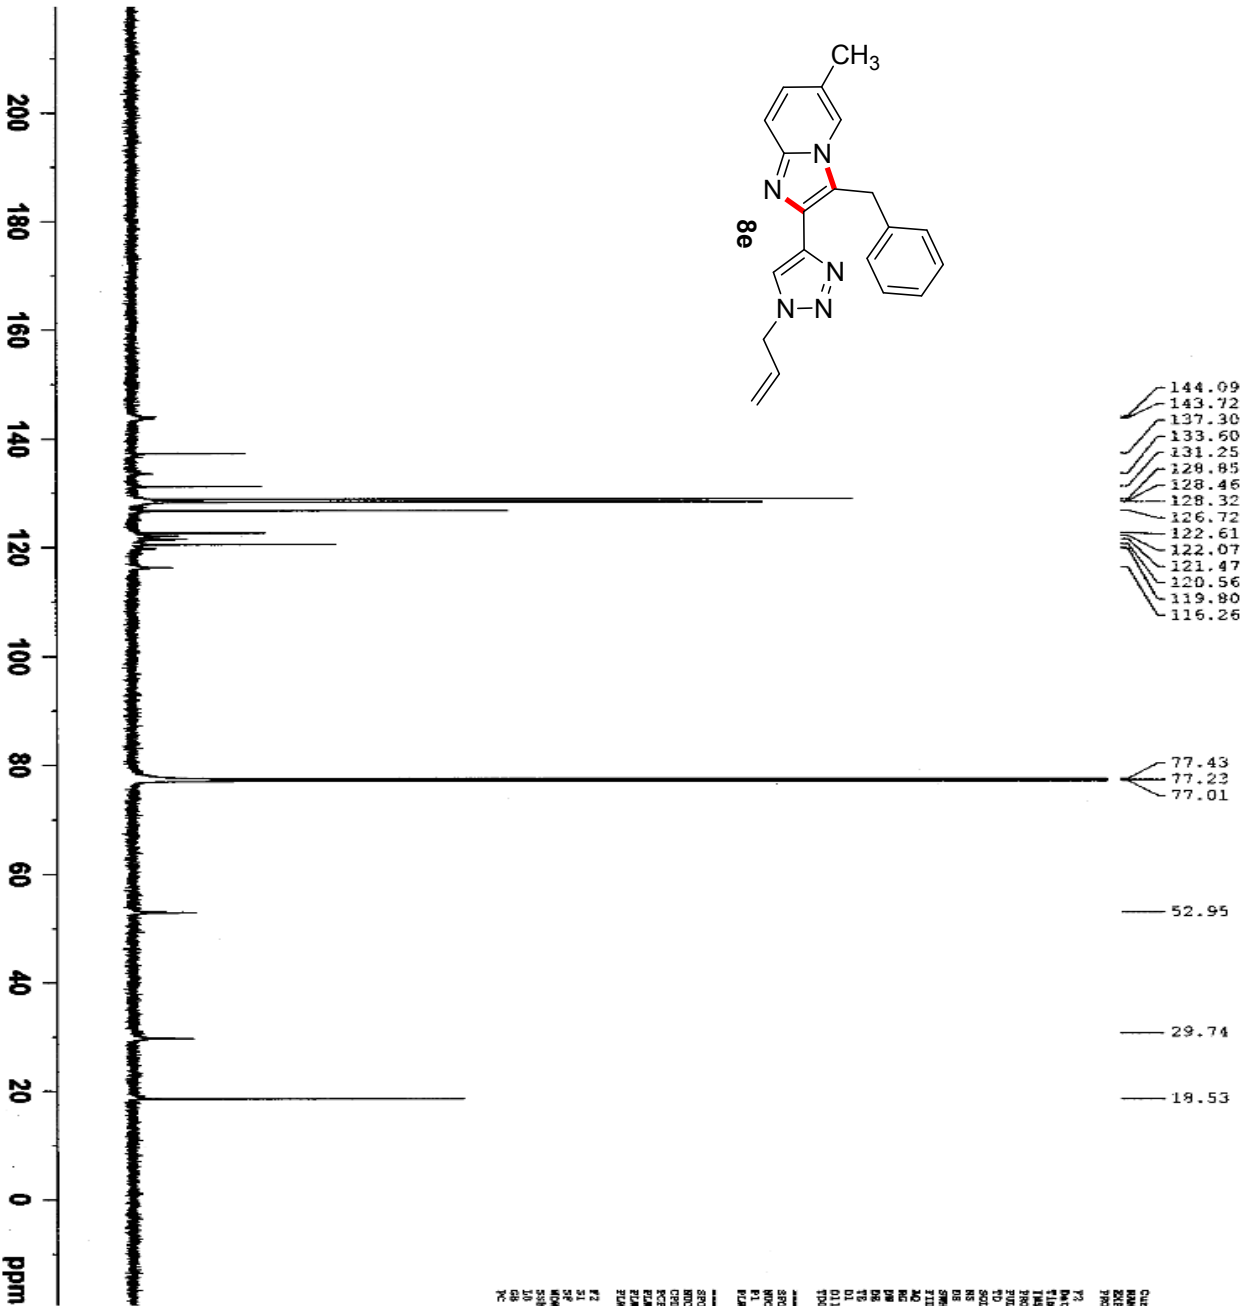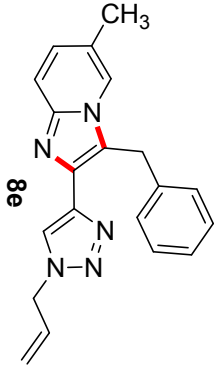

- 144.09
- 143.72
- 137.30
- 133.60
- 131.25
- 129.85
- 128.46
- 128.32
- 126.72
- 122.61
- 122.07
- 121.47
- 120.56
- 119.80
- 116.26

- 77.43
- 77.23
- 77.01

- 52.95

- 29.74

- 18.53

Current Data Parameters  
 Name ALI-PR-78-148\_13C  
 ExpNo 1  
 ProcNo 1

% - Acquisition Parameters  
 Date\_ 20140113  
 Time 13.44  
 Instrument spect  
 Processor 5 m PABBO 817  
 F2 31148  
 F1 31148  
 TD 32768  
 SFO 150  
 SOLVENT CDCl3  
 NS 1348  
 DS 2  
 SWH 36031.651 Hz  
 FWHM 1342.323 Hz  
 AQ 0.444132 sec  
 RG 63.24  
 PW 13.887 usec  
 DE 6.50 usec  
 TE 300.2 K  
 D1 2.0000000 sec  
 D11 0.3000000 sec  
 TPO

===== CHANNEL f1 =====  
 SFO1 150.9279571 MHz  
 WC1 1K  
 FID 16.26 usec  
 FFL1 95.0000000 M

===== CHANNEL f2 =====  
 SFO2 600.1724007 MHz  
 WC2 1K  
 FID 16.26 usec  
 FFL2 95.0000000 M

===== CHANNEL f3 =====  
 SFO3 600.1724007 MHz  
 WC3 1K  
 FID 16.26 usec  
 FFL3 95.0000000 M

===== CHANNEL f4 =====  
 SFO4 600.1724007 MHz  
 WC4 1K  
 FID 16.26 usec  
 FFL4 95.0000000 M

===== CHANNEL f5 =====  
 SFO5 600.1724007 MHz  
 WC5 1K  
 FID 16.26 usec  
 FFL5 95.0000000 M

F2 - Processing parameters  
 SI 150.9124477 MHz  
 SF 600.1724007 MHz  
 WDW EM  
 SSB 0  
 GB 0  
 PC 1.40

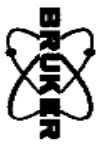



HRMS spectra of 8e

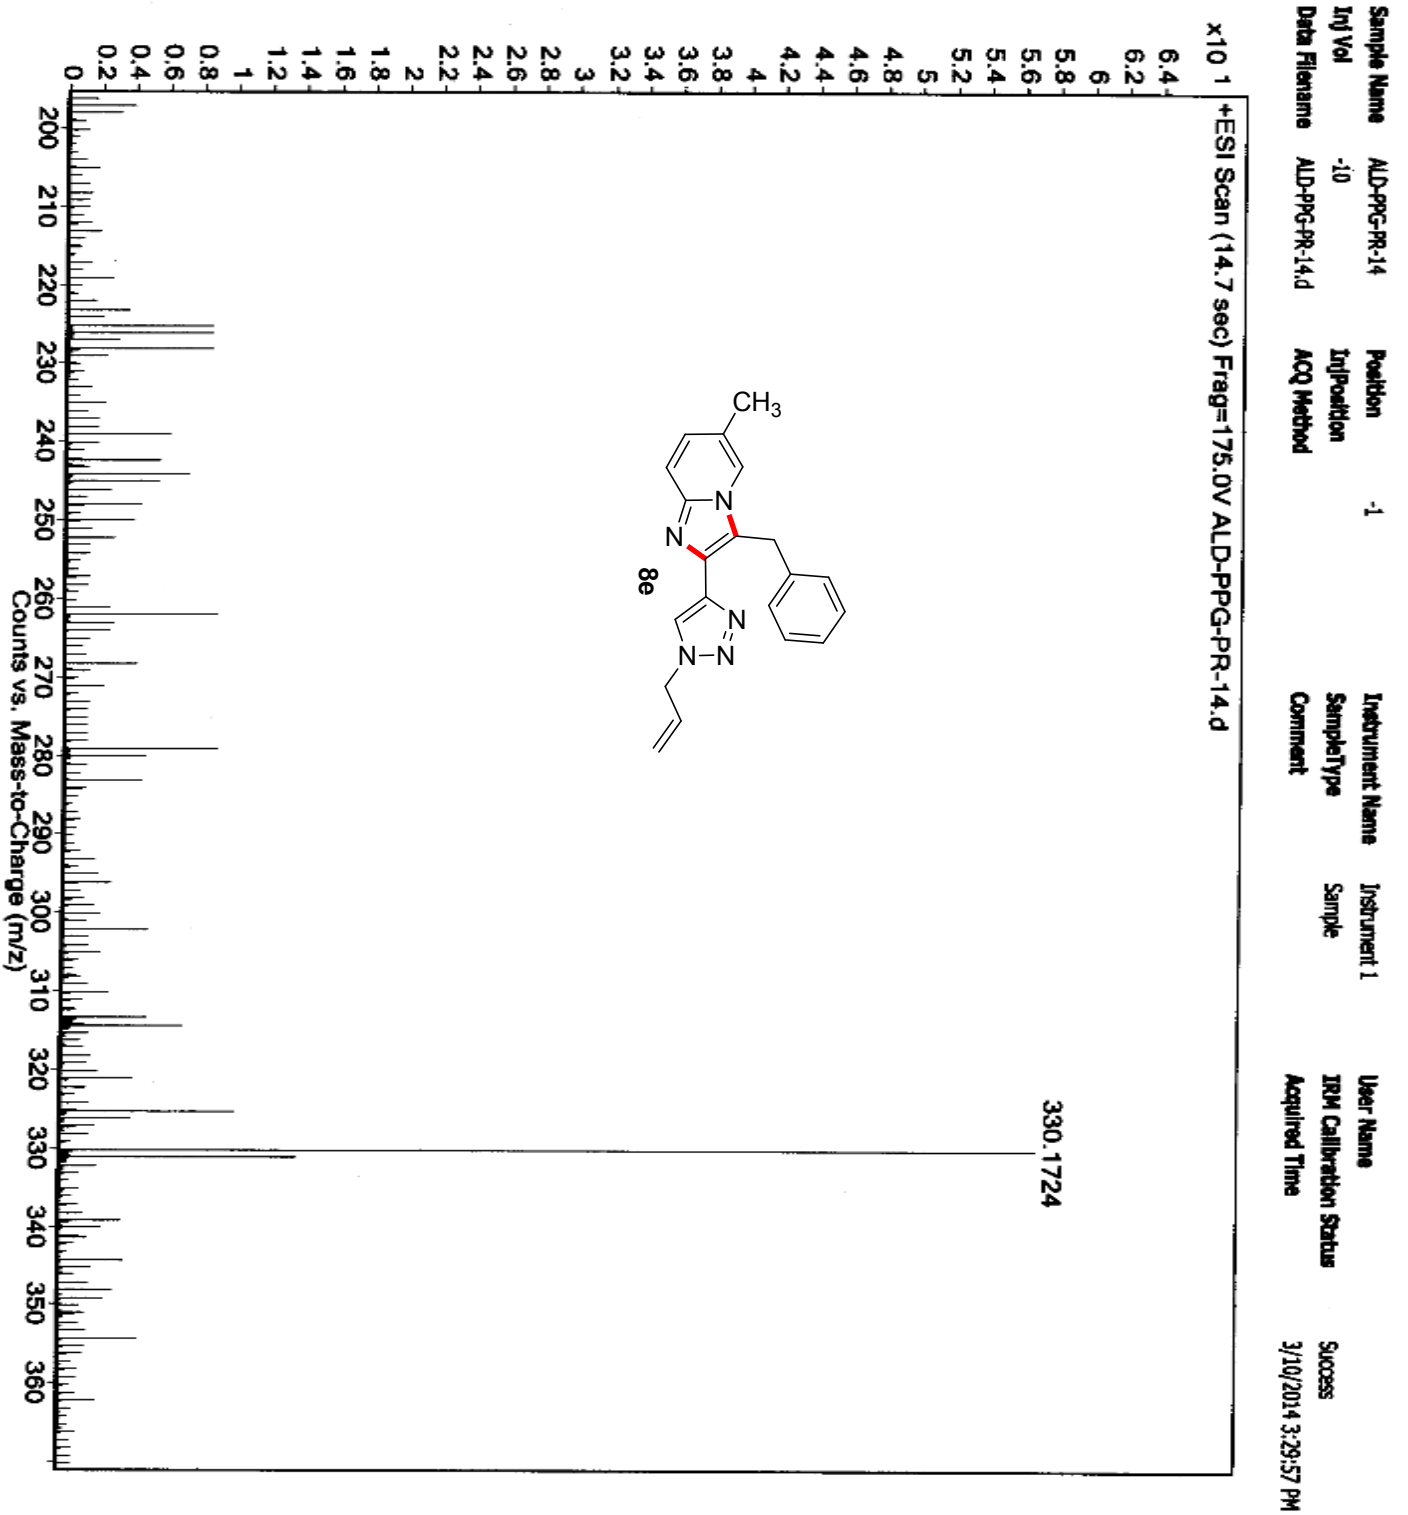

<sup>1</sup>H NMR spectra of **8f**

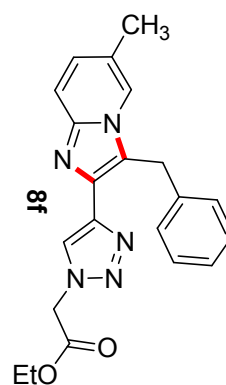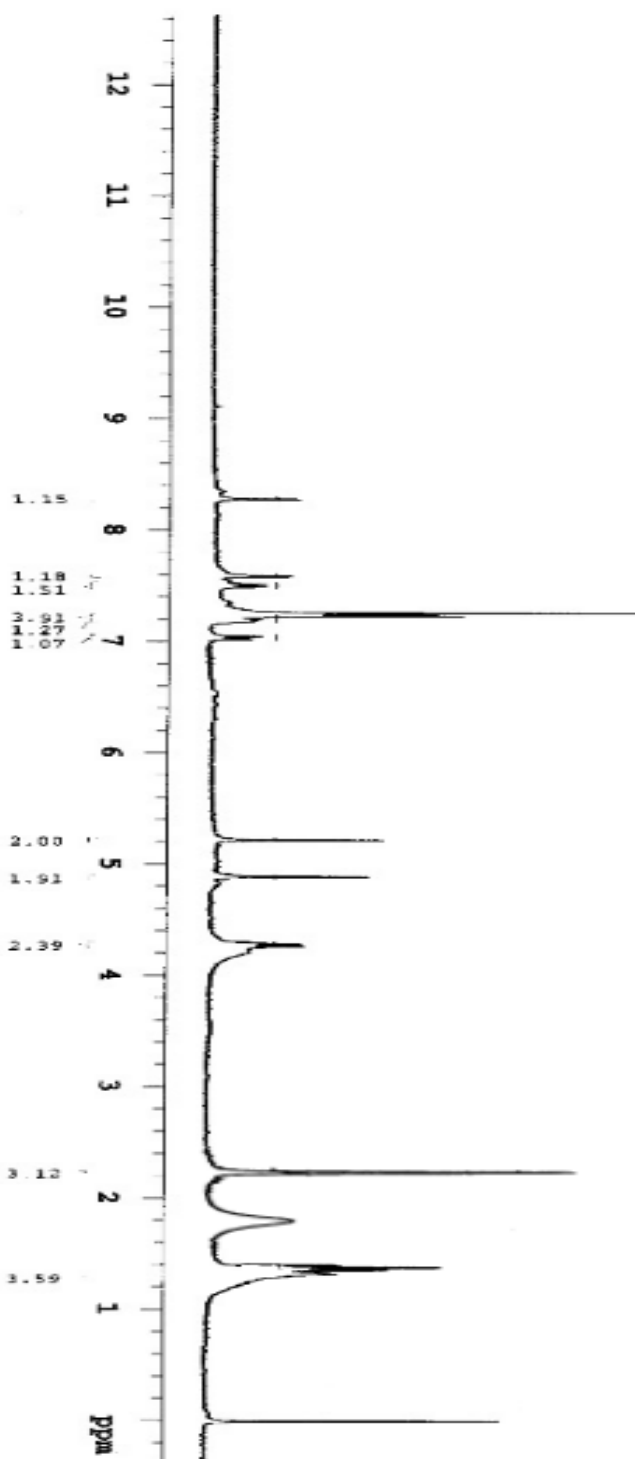

INSTRUMENT: spect  
 Relax. delay 1.000 sec  
 Pulse 45.0° degrees  
 Acq. time 2.561 sec  
 Width 6398.0 Hz  
 32 repetitions

DATA PROCESSING  
 FT size 32768  
 Total time 1 minutes

ALD-PRO-25-26  
 Solvent: cdcl3  
 Temp: 25.0 C / 298.1 K  
 Operator: chm  
 File: ALD-PRO-25  
 Mercury-400 1170-MHz

<sup>13</sup>C NMR spectra of **8f**

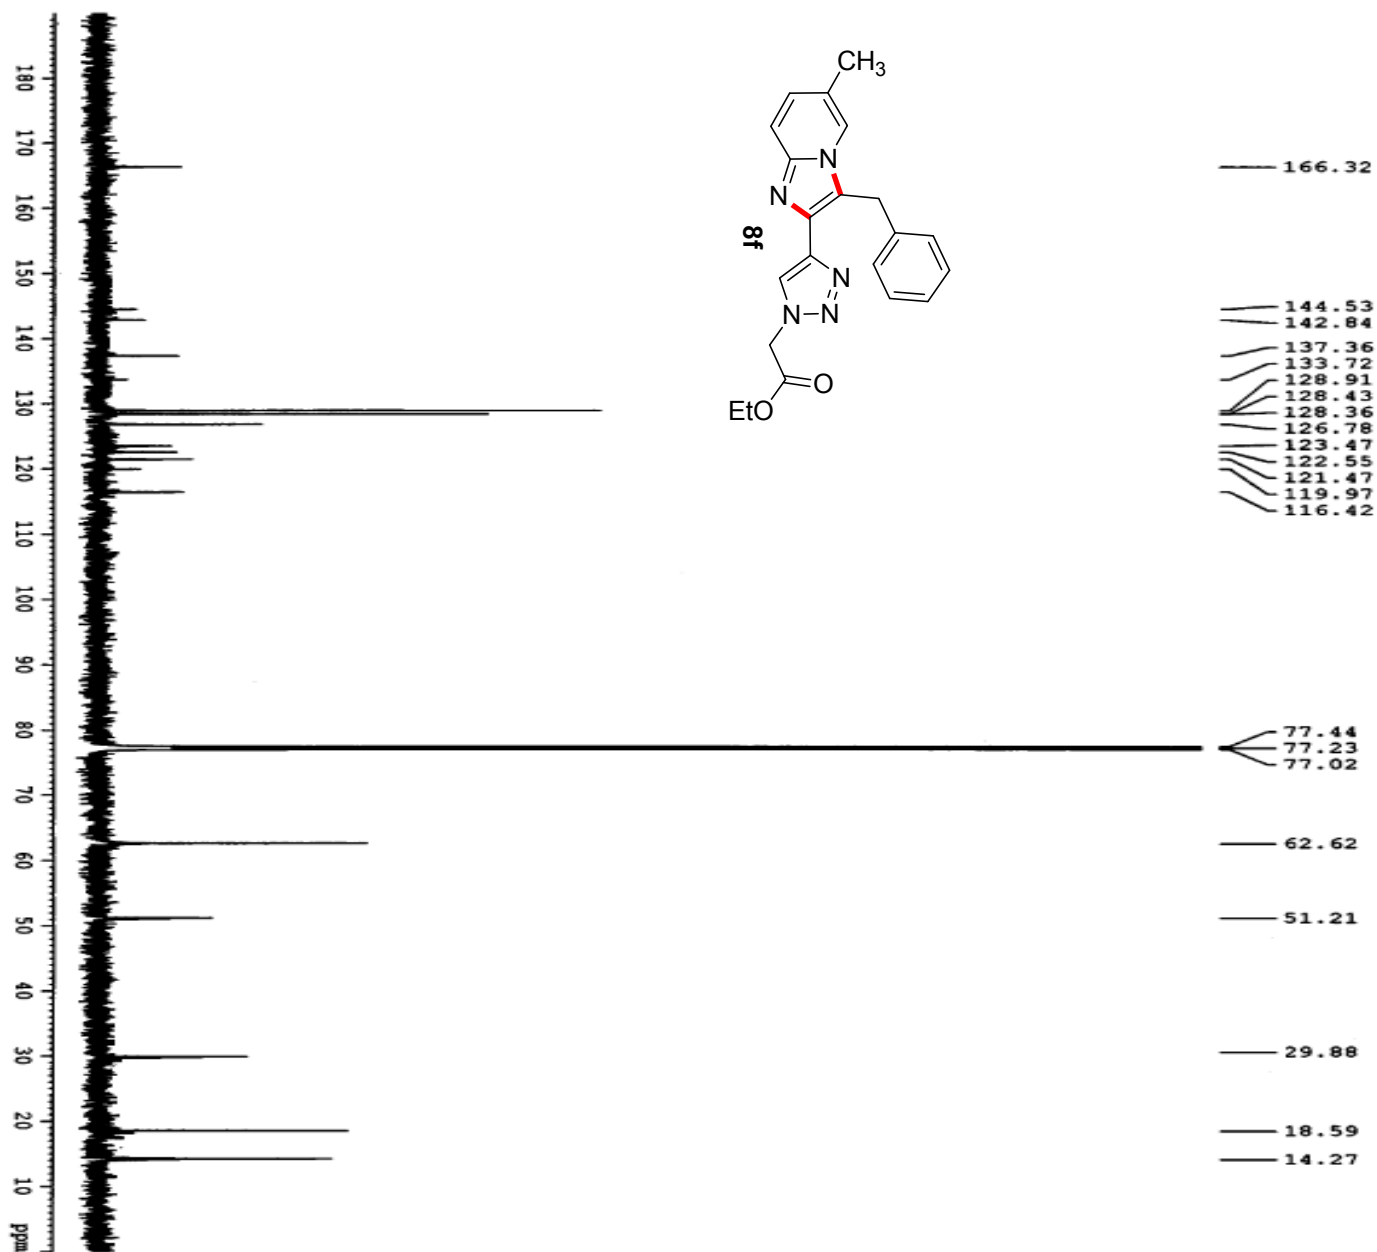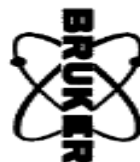

Current Data Parameters  
 NAME ALD-PE-24\_13C  
 EXNO 1  
 PROCNO 1

F2 - Acquisition Parameters  
 Date\_ 20160213  
 Time\_ 13.04  
 INSTRUM spect  
 PROBO 5 mm BBBO DM/   
 PULPROG zgpg30  
 TD 32768  
 SFO 400.146  
 SOLVENT CDCl3  
 NS 1001  
 DS 2  
 SWE 36051.691 Hz  
 FIDRES 1.100393 Hz  
 AQ 0.454829 sec  
 RG 65.24  
 DW 13.867 usec  
 DE 6.50 usec  
 TE 299.4 K  
 D1 2.0000000 sec  
 D11 0.0300000 sec  
 TDO 1

\*\*\*\*\* CHANNEL f1 \*\*\*\*\*  
 SFO1 150.9279571 MHz  
 NUC1 13C  
 P1 10.50 usec  
 PLM1 95.0000000 W

\*\*\*\*\* CHANNEL f2 \*\*\*\*\*  
 SFO2 600.1724007 MHz  
 NUC2 1H  
 CPROG12 waltz16  
 PCPD2 70.00 usec  
 PLM2 21.0000000 W  
 PLM12 0.61714000 W  
 PLM13 0.30239999 W

F2 - Processing parameters  
 SI 16384  
 SF 150.9128373 MHz  
 KW 64  
 SSB 0  
 LB 1.00 Hz  
 GB 0  
 PC 1.40

HRMS spectra of 8f

|               |                  |             |    |                 |              |                        |                       |
|---------------|------------------|-------------|----|-----------------|--------------|------------------------|-----------------------|
| Sample Name   | ALD-PPG-PR-24R   | Position    | -1 | Instrument Name | Instrument 1 | User Name              |                       |
| Inj Vol       | -10              | InjPosition |    | SampleType      | Sample       | IRM Calibration Status | Success               |
| Data Filename | ALD-PPG-PR-24R.d | Acq Method  |    | Comment         |              | Acquired Time          | 3/21/2014 11:25:17 AM |

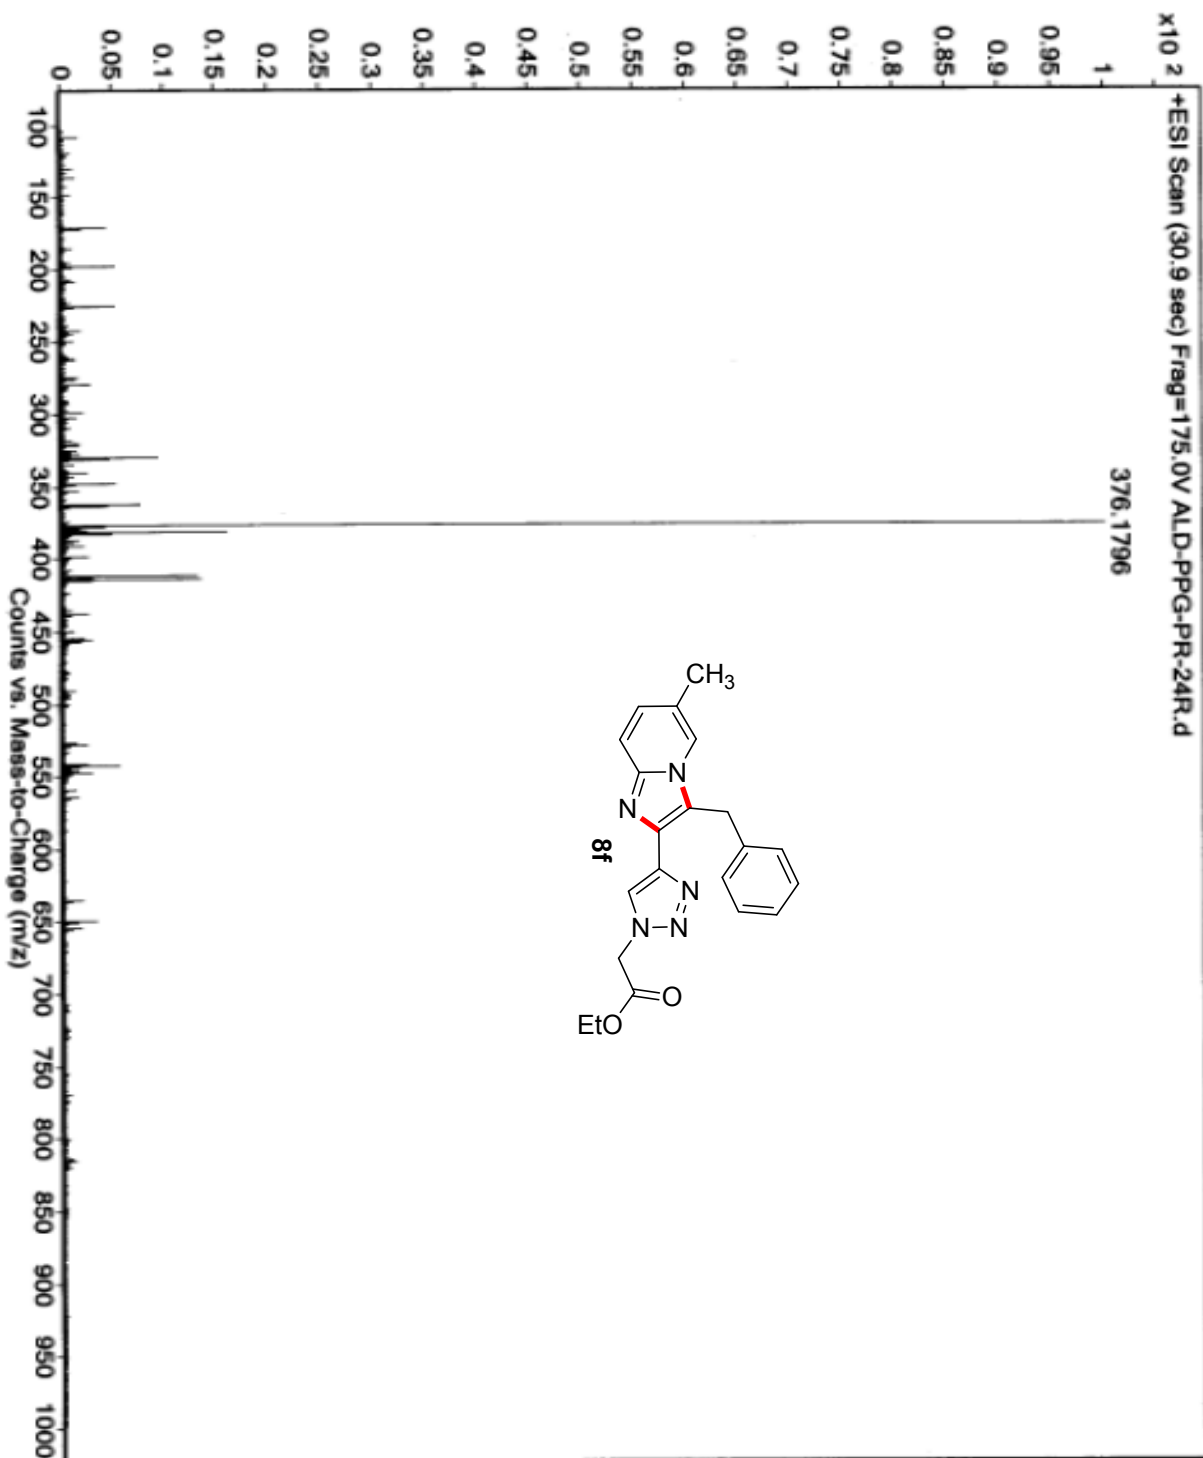

<sup>1</sup>H NMR spectra of 8g

ALD-PPQ-PR-10

Sample Name:  
ALD-PPQ-PR-10  
Data Collected on:  
11/29/2013  
Acquire directory:  
/export/home/olimpak/vmmyy/data  
Sample directory:

FIDFile: PROTON

Pulse sequence: PROTON (zgpg3)

Solvent: cdcl3

Data collected on: Dec 4 2013

Temp: 25.0 C / 298.1 K

Operator: chem

Relax. delay 1.000 sec

Pulse 45.0 degrees

Acq. time 2.561 sec

Width 6398.0 Hz

32 repetitions

OBSERVE H1, 399.9509399 MHz

DATA PROCESSED

PR size 32768

Total time 2 min 12 sec

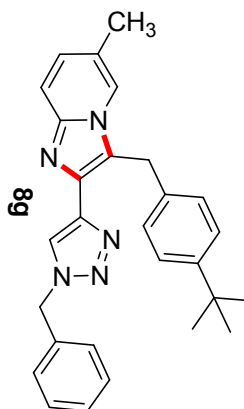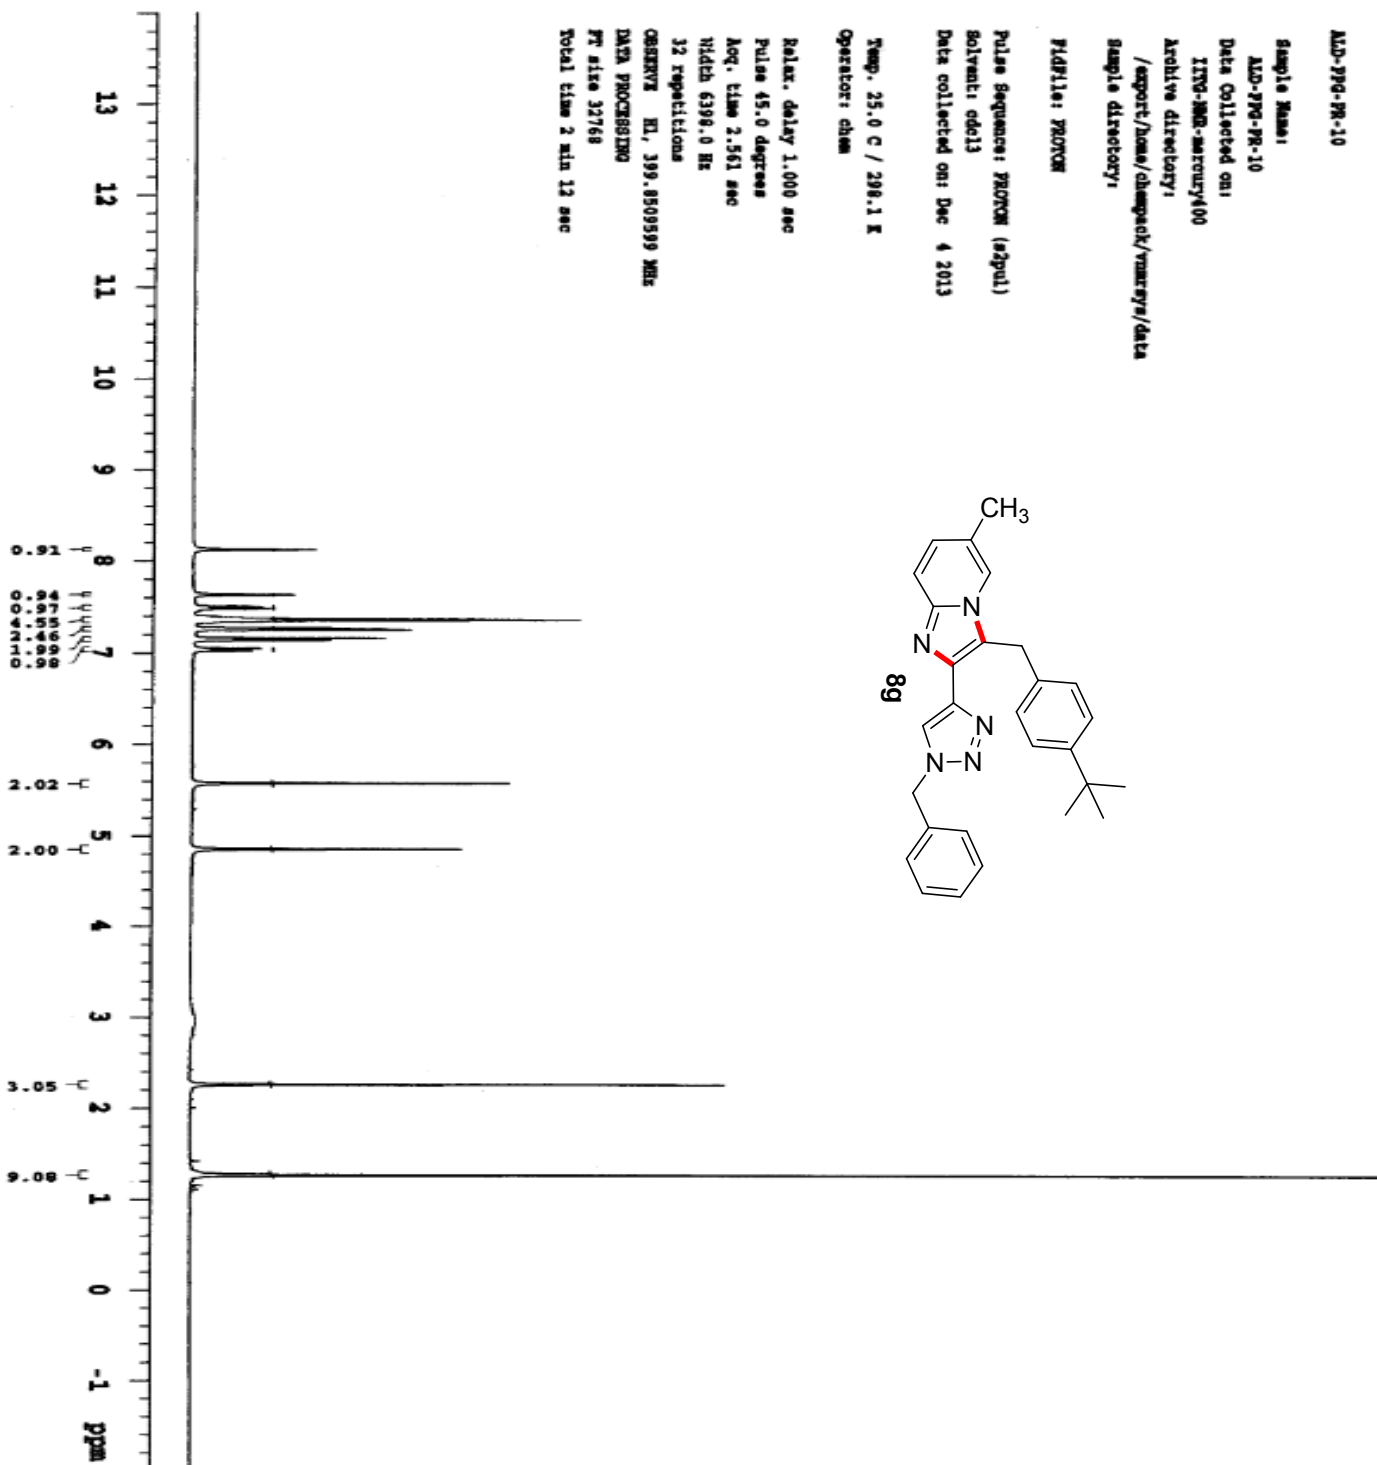

<sup>13</sup>C NMR spectra of 8g

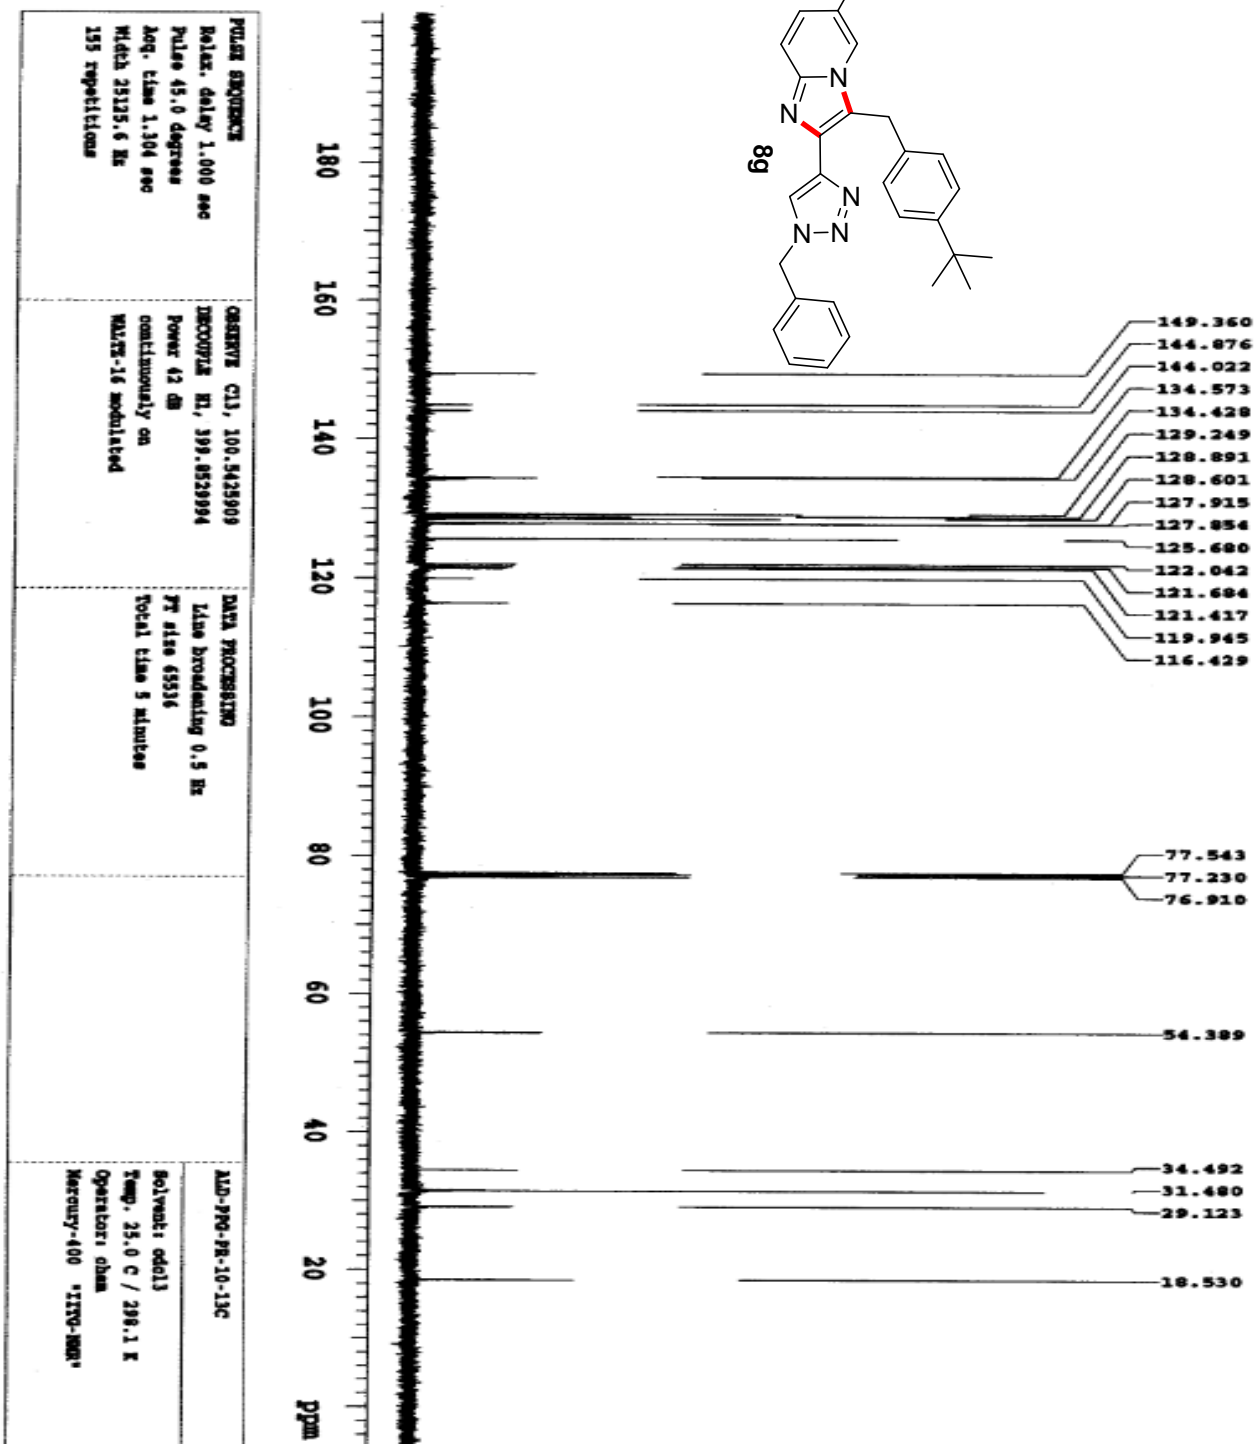

HRMS spectra of 8g

Sample Name ALD-PPG-PR-10-R Position -1  
Inj Vol -10 InjPosition  
Data Filename ALD-PPG-PR-10-R.d ACQ Method  
Instrument Name Instrument 1  
SampleType Sample  
Comment  
User Name  
IM Calibration Status  
Acquired Time 3/18/2014 2:31:44 PM  
Success

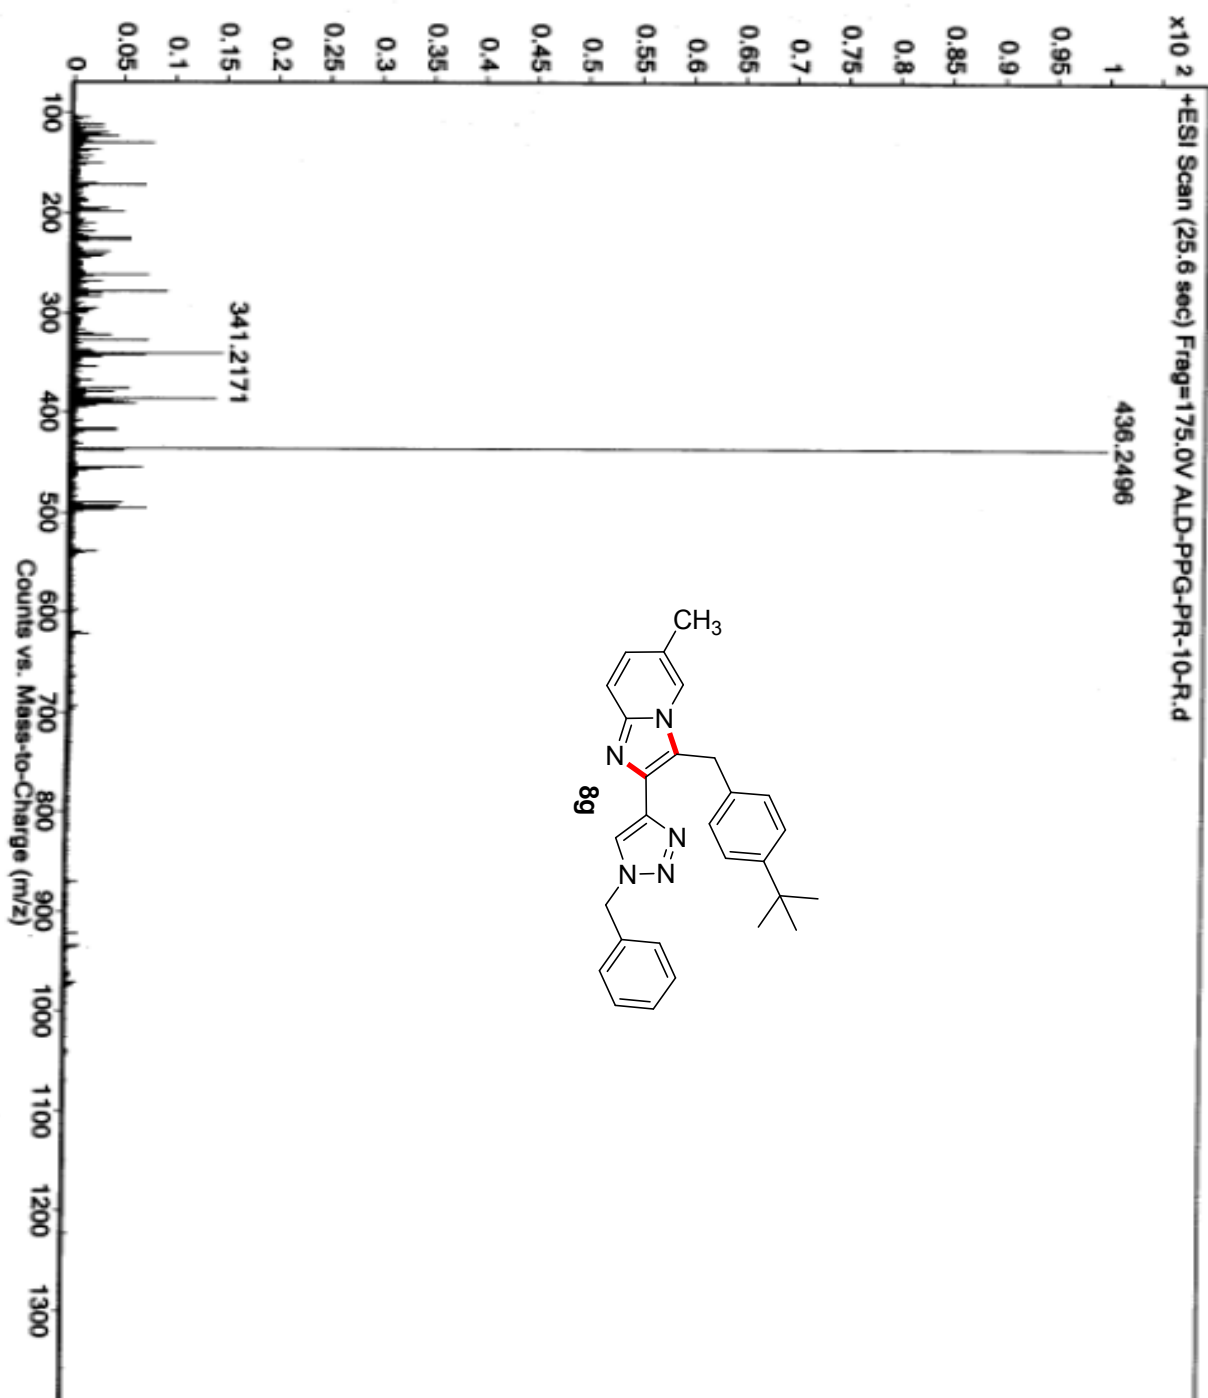

<sup>1</sup>H NMR spectra of 8h

Sample Name:  
ALD\_P04\_P0\_15  
Data Collected on:  
1190-NMR-mercury400  
Archive directory:  
Sample directory:  
FIDFile: PROTON  
Pulse Sequence: PROTON (zgpg3)  
Solvent: cdcl3  
Data collected on: Jan 25 2014

Temp: 25.0 C / 298.1 K  
Operator: chm

Relax. delay: 1.000 sec  
Pulse 45.0 degrees  
Acq. time 2.561 sec  
Width 6398.0 Hz  
32 repetitions  
OBSERVE H1, 399.8509634 MHz  
DATA PROCESSING  
FT size 32768  
Total time 2 min 12 sec

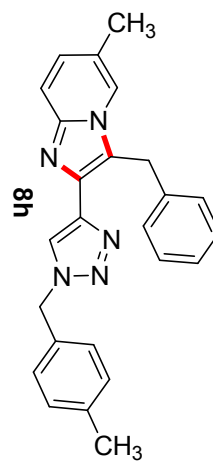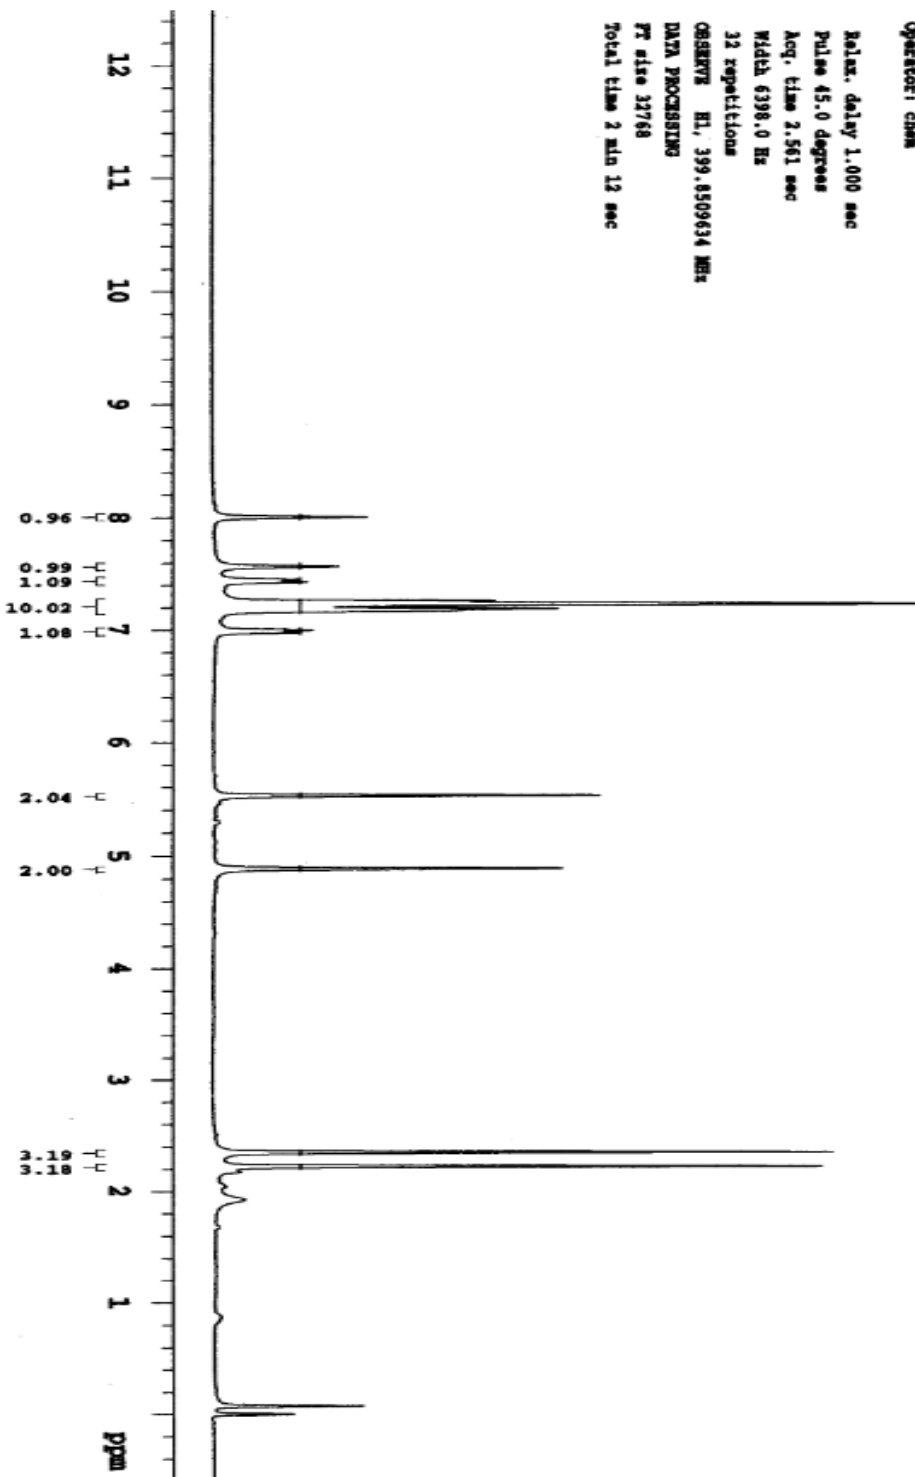



<sup>13</sup>C NMR spectra of **8h**

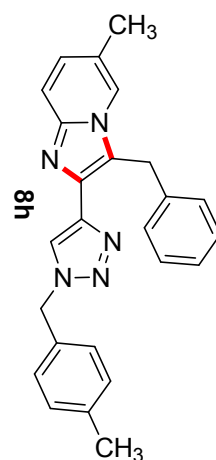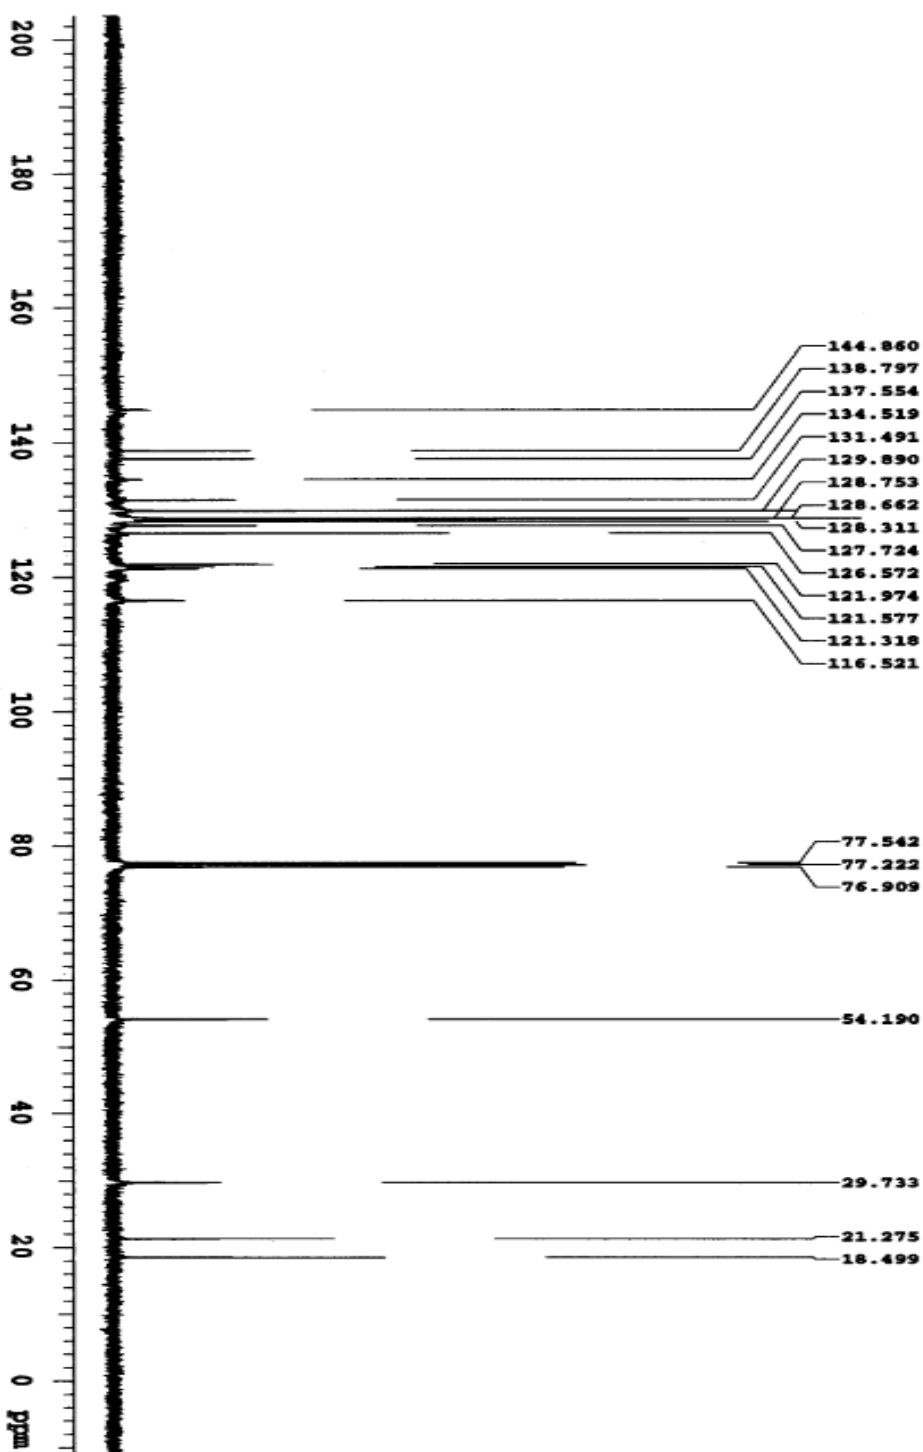

|                                                                                                                                                                |                                                                                                                                           |                                                                                                               |                                                                                                                               |
|----------------------------------------------------------------------------------------------------------------------------------------------------------------|-------------------------------------------------------------------------------------------------------------------------------------------|---------------------------------------------------------------------------------------------------------------|-------------------------------------------------------------------------------------------------------------------------------|
| <p><b>PULSE SEQUENCE</b></p> <p>Relax. delay 1.000 sec</p> <p>Pulse 45.0 degree</p> <p>Acq. time 1.304 sec</p> <p>Width 25125.6 Hz</p> <p>1180 repetitions</p> | <p><b>OBSERVE</b> C13, 100.5425932</p> <p>INSTRUM BL, 399.8529994</p> <p>Power 42 dB</p> <p>continuously on</p> <p>WALTZ-16 modulated</p> | <p><b>DATA PROCESSING</b></p> <p>line broadening 0.5 Hz</p> <p>FT also 65536</p> <p>Total time 45 minutes</p> | <p>ALD-PRD-28-15-13C</p> <p>Solvent: cdcl3</p> <p>Temp. 25.0 C / 298.1 K</p> <p>Operator: clem</p> <p>Mercury-400 13C-NMR</p> |
|----------------------------------------------------------------------------------------------------------------------------------------------------------------|-------------------------------------------------------------------------------------------------------------------------------------------|---------------------------------------------------------------------------------------------------------------|-------------------------------------------------------------------------------------------------------------------------------|

HRMS spectra of 8h

|               |                 |             |    |                 |              |                        |                      |
|---------------|-----------------|-------------|----|-----------------|--------------|------------------------|----------------------|
| Sample Name   | ALD-PPG-PR-15   | Position    | -1 | Instrument Name | Instrument 1 | User Name              |                      |
| Inj Vol       | -10             | InjPosition |    | SampleType      | Sample       | IRM Calibration Status | Success              |
| Data Filename | ALD-PPG-PR-15.d | Acq Method  |    | Comment         |              | Acquired Time          | 3/11/2014 3:52:19 PM |

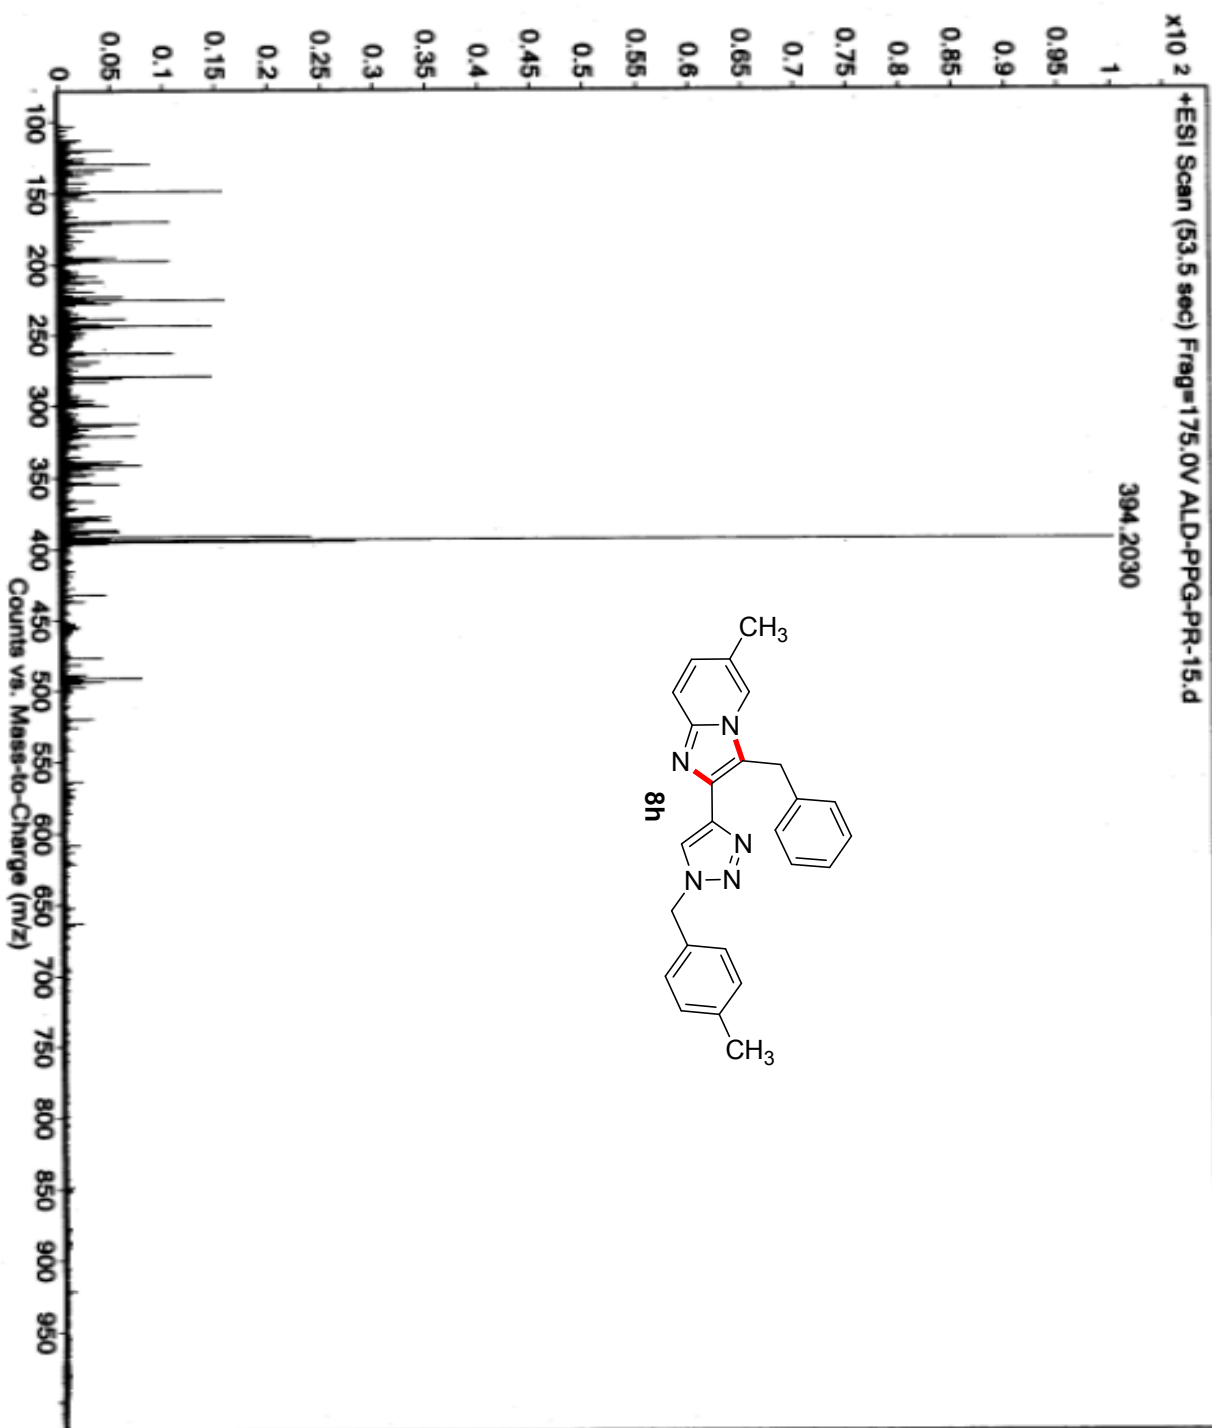



<sup>13</sup>C NMR spectra of **8i**

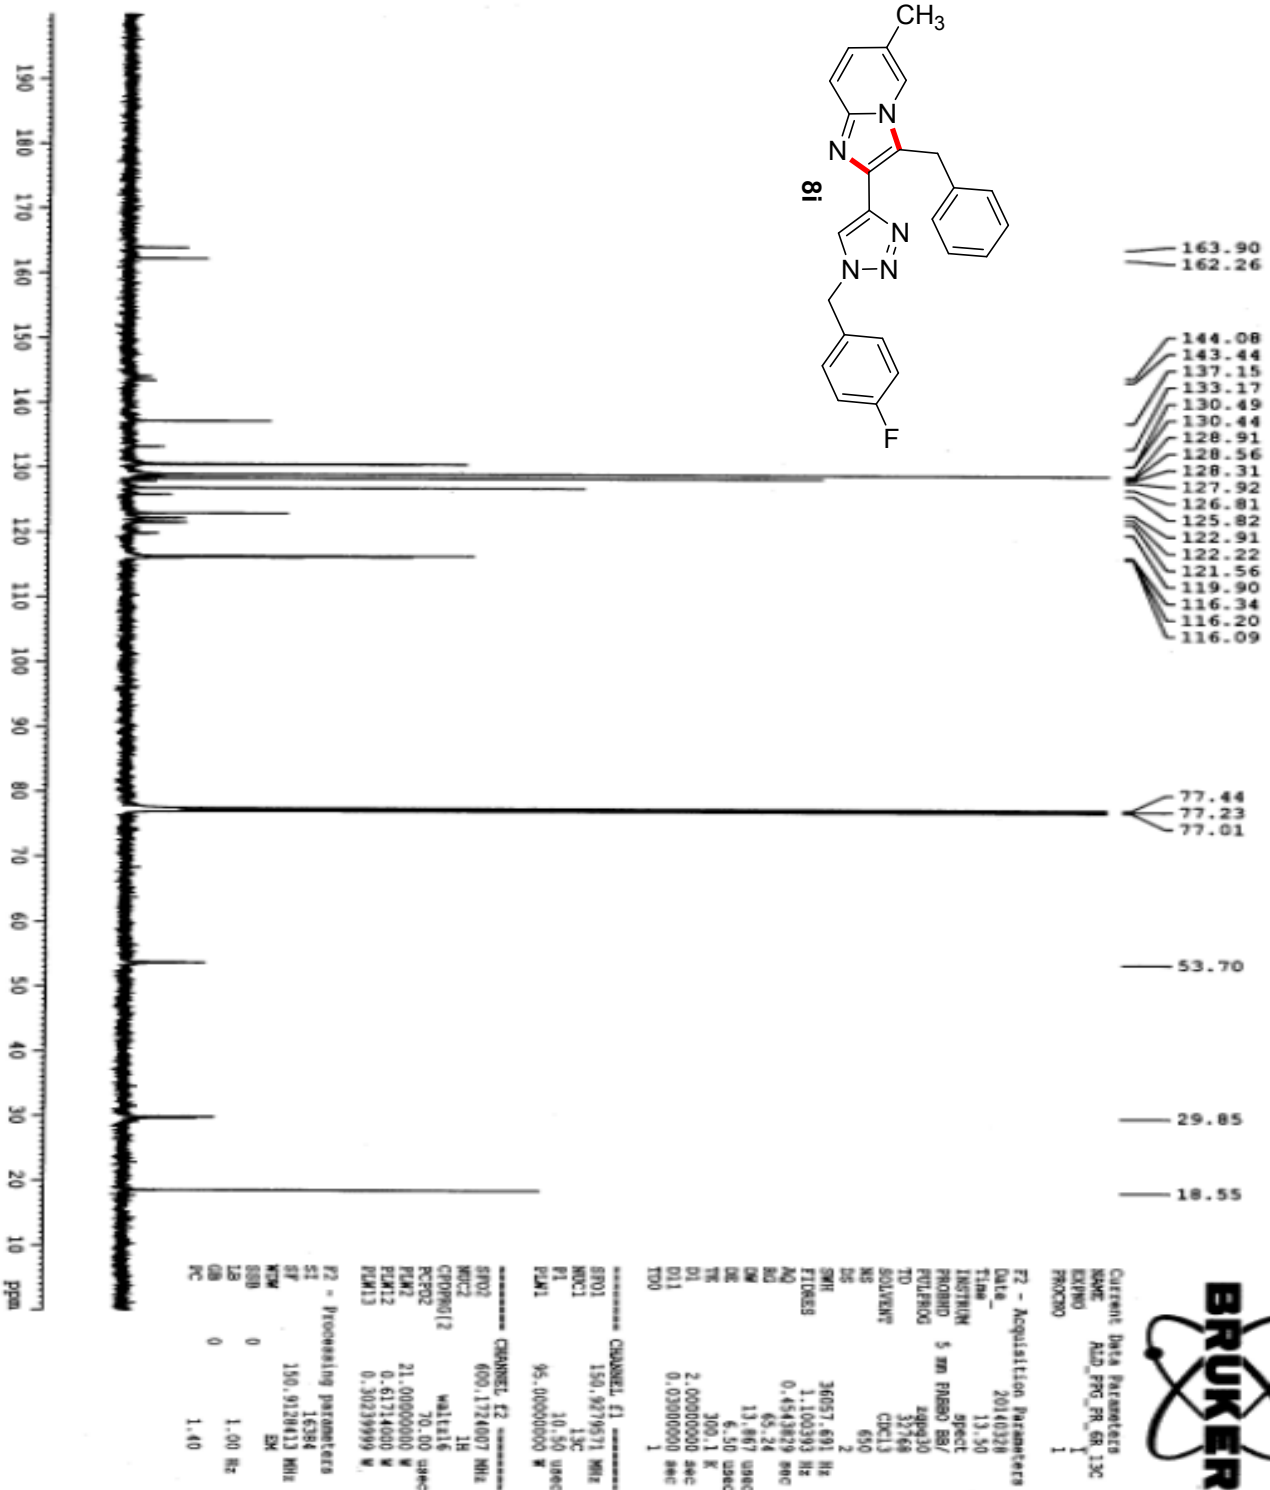

HRMS spectra of 8i

|               |                  |             |    |                 |              |                        |                      |
|---------------|------------------|-------------|----|-----------------|--------------|------------------------|----------------------|
| Sample Name   | ALD-PPG-PR-6-R   | Position    | -1 | Instrument Name | Instrument 1 | User Name              | Success              |
| Inj Vol       | -10              | InjPosition |    | SampleType      | Sample       | IRM Calibration Status |                      |
| Data Filename | ALD-PPG-PR-6-R.d | Acq Method  |    | Comment         |              | Acquired Time          | 3/18/2014 2:38:46 PM |

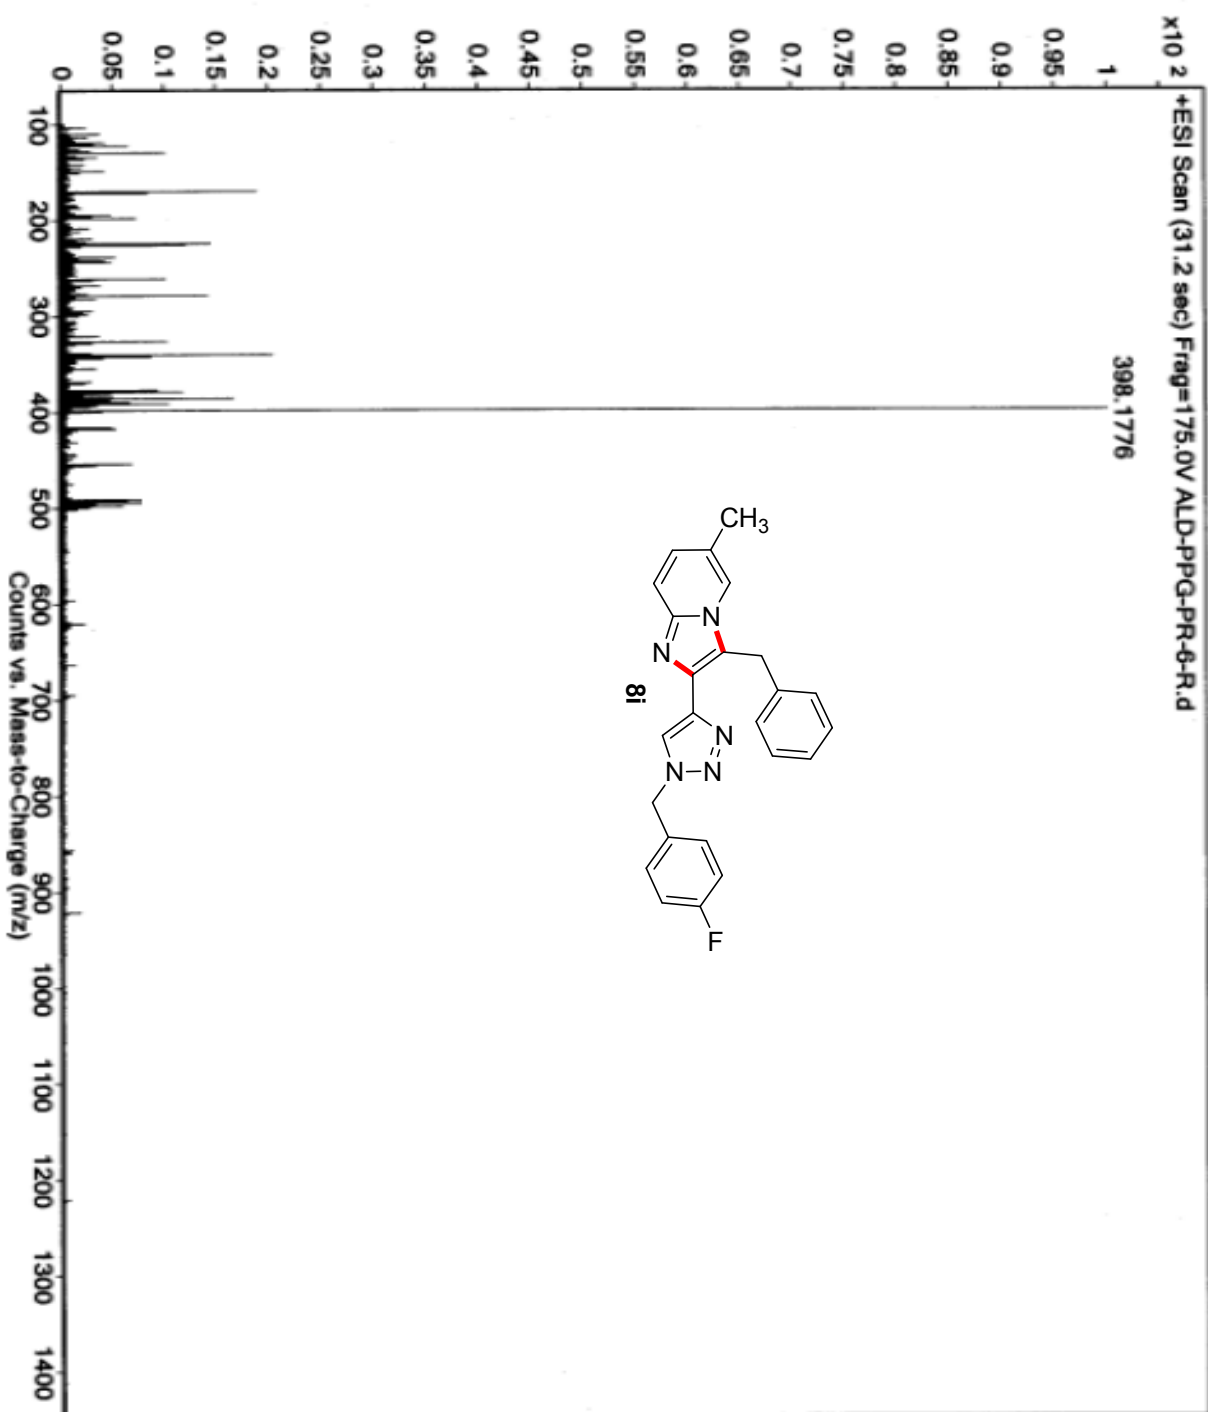

<sup>1</sup>H NMR spectra of 8j

ALD-PPQ-PR-9  
Sample Name:  
ALD-PPQ-PR-9  
Data Collected on:  
11/20/2013  
Acquire directory:  
Sample directory:  
FID/FLI: PROTON  
Pulse Sequence: PROTON (zgpg30)  
Solvent: cdcl3  
Data collected on: Nov 20 2013

Temp: 25.0 C / 298.1 K  
Operator: chm  
Relax. delay: 1.000 sec  
Pulse: 45.0 degrees  
Acq. time: 2.561 sec  
Width: 6398.0 Hz  
32 repetitions  
OBSERVED: 401, 399, 850605 MHz  
DATA PROCESSING  
PI: 45.000000  
Total time: 2 min 12 sec

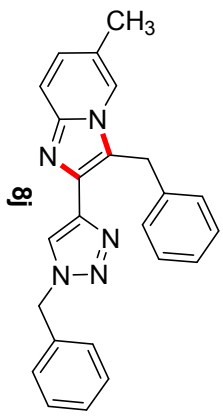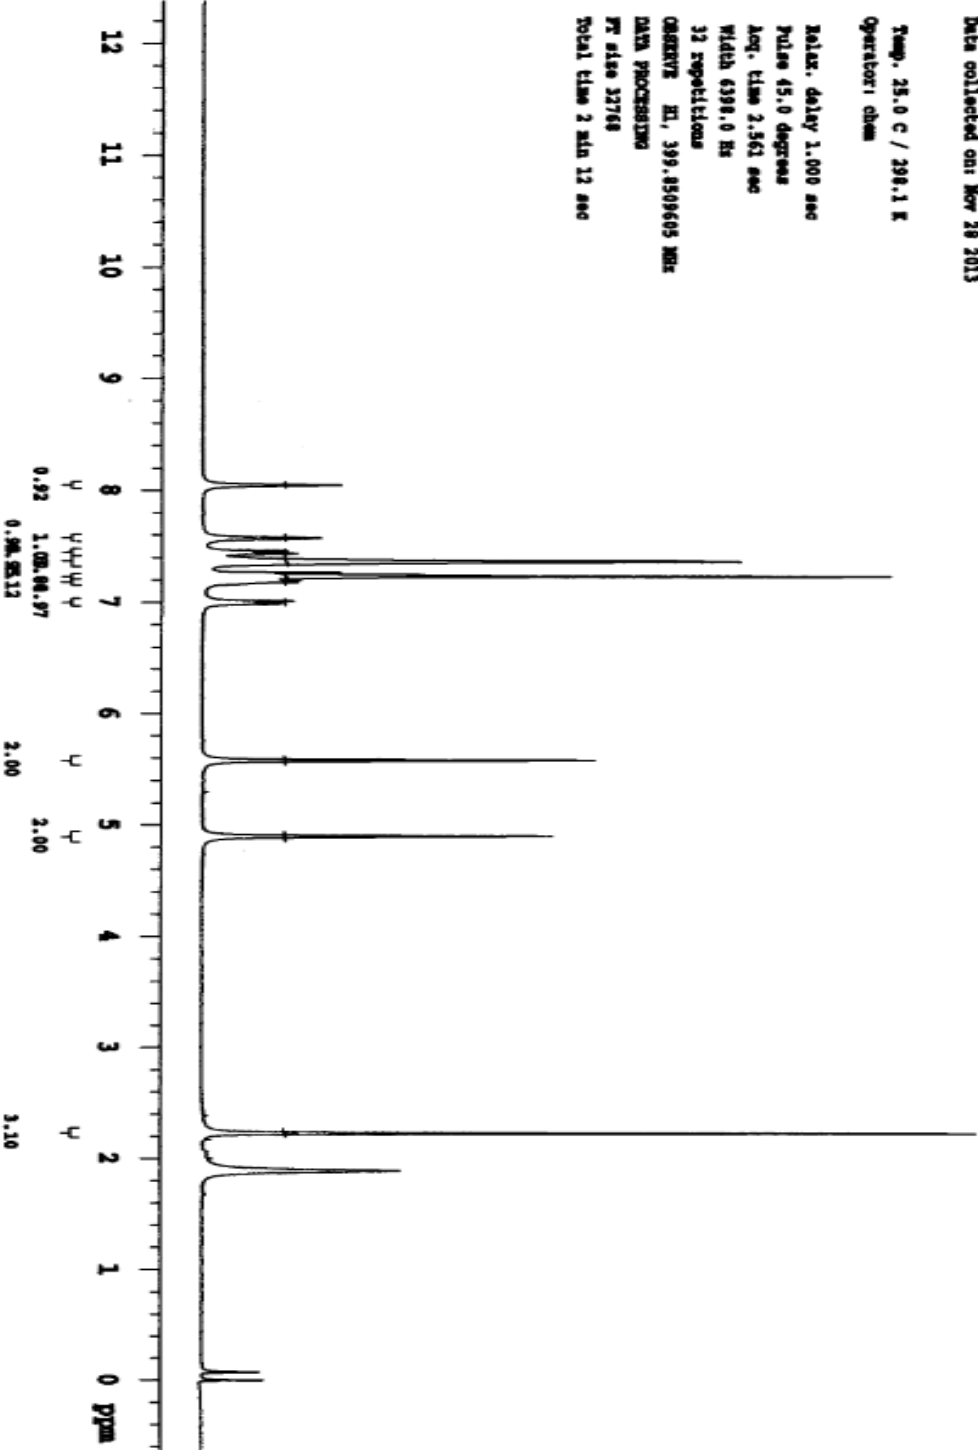

<sup>13</sup>C NMR spectra of **8j**

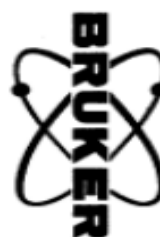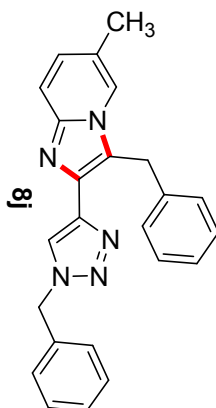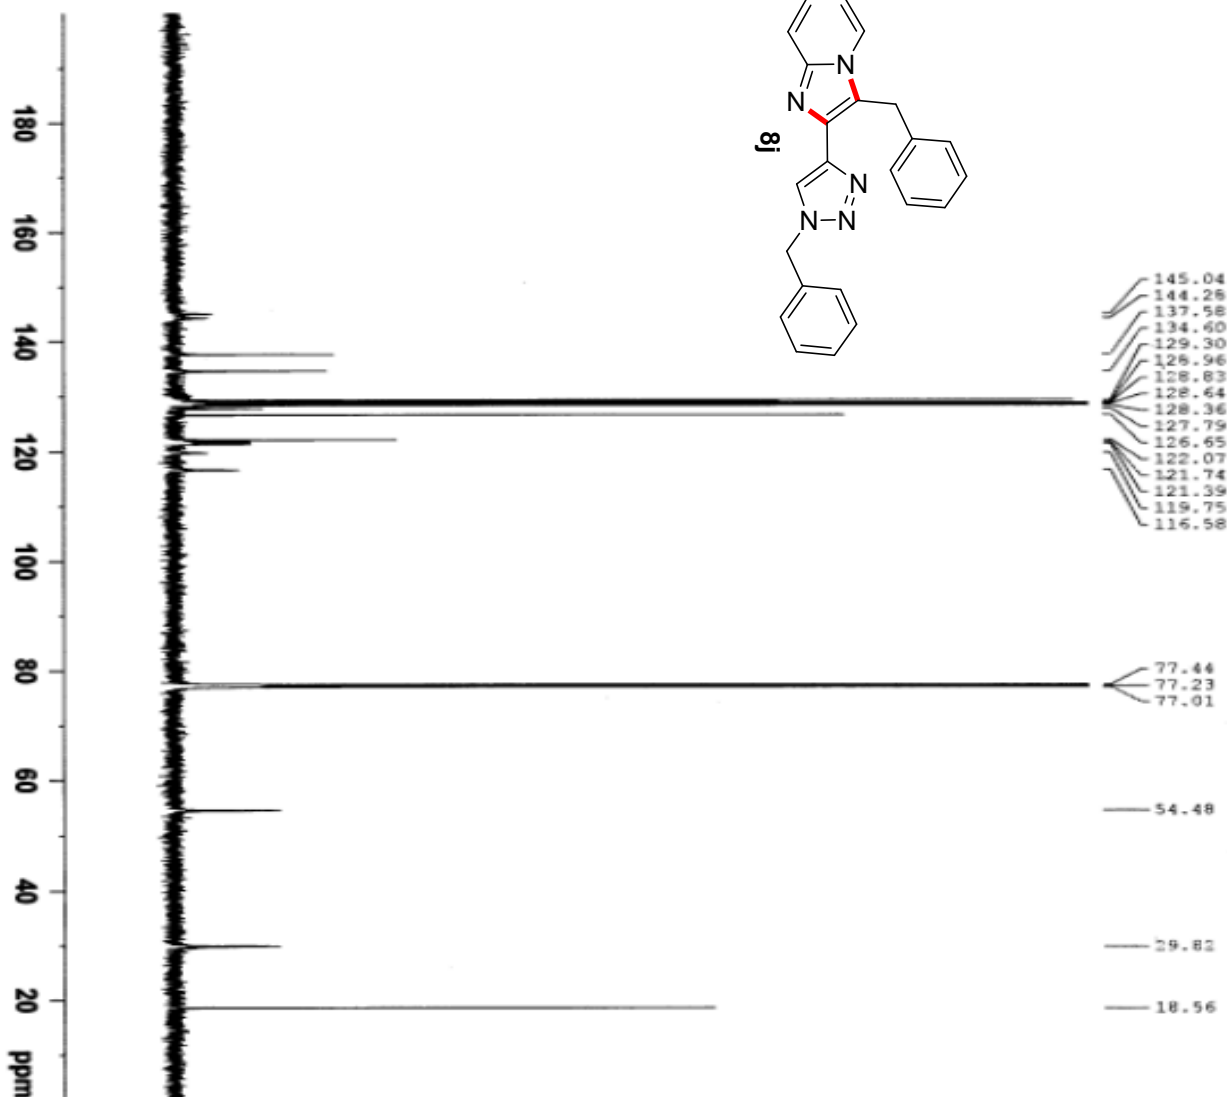

Current Data Parameters  
 NAME ALD-PRG-PR-9-2-13C  
 EXPNO 1  
 PROCNO 1

F2 - Acquisition Parameters  
 Date\_ 20131129  
 Time\_ 10.38  
 INSTRUM spect  
 PROBD 5 mm PABBO BB/  
 PULPROG zgpg30  
 TD 32768  
 SOLVENT CDCl3  
 NS 1024  
 DS 2  
 SWH 36057.691 Hz  
 FIDRES 1.100393 Hz  
 AQ 0.4543829 sec  
 RG 65.24  
 DM 13.067 usec  
 DE 6.50 usec  
 TE 298.7 K  
 D1 2.00000000 sec  
 D11 0.03000000 sec  
 TDO 1

===== CHANNEL f1 =====  
 SFO1 150.9279571 MHz  
 NUC1 13C  
 P1 10.50 usec  
 PLM1 95.00000000 W

===== CHANNEL f2 =====  
 SFO2 600.1724007 MHz  
 NUC2 1H  
 CPOPRG12 WALTZ16  
 RCPD2 70.00 usec  
 PLM2 21.00000000 W  
 PLM12 0.61714000 W  
 PLM13 0.30239999 W

F2 - Processing parameters  
 SI 16384  
 SF 150.9128413 MHz  
 WDW EM  
 SSB 0  
 LB 1.00 Hz  
 GB 0  
 PC 1.40

HRMS spectra of 8j

|               |                 |             |    |                 |              |                        |                      |
|---------------|-----------------|-------------|----|-----------------|--------------|------------------------|----------------------|
| Sample Name   | ALB-PPG-PR-9R   | Position    | -1 | Instrument Name | Instrument 1 | User Name              |                      |
| Inj Vol       | -10             | InjPosition |    | SampleType      | Sample       | IRM Calibration Status | Success              |
| Data Filename | ALB-PPG-PR-9R.d | Acq Method  |    | Comment         |              | Acquired Time          | 3/20/2014 9:47:11 AM |

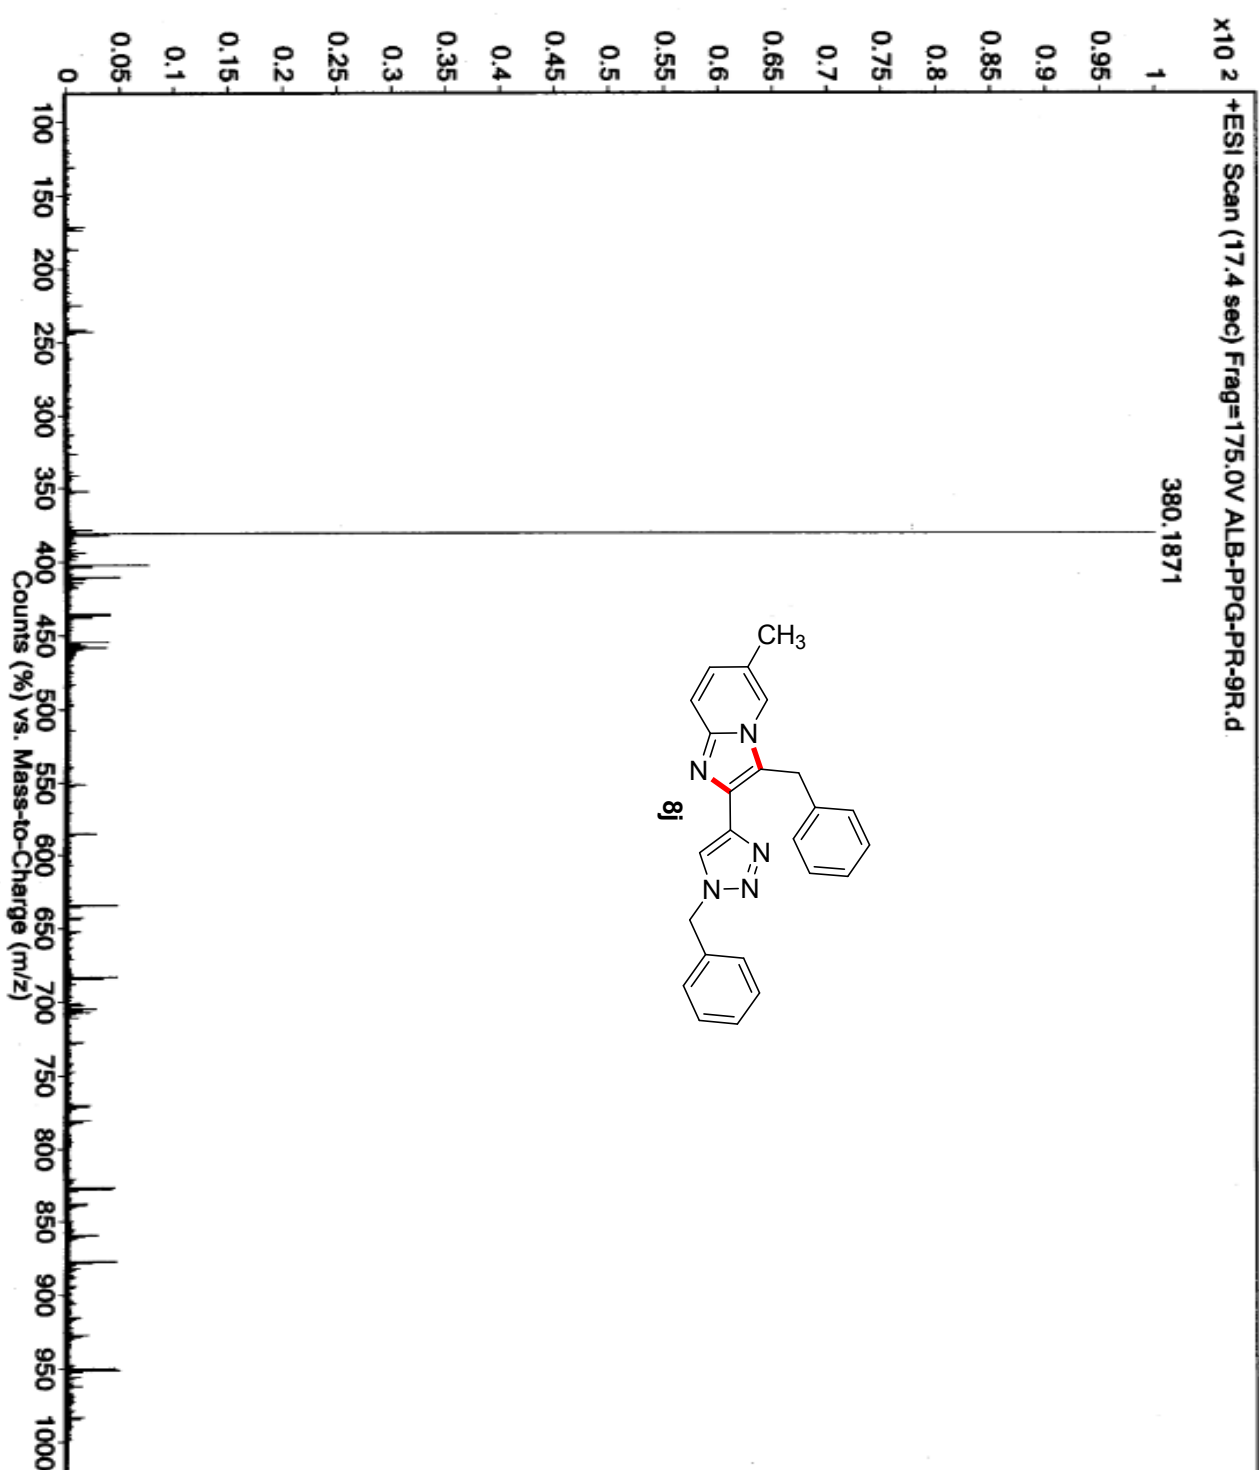



<sup>1</sup>H NMR spectra of 8k

Sample Name:  
ALD-PPQ-PR-16  
Data Collected on:  
ITW-NMR-marcury400  
Archive directory:  
/home/chem/data/study  
Sample directory:  
test-proton-01  
P1/Title: ALD-PPQ-PR-16

Pulse Sequence: PROTON (zgpg3)  
Solvent: cdcl3  
Data collected on: Jan 28 2014

Temp. 25.0 C / 298.1 K  
Operator: chem

Relax. delay 1.000 sec  
Pulse 45.0 degrees  
Acq. time 2.561 sec  
Width 6398.0 Hz  
12 repetitions  
OBSERVE H1, 399.8509636 MHz  
DATA PROCESSING  
F1 also 32768  
Total time 2 min 12 sec

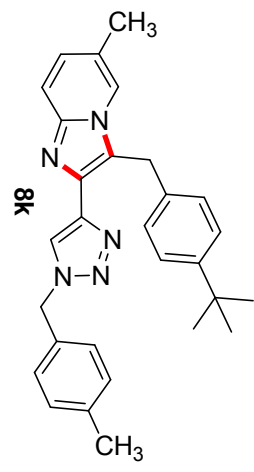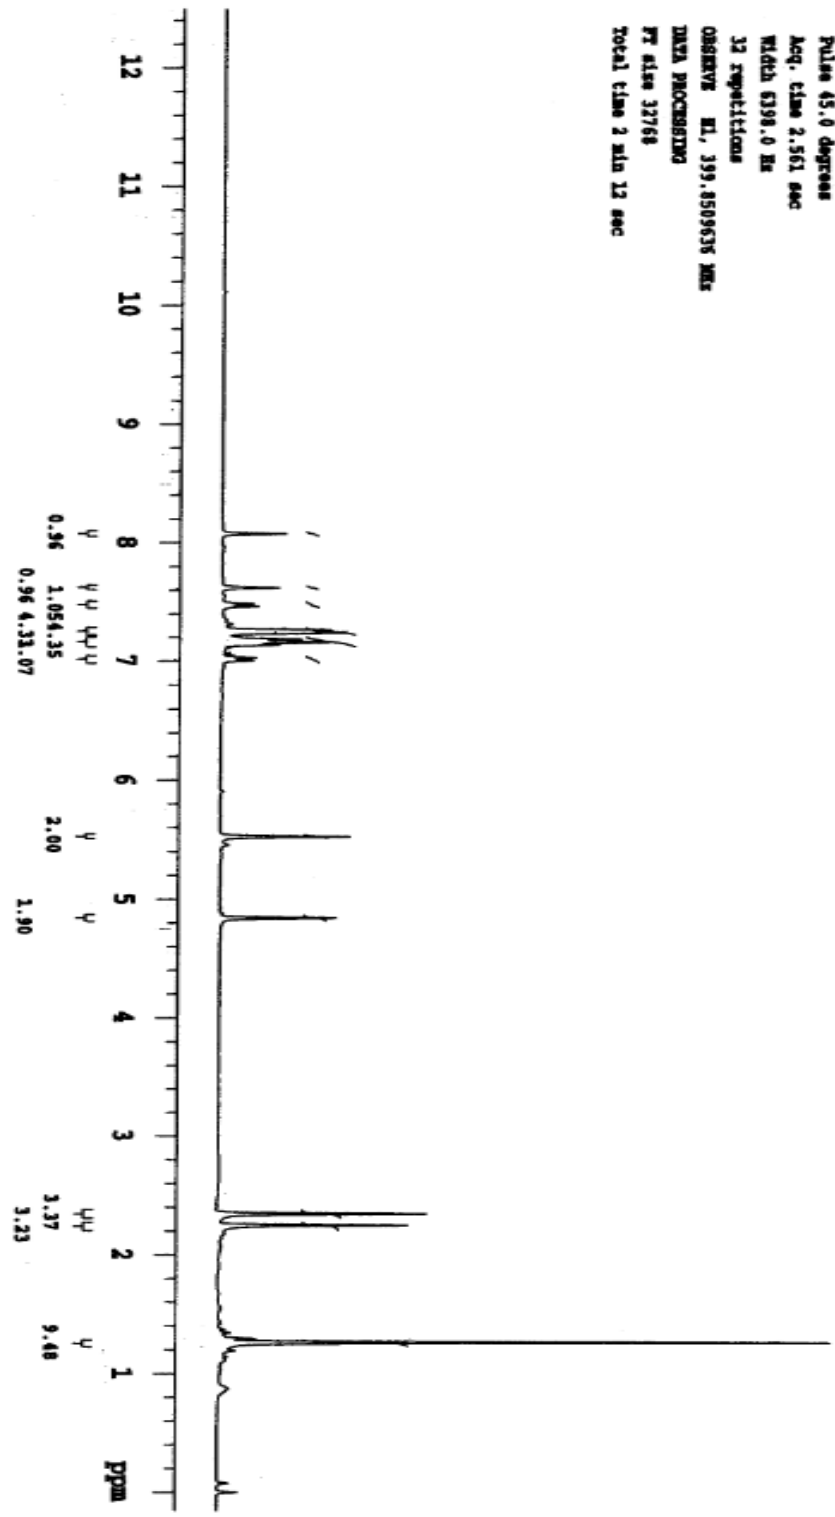

<sup>13</sup>C NMR spectra of **8k**

|                                                                                                                                                                   |                                                                                                                                                |                                                                                                               |                                                                                                                                        |
|-------------------------------------------------------------------------------------------------------------------------------------------------------------------|------------------------------------------------------------------------------------------------------------------------------------------------|---------------------------------------------------------------------------------------------------------------|----------------------------------------------------------------------------------------------------------------------------------------|
| <p><b>PROB EXPERIMENT</b></p> <p>Pulse: delay 1.000 sec</p> <p>Pulse: 45.0 degrees</p> <p>Acq. time 1.304 sec</p> <p>Width 25125.6 Hz</p> <p>1400 repetitions</p> | <p><b>OSCILLATE</b> C13, 400.5425878</p> <p>RECORDING HI, 299.8529994</p> <p>Power: 42 dB</p> <p>continuously on</p> <p>NAIIR-16 modulated</p> | <p><b>DATA PROCESSING</b></p> <p>Line broadening 0.5 Hz</p> <p>FT size 65536</p> <p>Total time 15 minutes</p> | <p><b>ALD_PP0_PP_16_03C</b></p> <p>Solvent: cdcl3</p> <p>Temp. 25.0 C / 298.1 K</p> <p>Operator: cbm</p> <p>Mercury-400 "1170-MHz"</p> |
|-------------------------------------------------------------------------------------------------------------------------------------------------------------------|------------------------------------------------------------------------------------------------------------------------------------------------|---------------------------------------------------------------------------------------------------------------|----------------------------------------------------------------------------------------------------------------------------------------|

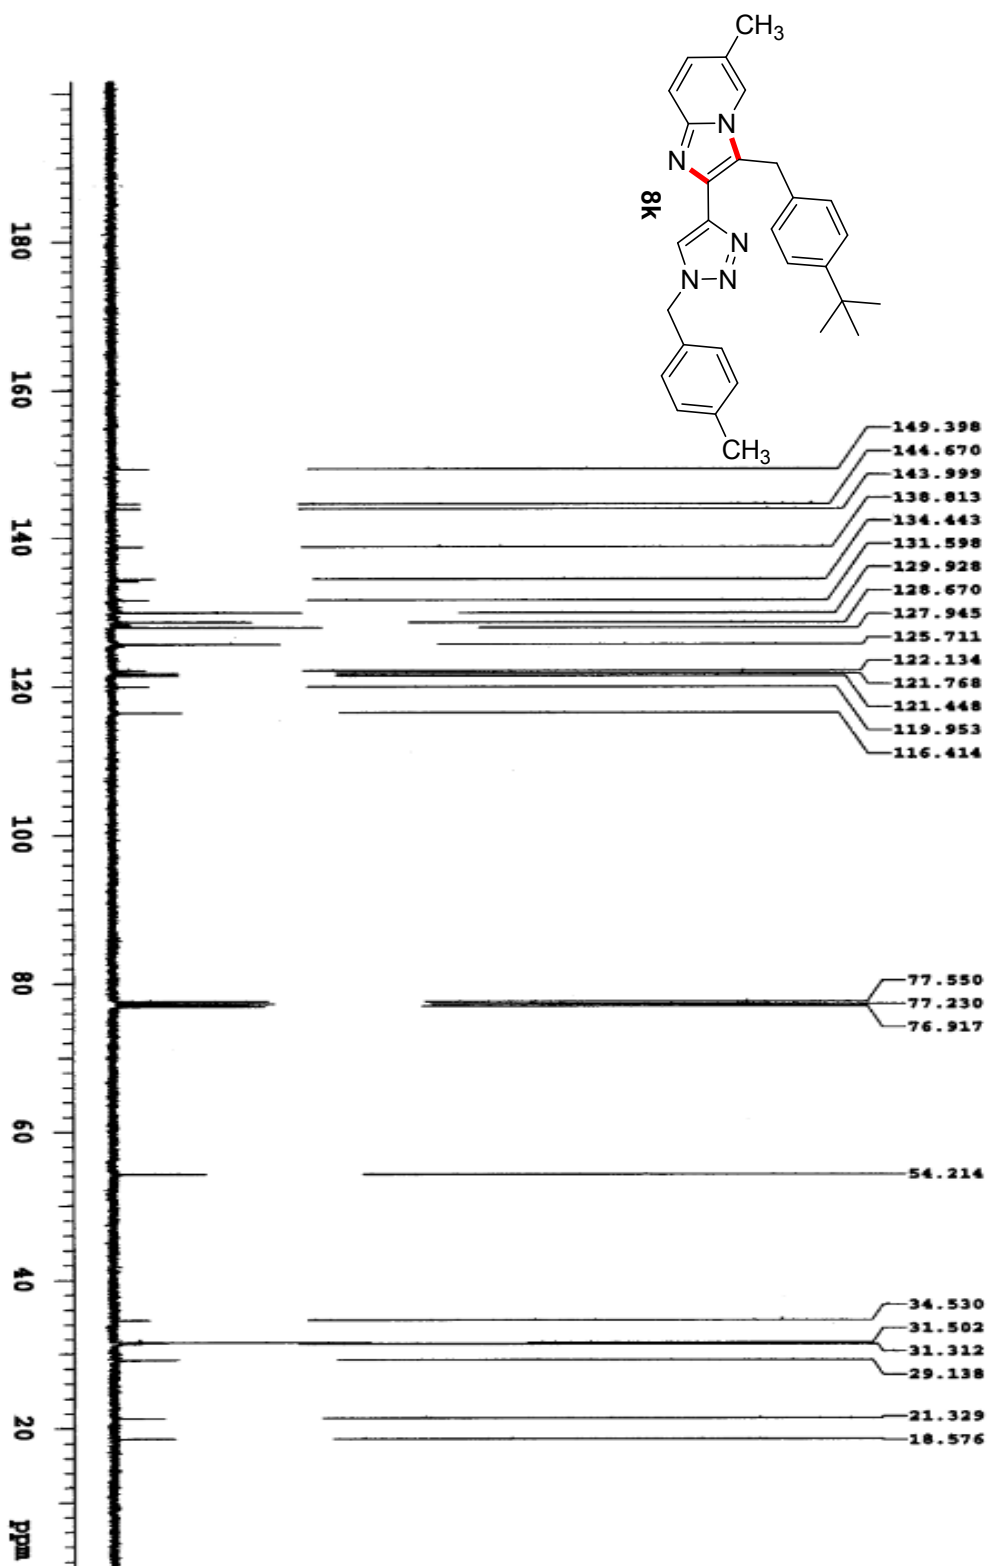

HRMS spectra of 8k

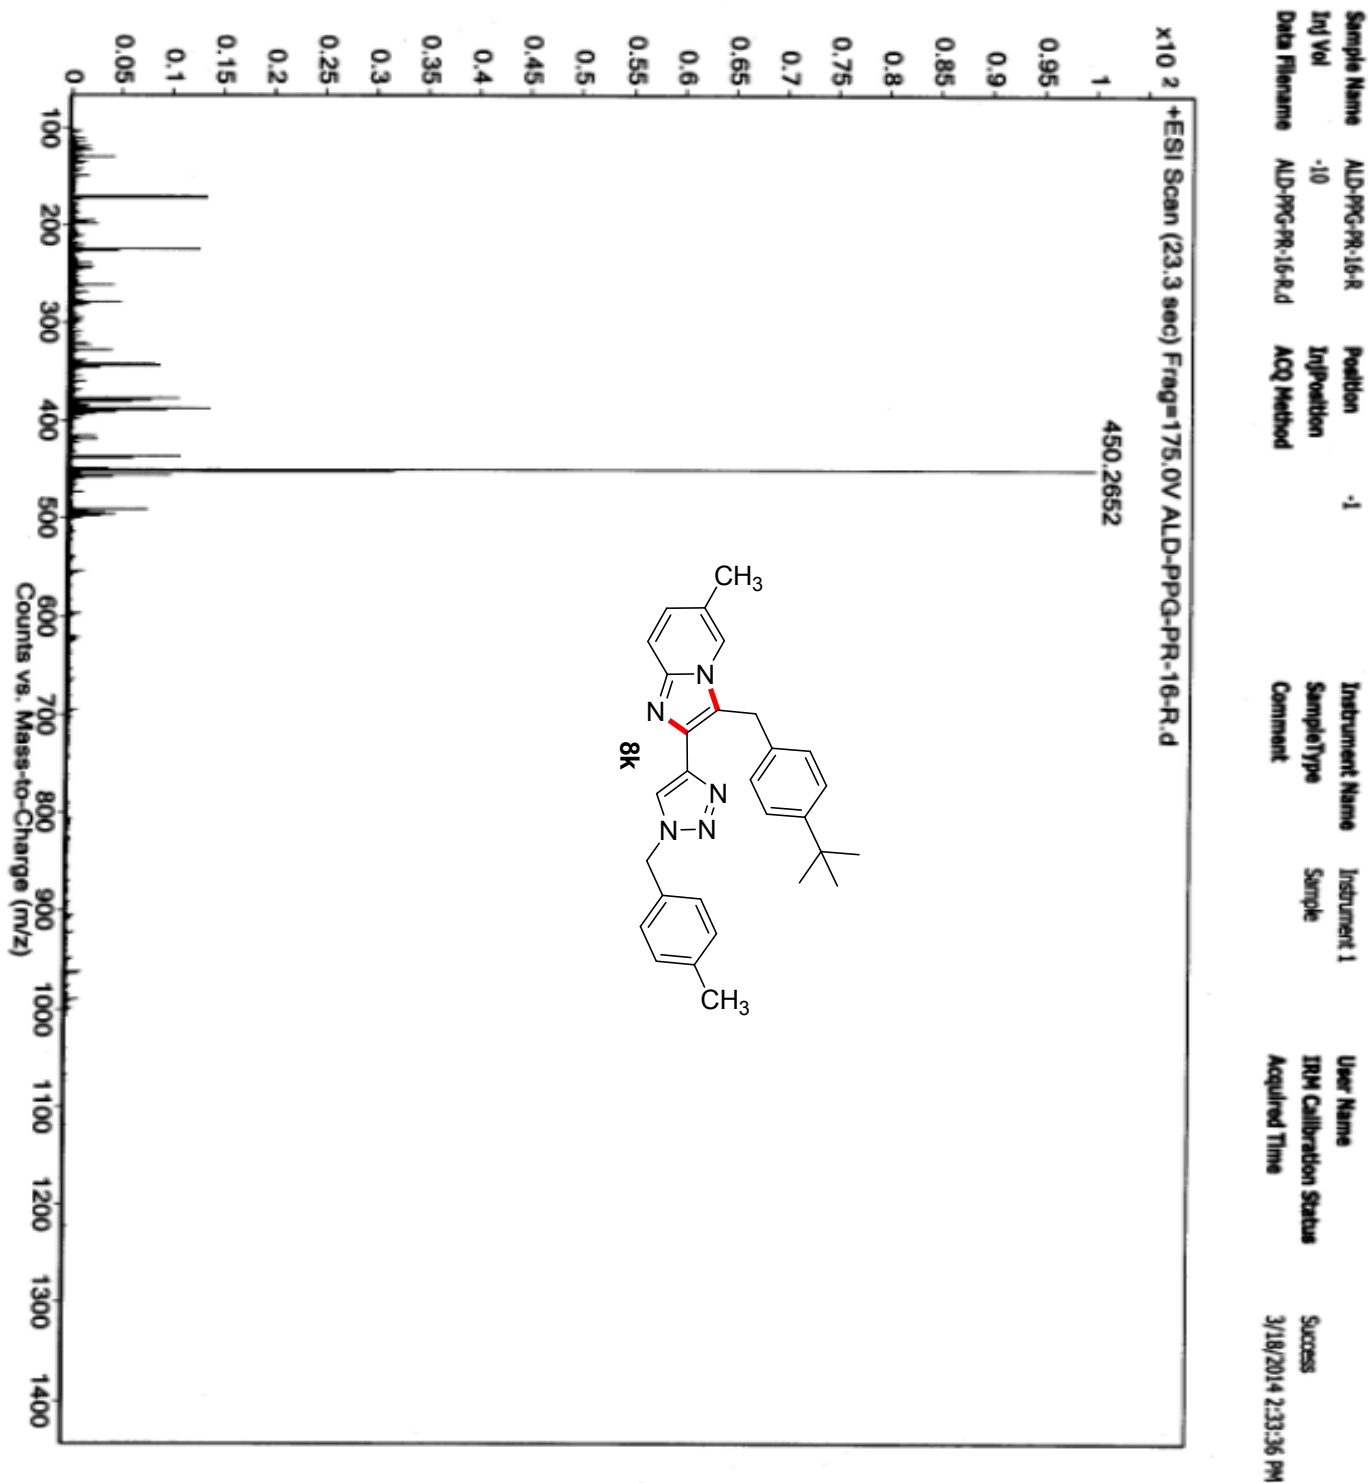

<sup>1</sup>H NMR spectra of 81

Sample Name: ALD-PTD-PT-13  
Data Collected on: ITRV-NMR-Mercury400  
Archive directory:  
Sample directory:  
P14P11:1: PROTON

Pulse Sequence: PROTON (zgpg3)  
Solvent: cdcl3  
Data collected on: Dec 10 2013

Temp. 25.0 C / 298.1 K  
Operator: dbm

Relax. delay 1.000 sec  
Pulse 45.0 degrees  
Acq. time 2.561 sec  
Width 6398.0 Hz

32 repetitions  
OBSERVE HI, 399.850890 MHz  
DATA PROCESSING  
PT also 32768  
Total time 2 min 12 sec

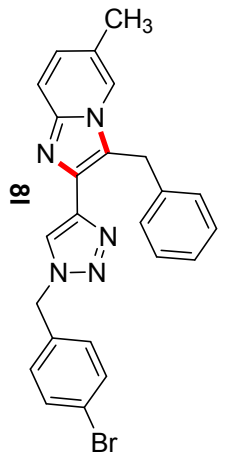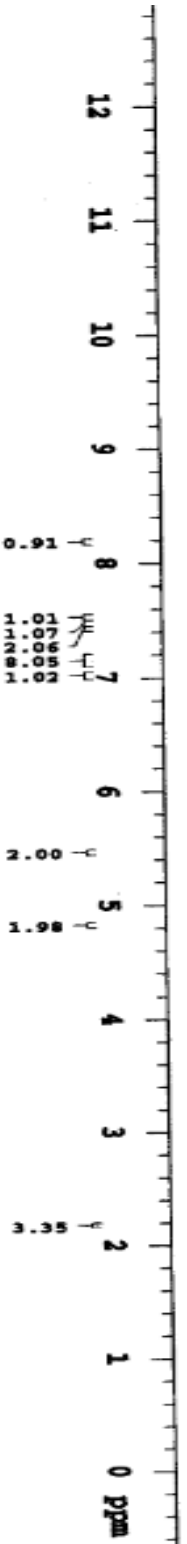

<sup>13</sup>C NMR spectra of 81

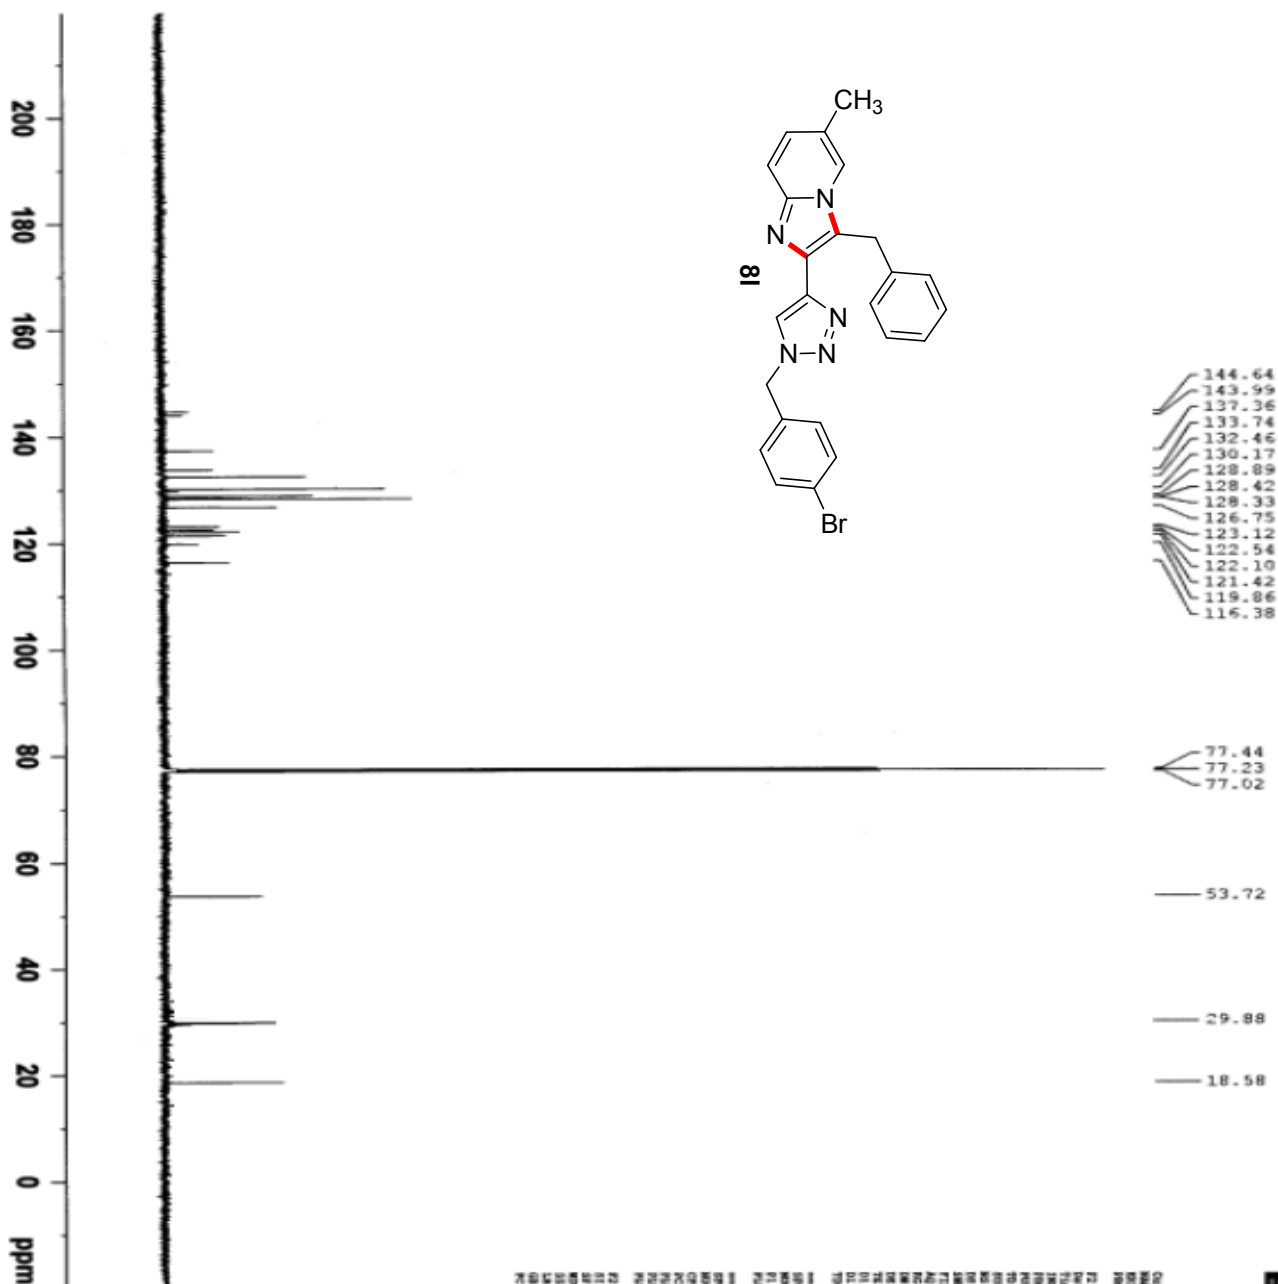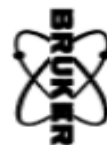

Current Data Parameters  
 Name: 211212  
 Date\_Time: 11/16/16  
 Instrument: spect  
 PROBHD: 5 mm BBO-1H/1  
 PULPROG: zgpg30  
 TD: 65536  
 SFO: 500.136199  
 AQ: 1.000000  
 F2 - Acquisition Parameters  
 Name: 211212  
 Date\_Time: 11/16/16  
 Instrument: spect  
 PROBHD: 5 mm BBO-1H/1  
 PULPROG: zgpg30  
 TD: 65536  
 SFO: 500.136199  
 AQ: 1.000000  
 F2 - Processing parameters  
 SI: 32768  
 SF: 125.013282 MHz  
 DS: 4  
 SSF: 31.253205 MHz  
 SSB: 0  
 LB: 1.00 Hz  
 GB: 0  
 PC: 1.48

HRMS spectra of 81

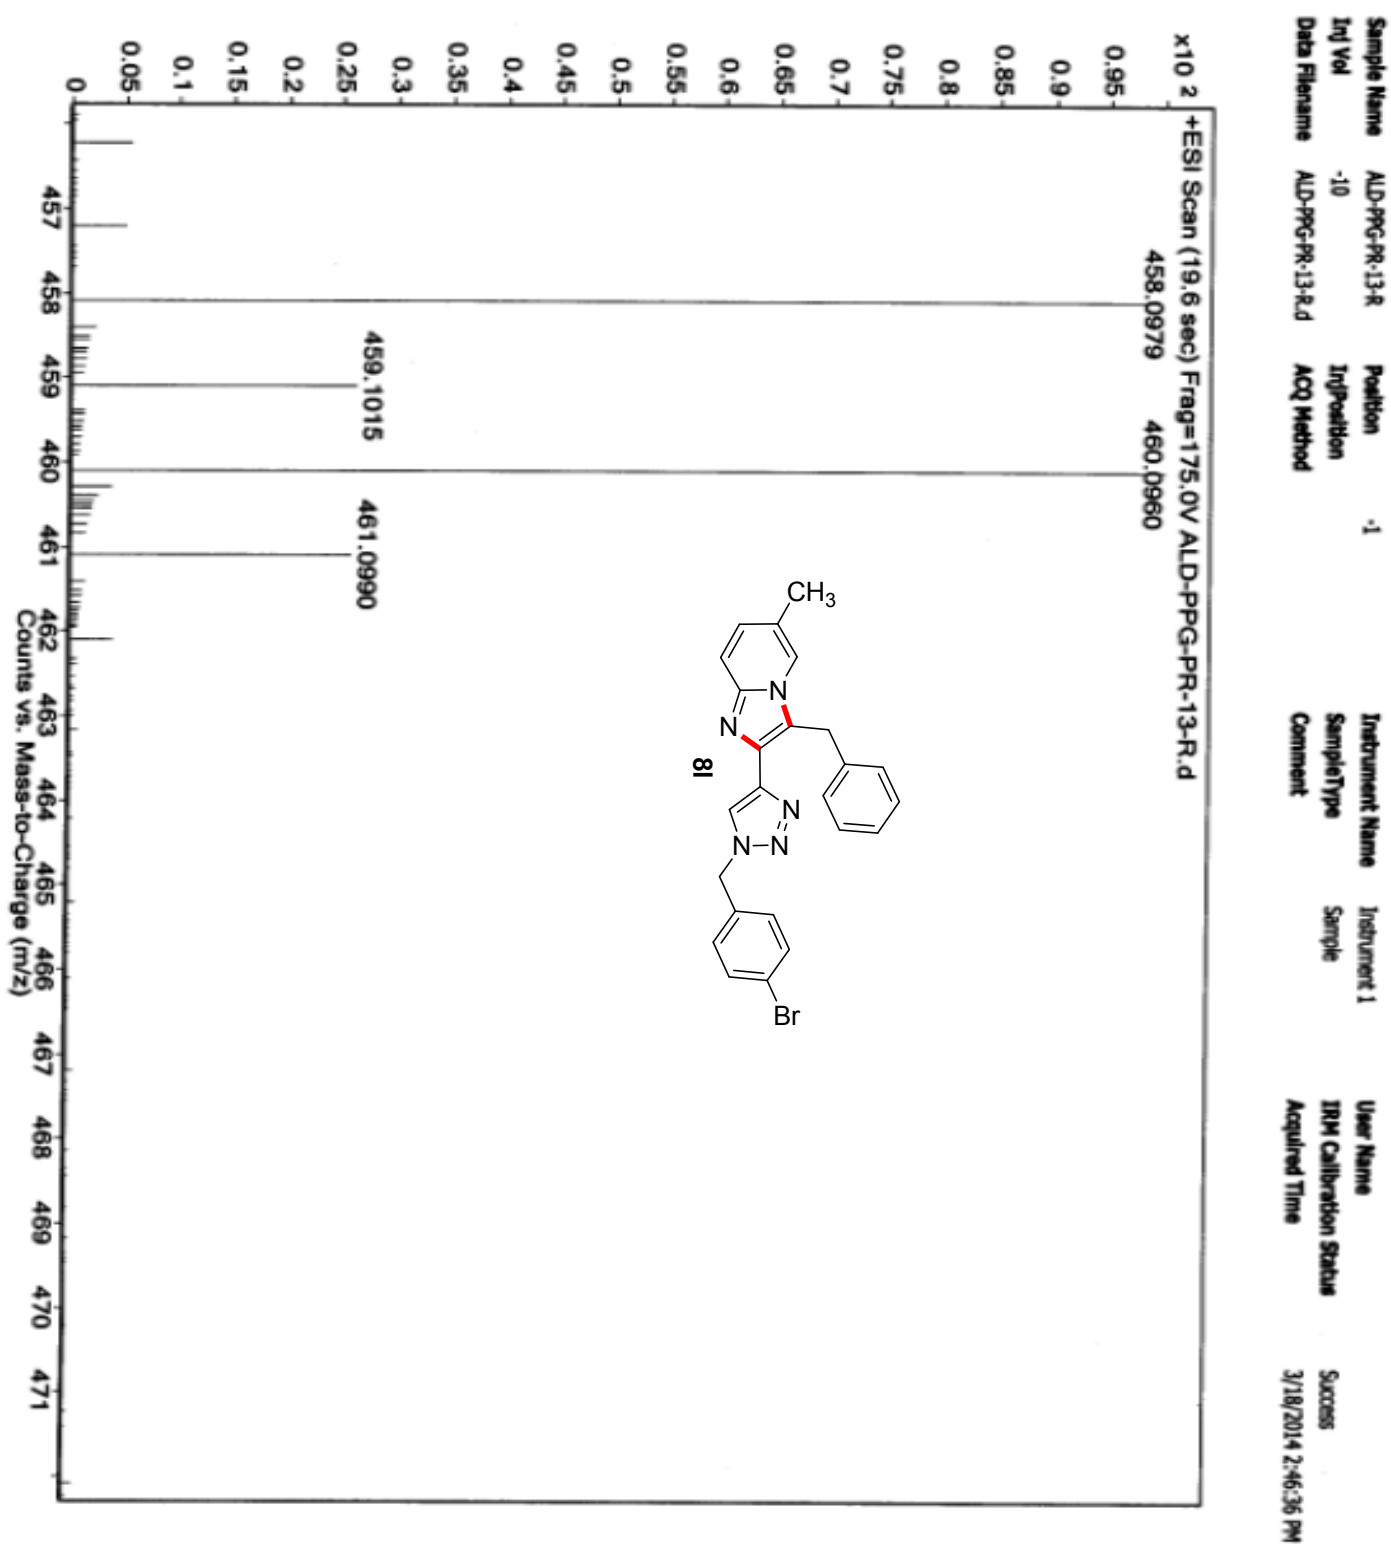

<sup>1</sup>H NMR spectra of **8m**

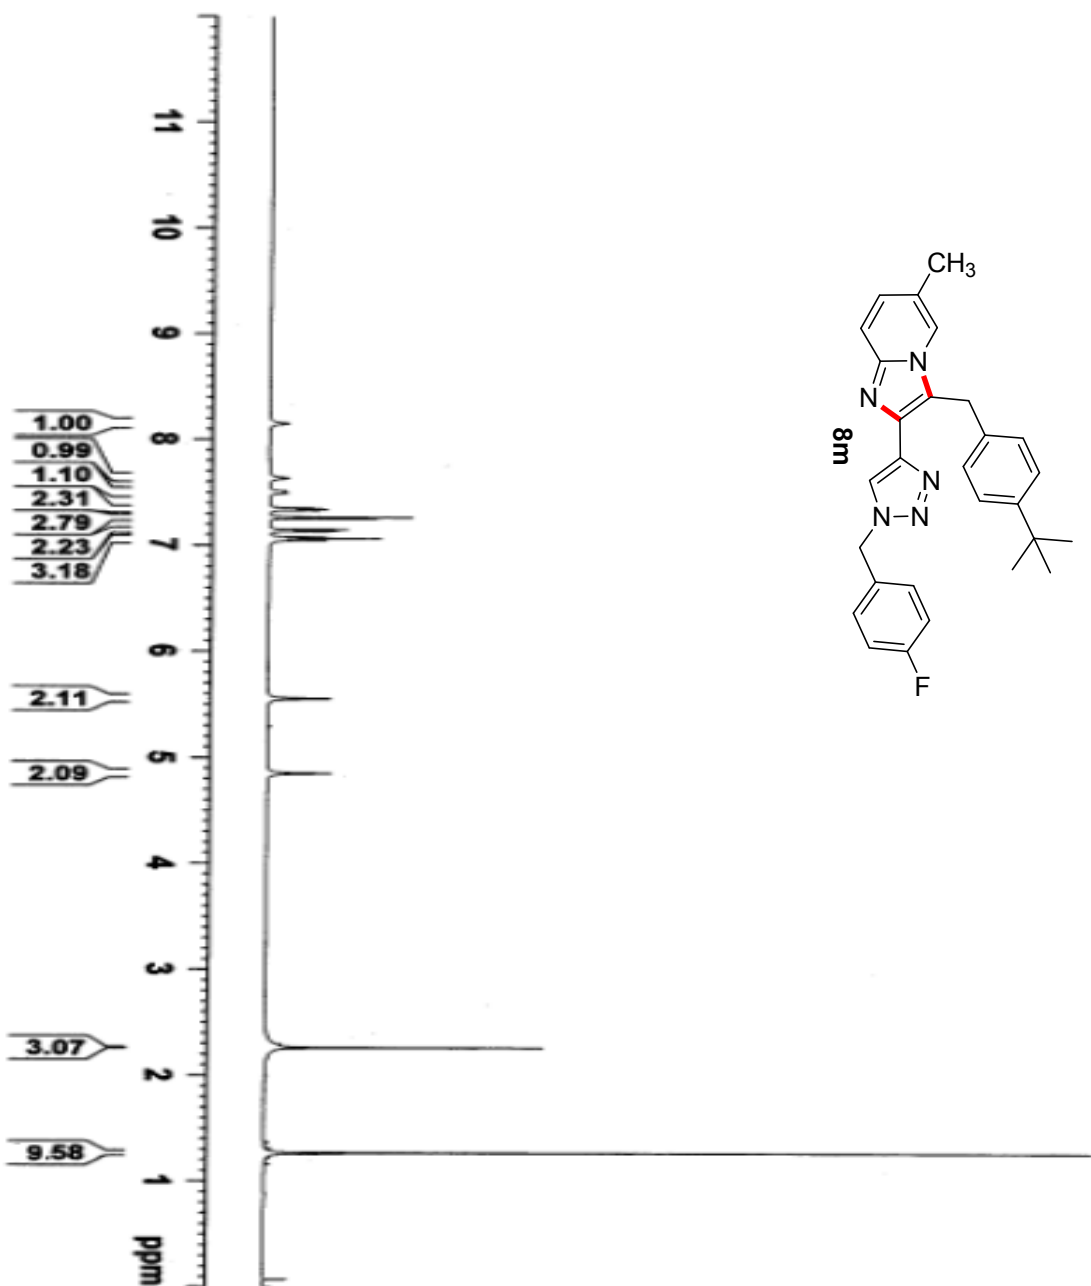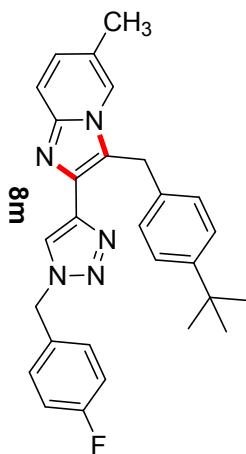

Current Data Parameters  
 NAME ALD\_FMG\_FR\_7.1R  
 EXTNO 1  
 PROCNO 1

F2 - Acquisition Parameters  
 Date\_ 20131023  
 Time 11.09  
 INSTRUM spect  
 PROBD 5 MM SBBO BB/  
 PULPROG zgpg30  
 TO 32768  
 SOLVENT DMF-D<sub>7</sub>  
 NS 16  
 DS 2  
 SFO 12019.230 Hz  
 FIDRES 0.360796 Hz  
 Aq 1.3631488 sec  
 RG 40.32  
 SW 41.600 kHz  
 FREQ 285.3 K  
 TE 298.3 K  
 D1 1.00000000 sec  
 TSD 1

===== CHANNEL f1 =====  
 SFO1 400.117063 MHz  
 NUCL1 1H  
 P1 12.00 usec  
 PL1 21.00000000 W

F2 - Processing parameters  
 SI 16384  
 SF 400.1170130 MHz  
 KW 2M  
 SFO 0  
 TA 0.30 Hz  
 GM 0  
 PC 1.00

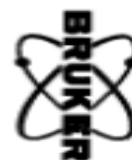

<sup>13</sup>C NMR spectra of 8m

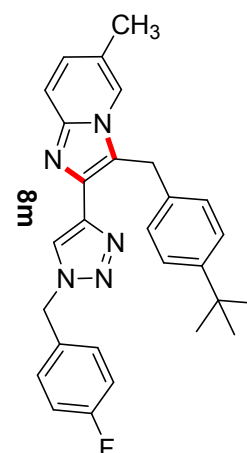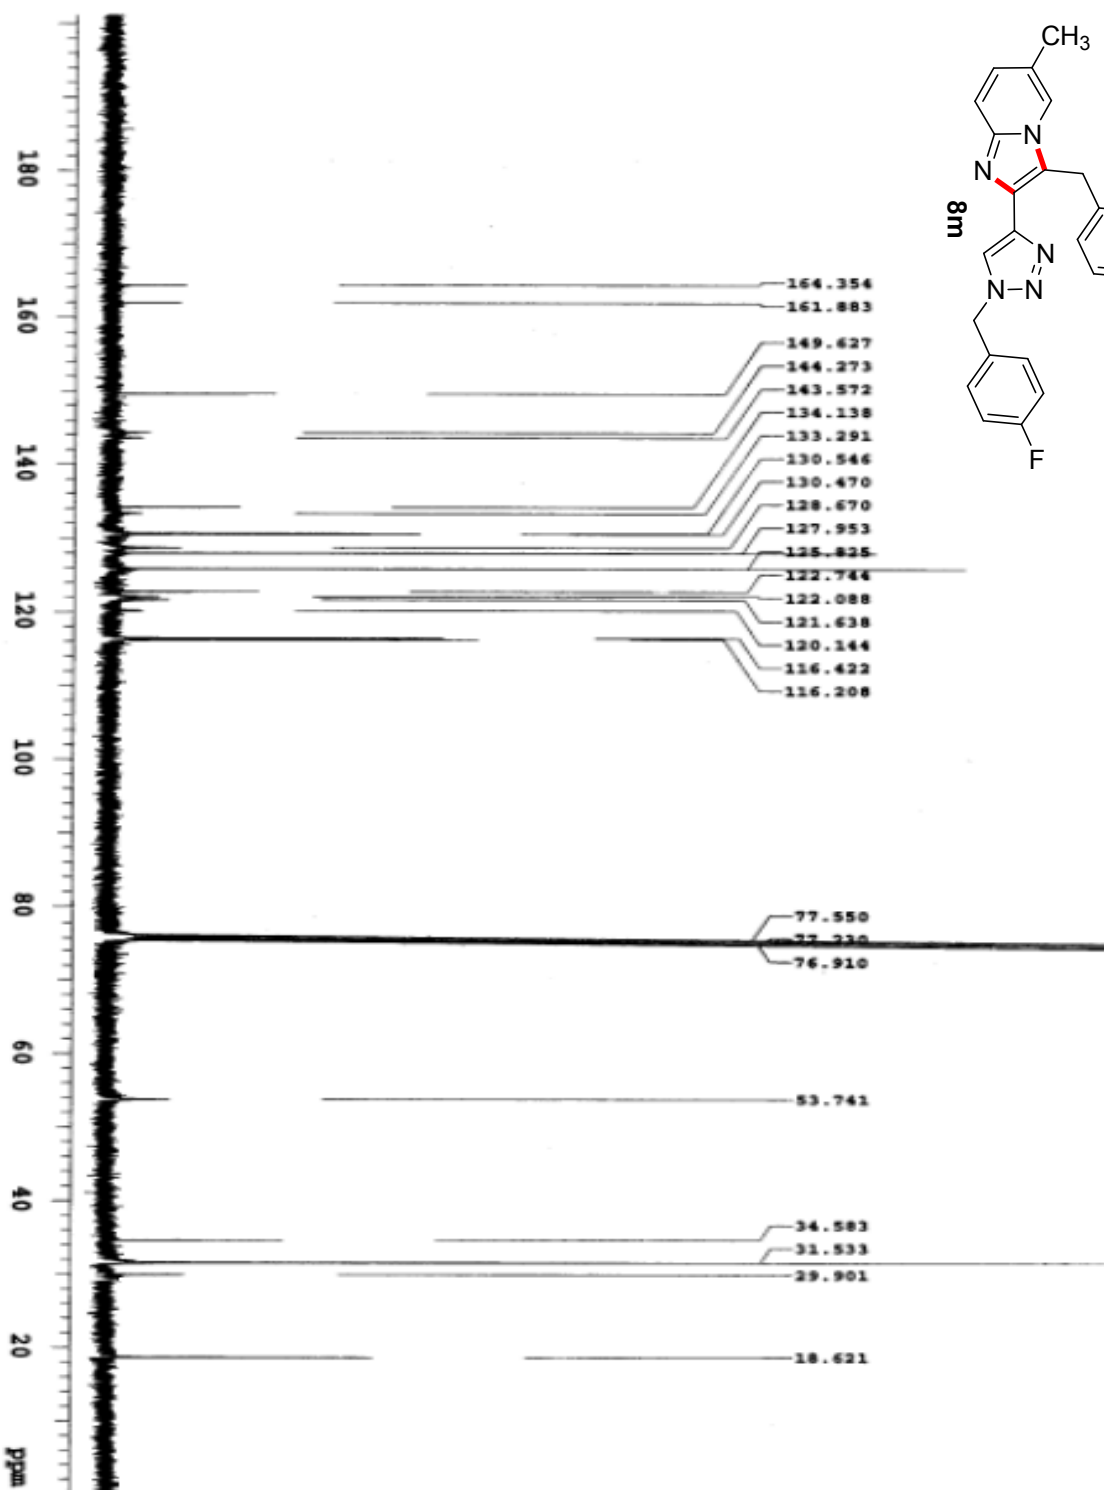

**PULSE SEQUENCE:** zgpg30  
 INSTRUMENT: spect  
 PULPROG: zgpg30  
 Acq. time 1.304 sec  
 WIDTH 25135.6 Hz  
 15460 repetitions

DATA PROCESSING: waltz16, 100, 5425617  
 DMSO-D6, 100, 399.8529994  
 Power: 40 dB  
 continuously on  
 WALTZ-16 modulated  
 Total time 9.9 hours

**NAME:** 8m-7R-13C  
**Solvent:** CDCl3  
 Temp: 25.0 C / 298.1 K  
 Operator: cbm  
**FILE:** ALD-8m-7R-13C  
 Mercury-400 \*ITV-8M8\*



HRMS spectra of 8m

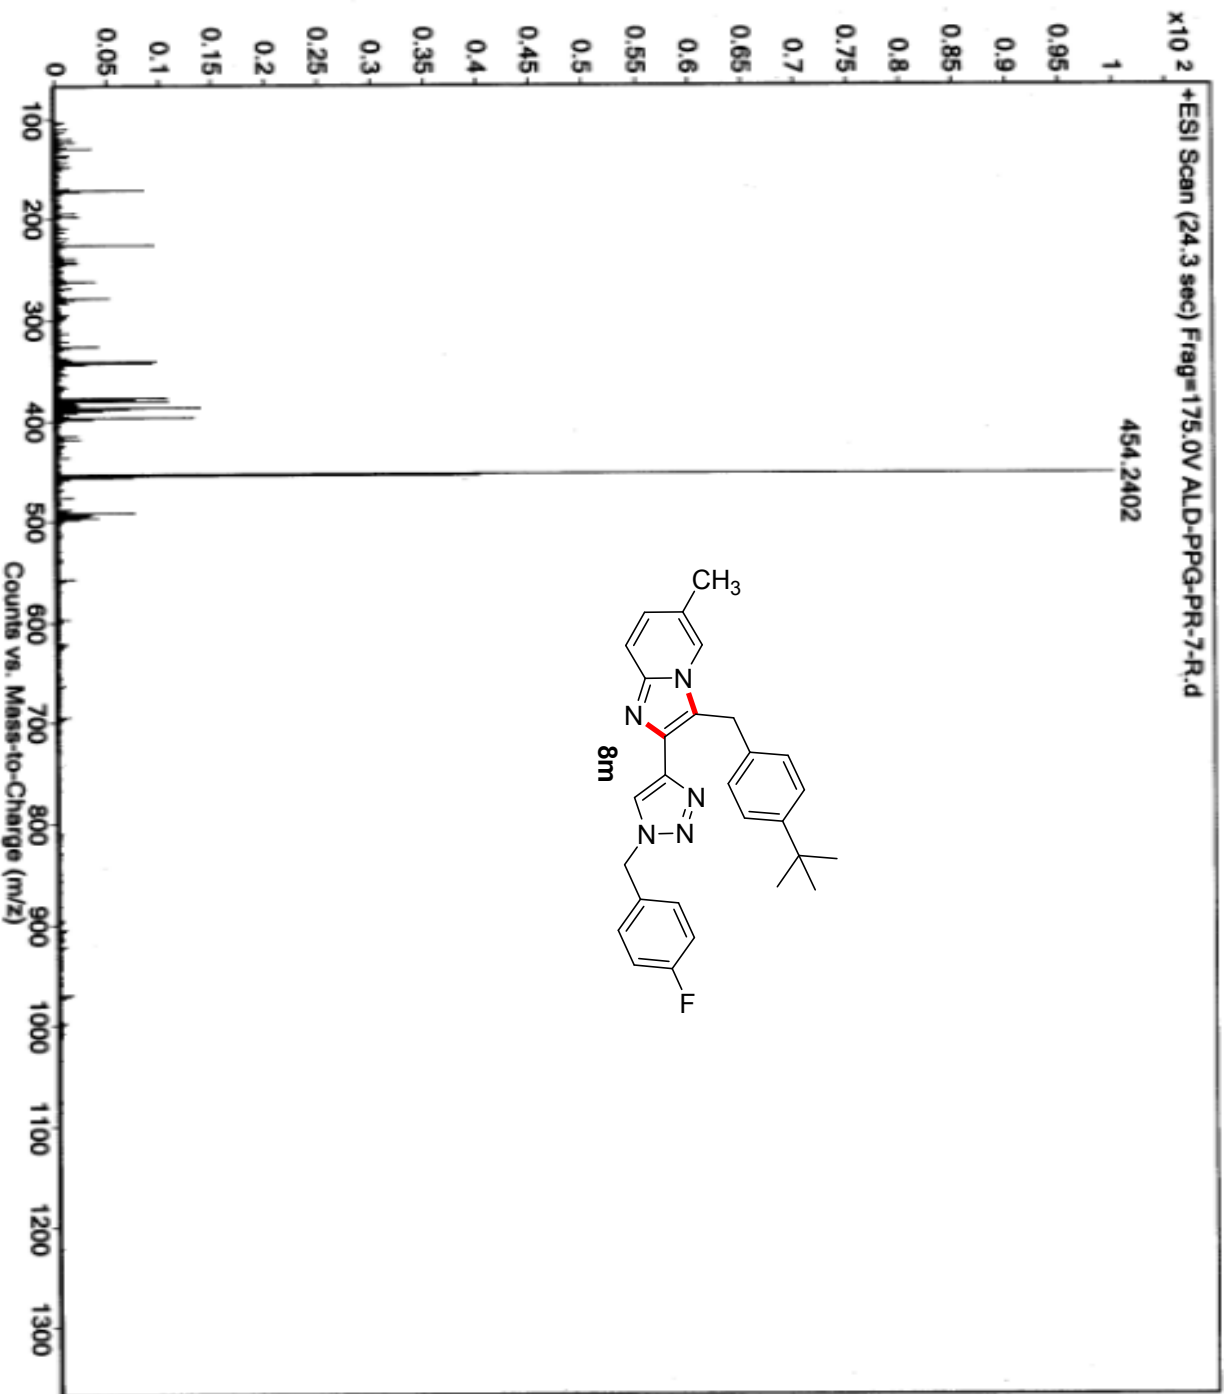

| Sample Name   | ALD-PPG-PR-7-R   | Position    | -1 | Instrument Name | Instrument 1 | User Name              |
|---------------|------------------|-------------|----|-----------------|--------------|------------------------|
| Inj Vol       | -10              | InjPosition |    | SampleType      | Sample       | IBM Calibration Status |
| Data Filename | ALD-PPG-PR-7-R.d | Acq Method  |    | Comment         |              | Acquired Time          |
|               |                  |             |    |                 |              | Success                |
|               |                  |             |    |                 |              | 3/18/2014 2:41:30 PM   |

<sup>1</sup>H NMR spectra of **8n**

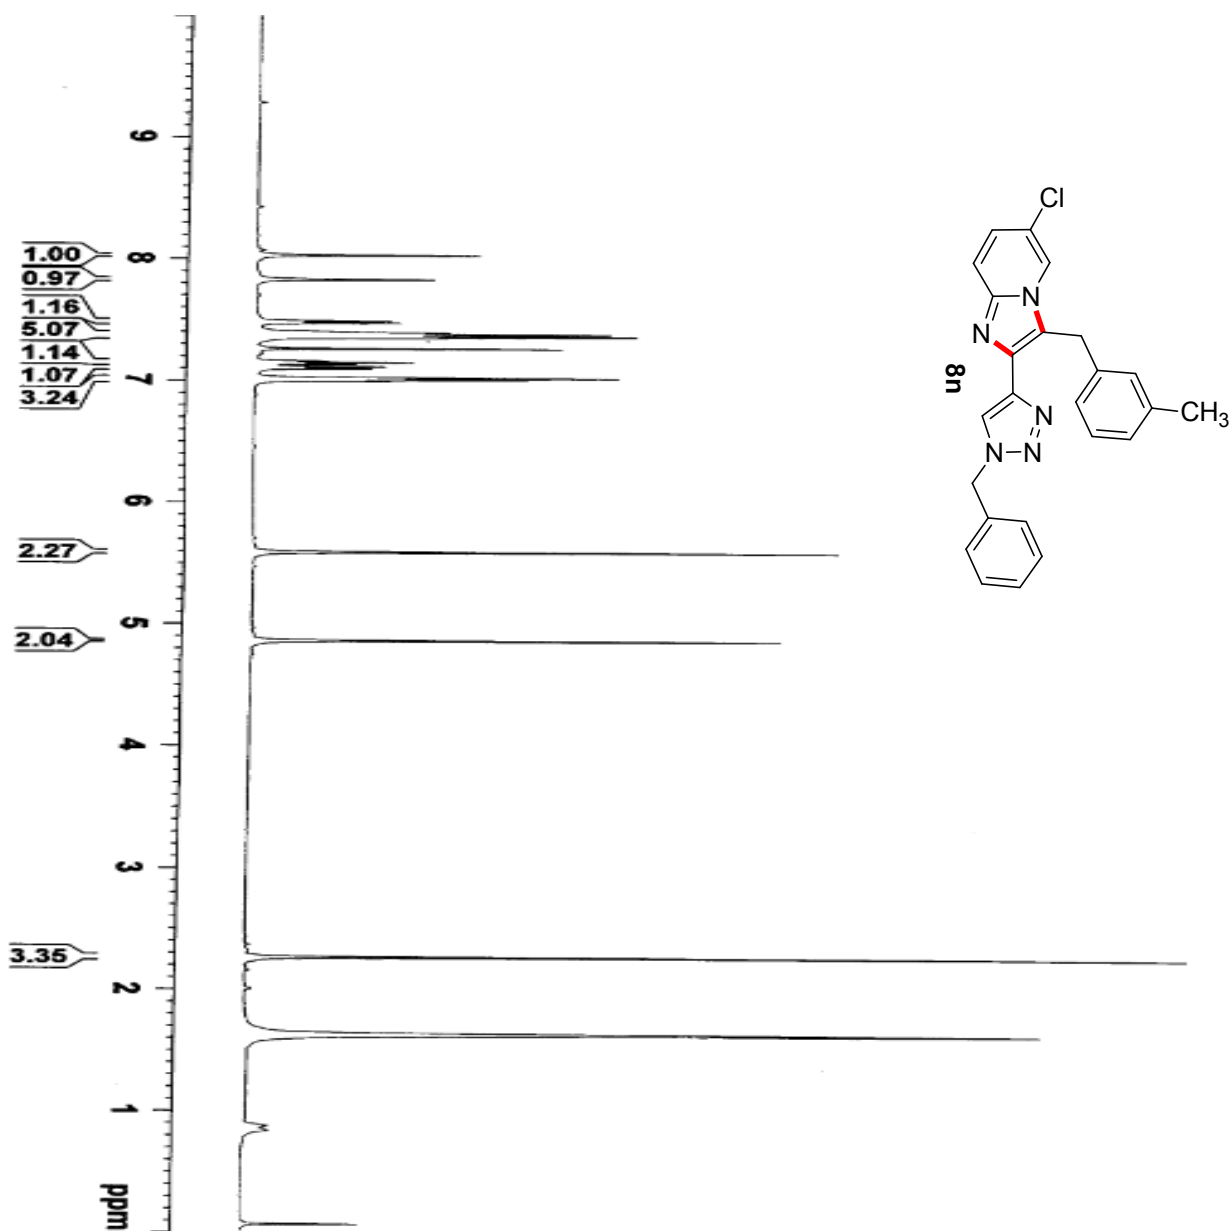

Current Data Parameters  
 NAME Pz-3-Ph-Me-1H  
 EXPNO 1  
 PROCNO 1  
 F2 - Acquisition Parameters  
 Date\_ 20130518  
 Time 16:55  
 INSTRUM spect  
 PROSD 5 mm NMRB1 DE/   
 PULPROG zgpg  
 TO 32768  
 SOLVENT CDCl3  
 NS 16  
 DS 2  
 SFO 12019.230 Hz  
 FIDRES 0.364799 Hz  
 AQ 1.3531488 sec  
 R0 140.33  
 DN 41.600 umc  
 DE 6.50 umc  
 TE 296.1 K  
 D1 1.0000000 sec  
 D11 1  
 210

===== CHANNEL f1 =====  
 SFO1 600.137063 MHz  
 NUC1 1H  
 P1 12.00 umc  
 PL1 21.0000000 W

F2 - Processing parameters  
 S1 16384  
 SF 600.137063 MHz  
 WDM 1H  
 SSB 0  
 LB 0.30 Hz  
 GB 0  
 PC 1.00



HRMS spectra of 8n

Sample Name  
Inj Vol  
Data Filename

Position  
InjPosition  
ACQ Method

Instrument Name  
SampleType  
Comment

User Name  
IRM Calibration Status  
Acquired Time

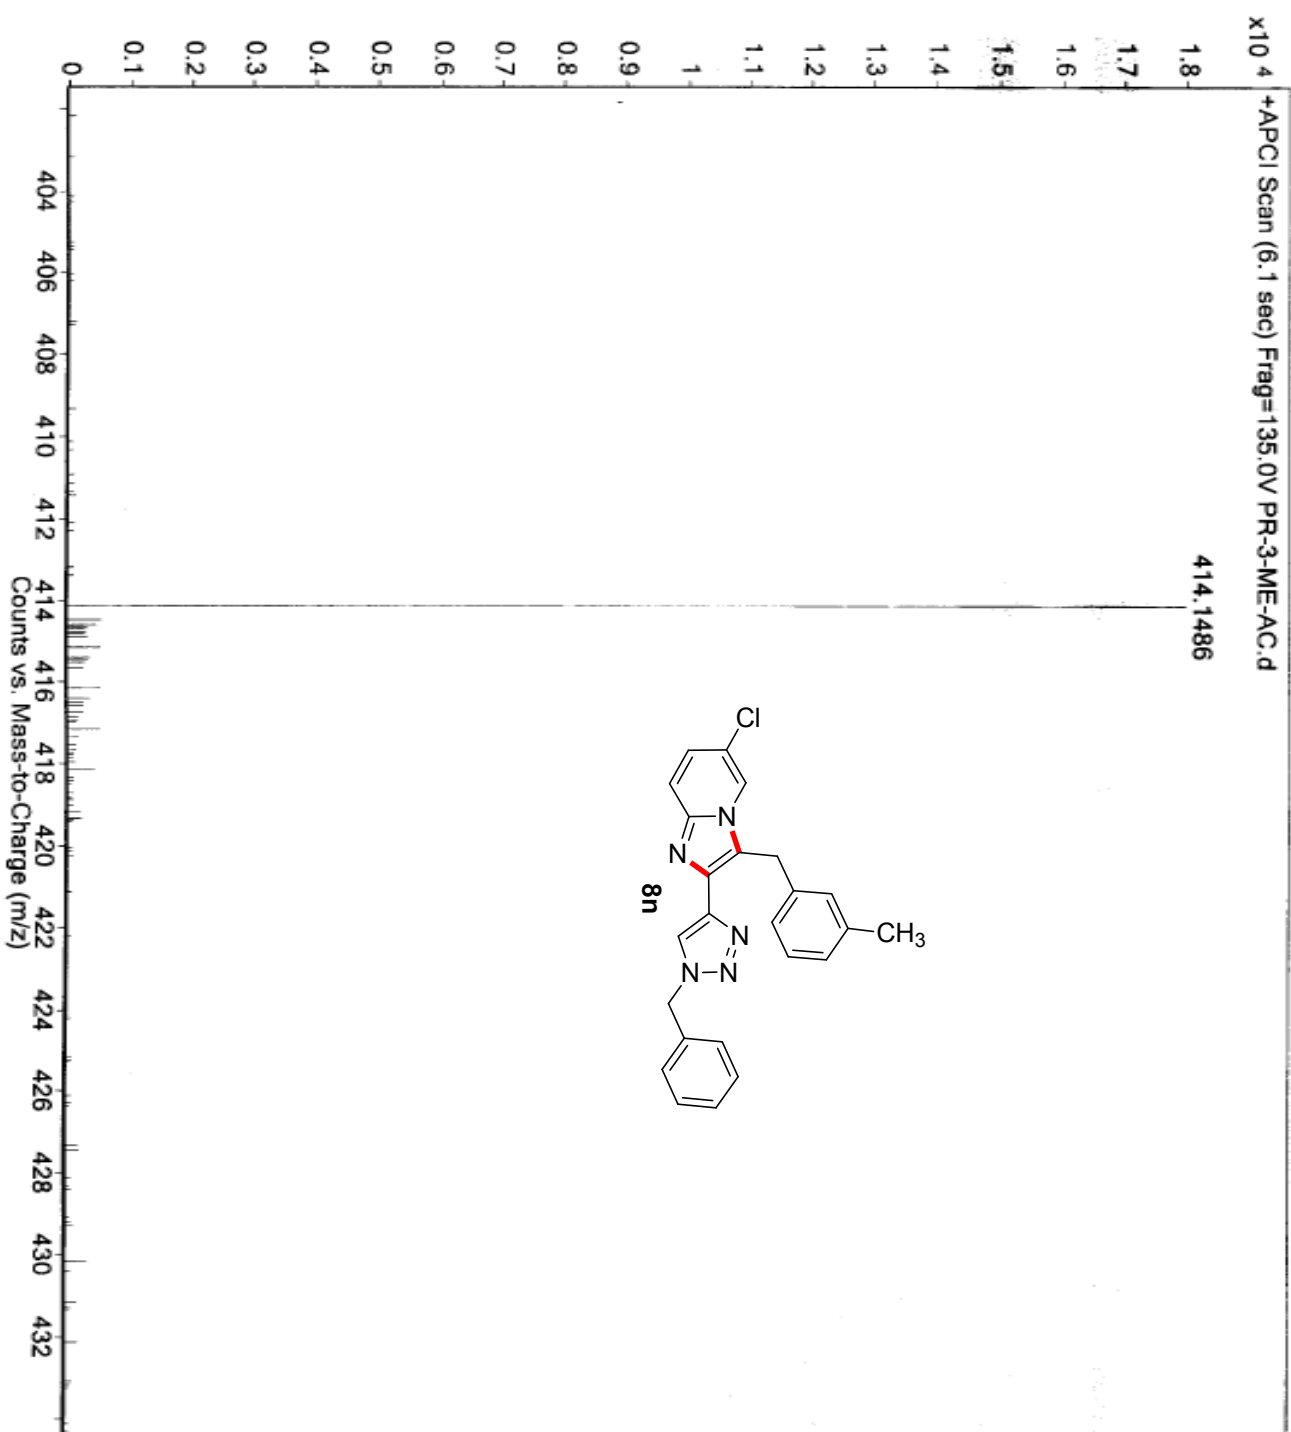

<sup>1</sup>H NMR spectra of **80**

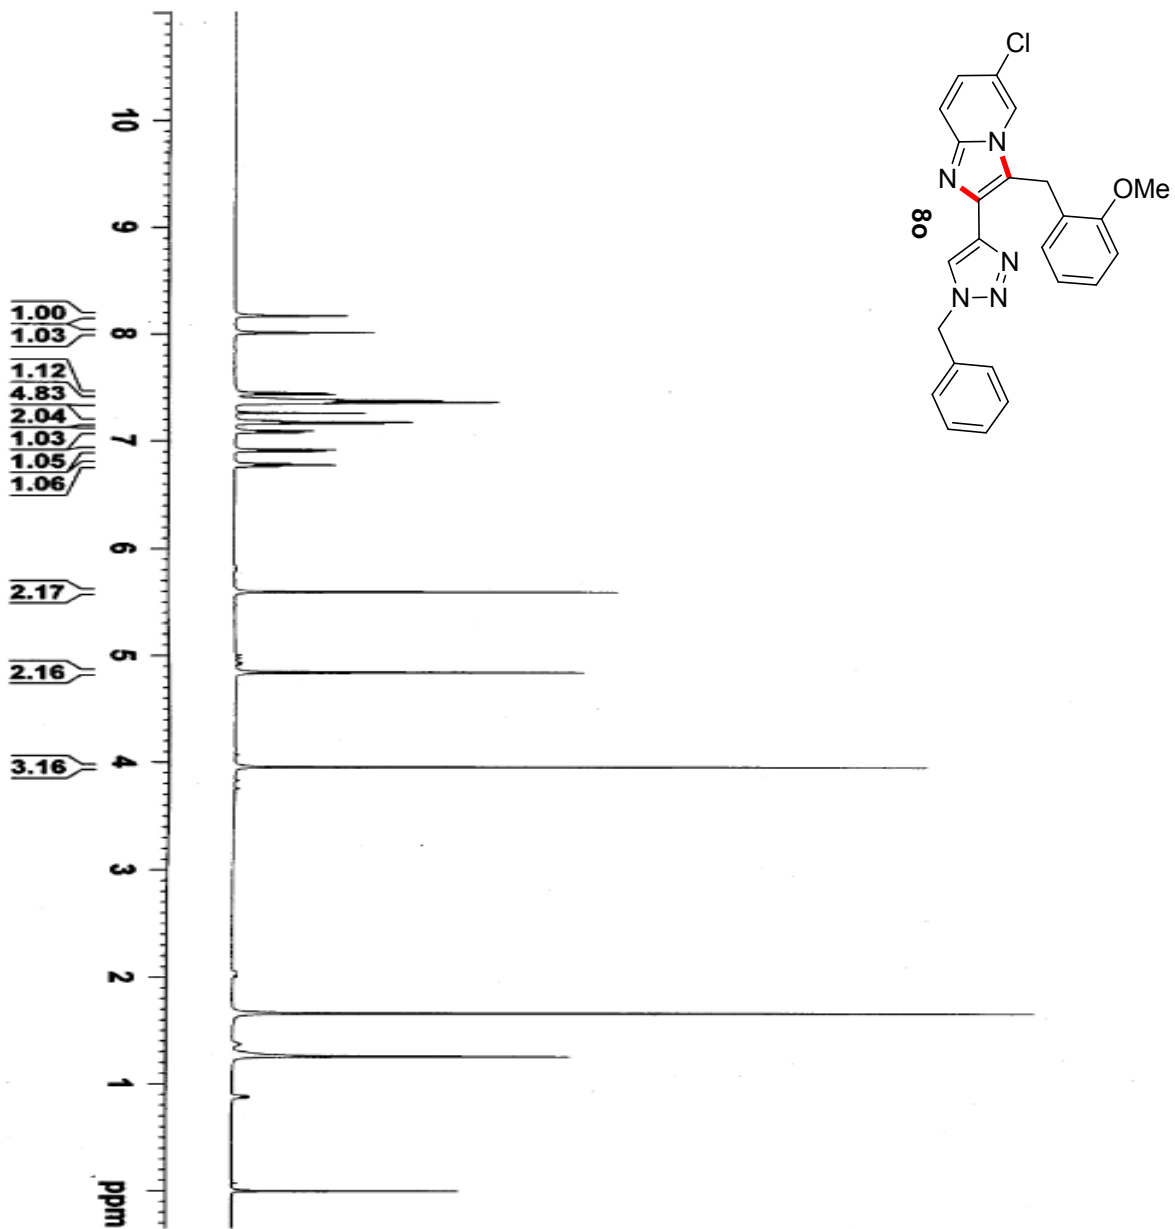

Current Data Parameters  
 NAME R8-2-06-40-118  
 EXPNO 1  
 PROCNO 1

F2 - Acquisition Parameters  
 DATE\_ 20150618  
 TIME 21:14  
 INSTRUM spect  
 PULPROG zgpg30  
 PROBRG 5 mm PABBO BB/  
 PZPRG06 2930  
 TD 32768  
 SOLVENT CDCl3  
 NS 16  
 DS 2  
 SWH 12019.230 Hz  
 FWHM 0.366798 Hz  
 AQ 1.3621488 sec  
 RG 89.67  
 DW 41.600 usec  
 DE 6.50 usec  
 TE 296.5 K  
 D1 1.00000000 sec  
 T10 1

===== CHANNEL f1 =====  
 SF01 600.137063 MHz  
 NUC1 1H  
 P1 12.00 usec  
 PL1 21.00000000 W

F2 - Processing parameters  
 SI 16384  
 SF 600.137063 MHz  
 NUX 1H  
 SFO 60  
 DS 0  
 LA 0 0.30 Hz  
 GB 0  
 PC 1.00

<sup>13</sup>C NMR spectra of **80**

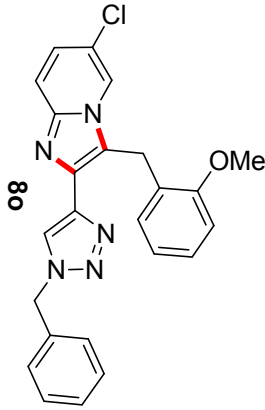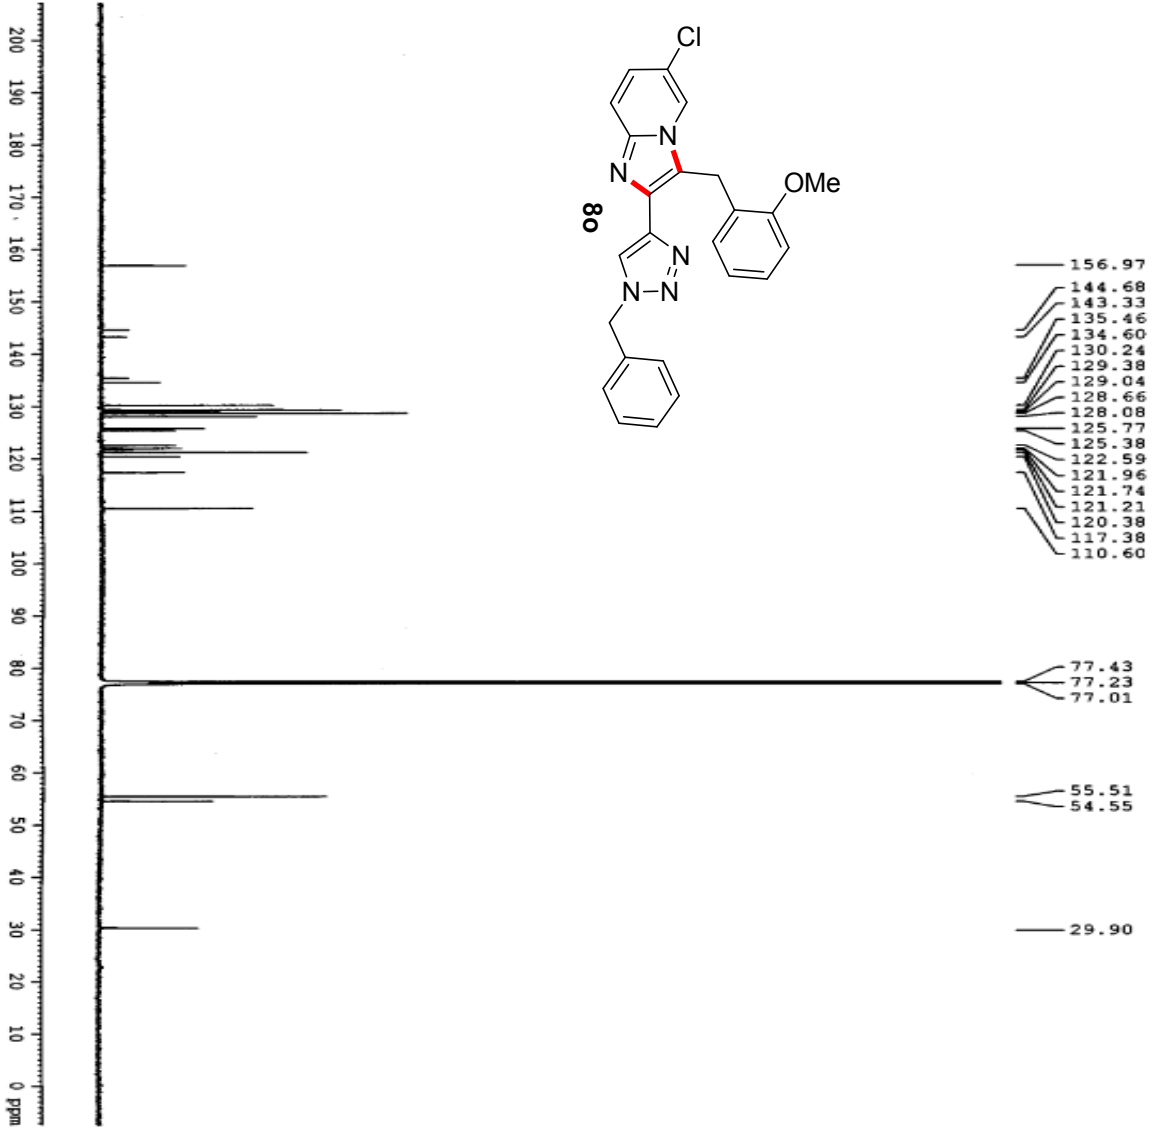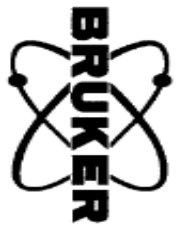

Current Data Parameters  
 NAME PR-2-OMe-NC-13C  
 EXPNO 1  
 PROCNO 1

F2 - Acquisition Parameters  
 Date\_ 20150618  
 Time 21.22

INSTRUM spect  
 PROBRD 5 mm PABBO BB/  
 PULPROG zgpg30  
 TD 32768  
 SOLVENT CDCl3  
 NS 14876  
 DS 2

SWH 36057.691 Hz  
 FIDRES 1.100393 Hz  
 AQ 0.4543829 sec  
 RG 65.24  
 DW 13.867 usec  
 DE 6.50 usec  
 TE 297.2 K  
 D1 2.00000000 sec  
 D11 0.03000000 sec  
 TD0 1

CHANNEL f1  
 SFO1 150.9279571 MHz  
 NUCL1 13C  
 P1 10.50 usec  
 PLW1 95.00000000 W

CHANNEL f2  
 SFO2 600.1724007 MHz  
 NUCL2 1H  
 CPOPRG12 waltz16  
 PCPDZ 70.00 usec  
 PLM2 21.00000000 W  
 PLM12 0.61714000 W  
 PLM13 0.30239999 W

F2 - Processing parameters  
 SI 16384  
 SF 150.9128351 MHz  
 WSM EM  
 SSB 0  
 LB 1.00 Hz  
 GB 0  
 PC 1.40

HRMS spectra of 80

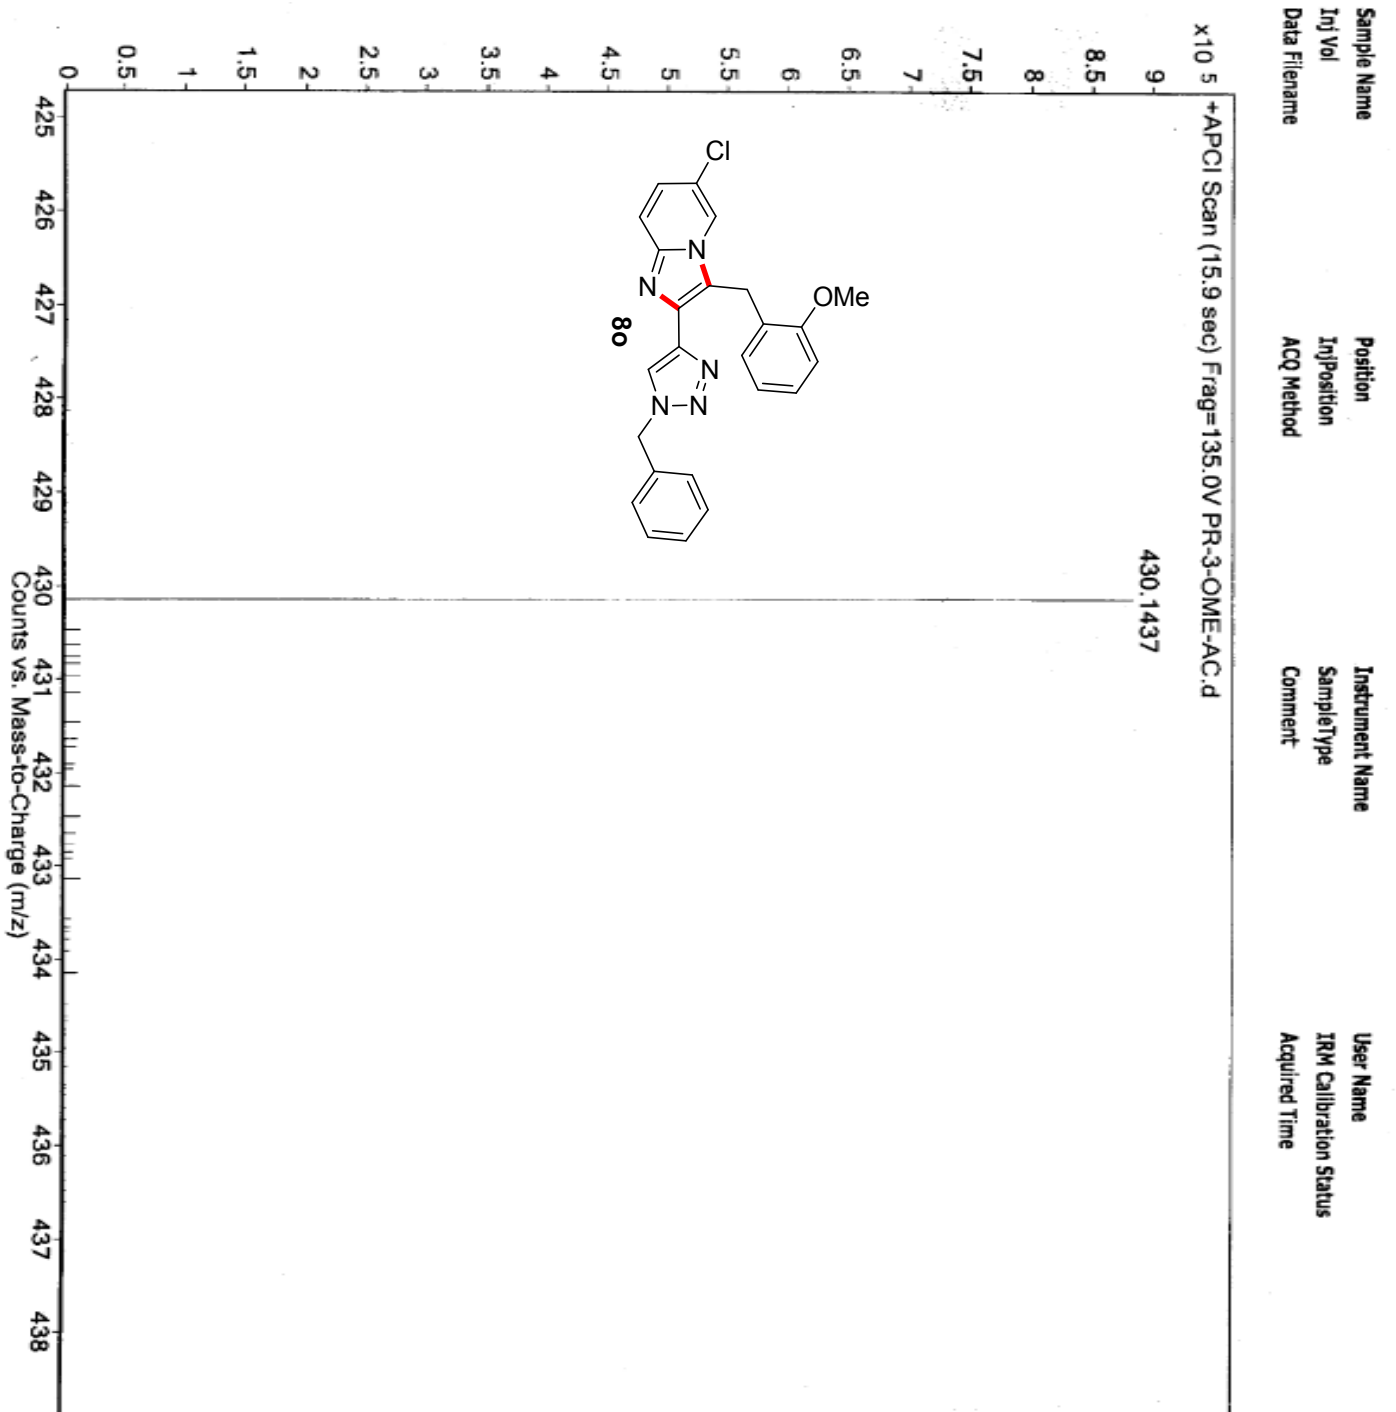

<sup>1</sup>H NMR spectra of 9a

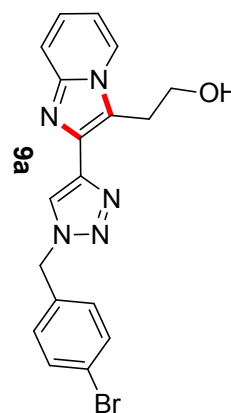

Sample Name: ALD-PTO-PR-22  
Data Collected on: 1170-NMR-marcuy400  
Acquire directory: /Doms/chem/data/study  
Sample directory: P1(CHEM)-SR-tit-4-01  
Yieldfile: ALD-PTO-PR-22  
Pulse sequence: PROTON (zgpg1)  
Solvent: cdcl3  
Data collected on: Feb 7 2014

Temp: 25.0 C / 298.1 K  
Operator: chm

Relax. delay 1.000 sec  
Pulse 45.0 degree  
Acq. time 2.561 sec  
Width 6398.0 Hz  
32 repetitions  
OBSERVE H1, 399.850668 MHz  
DATA PROCESSING  
F1 file 32768  
Total time 2 min 12 sec

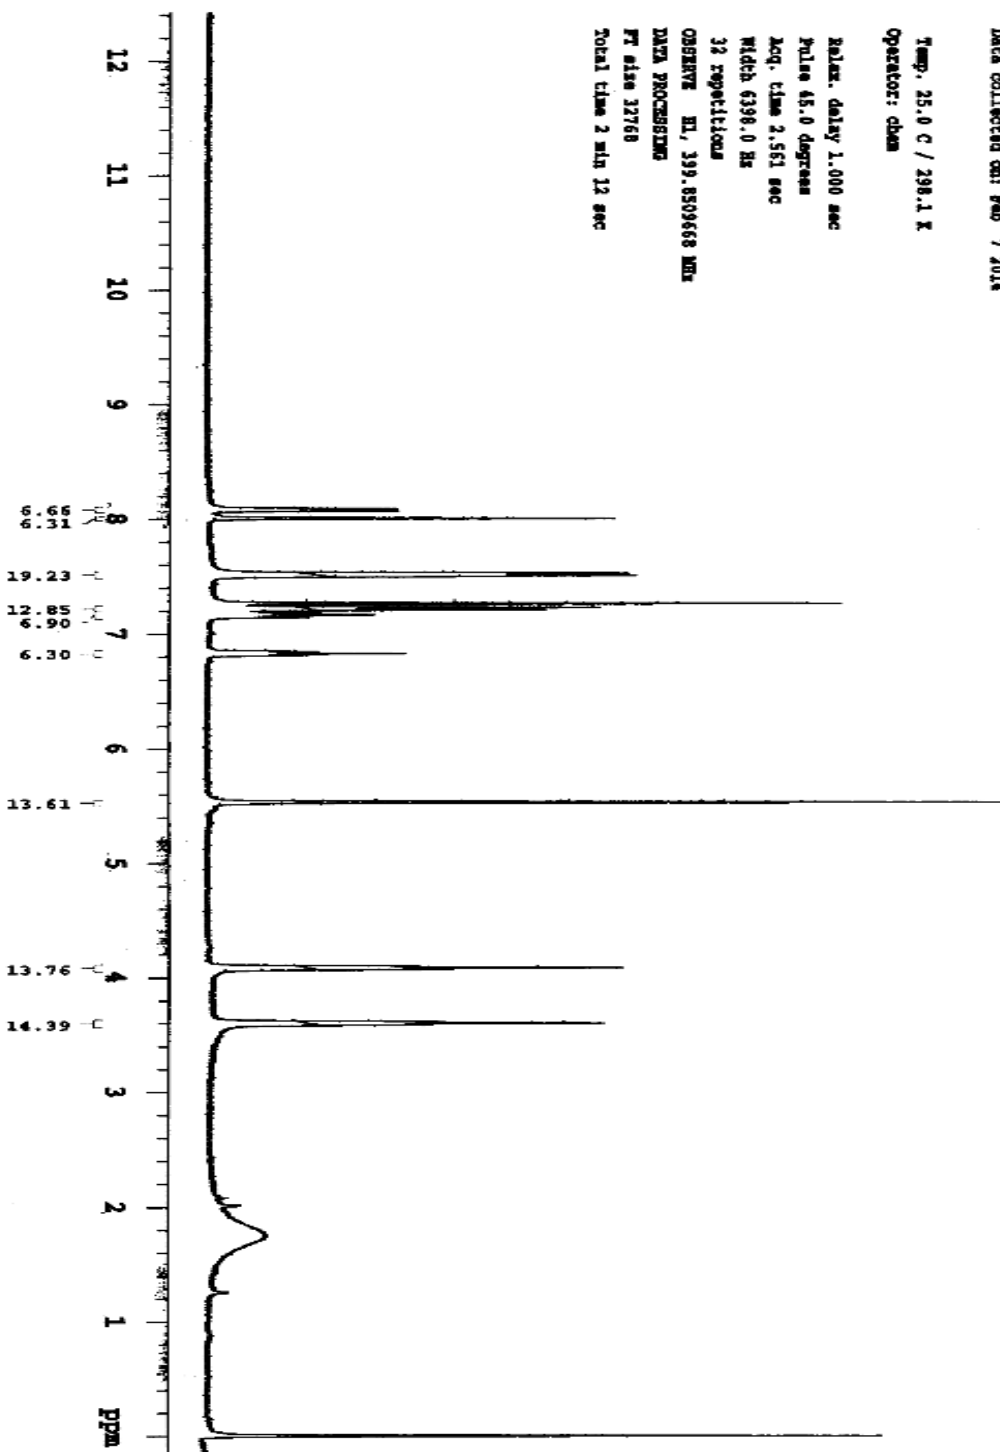



<sup>13</sup>C NMR spectra of 9a

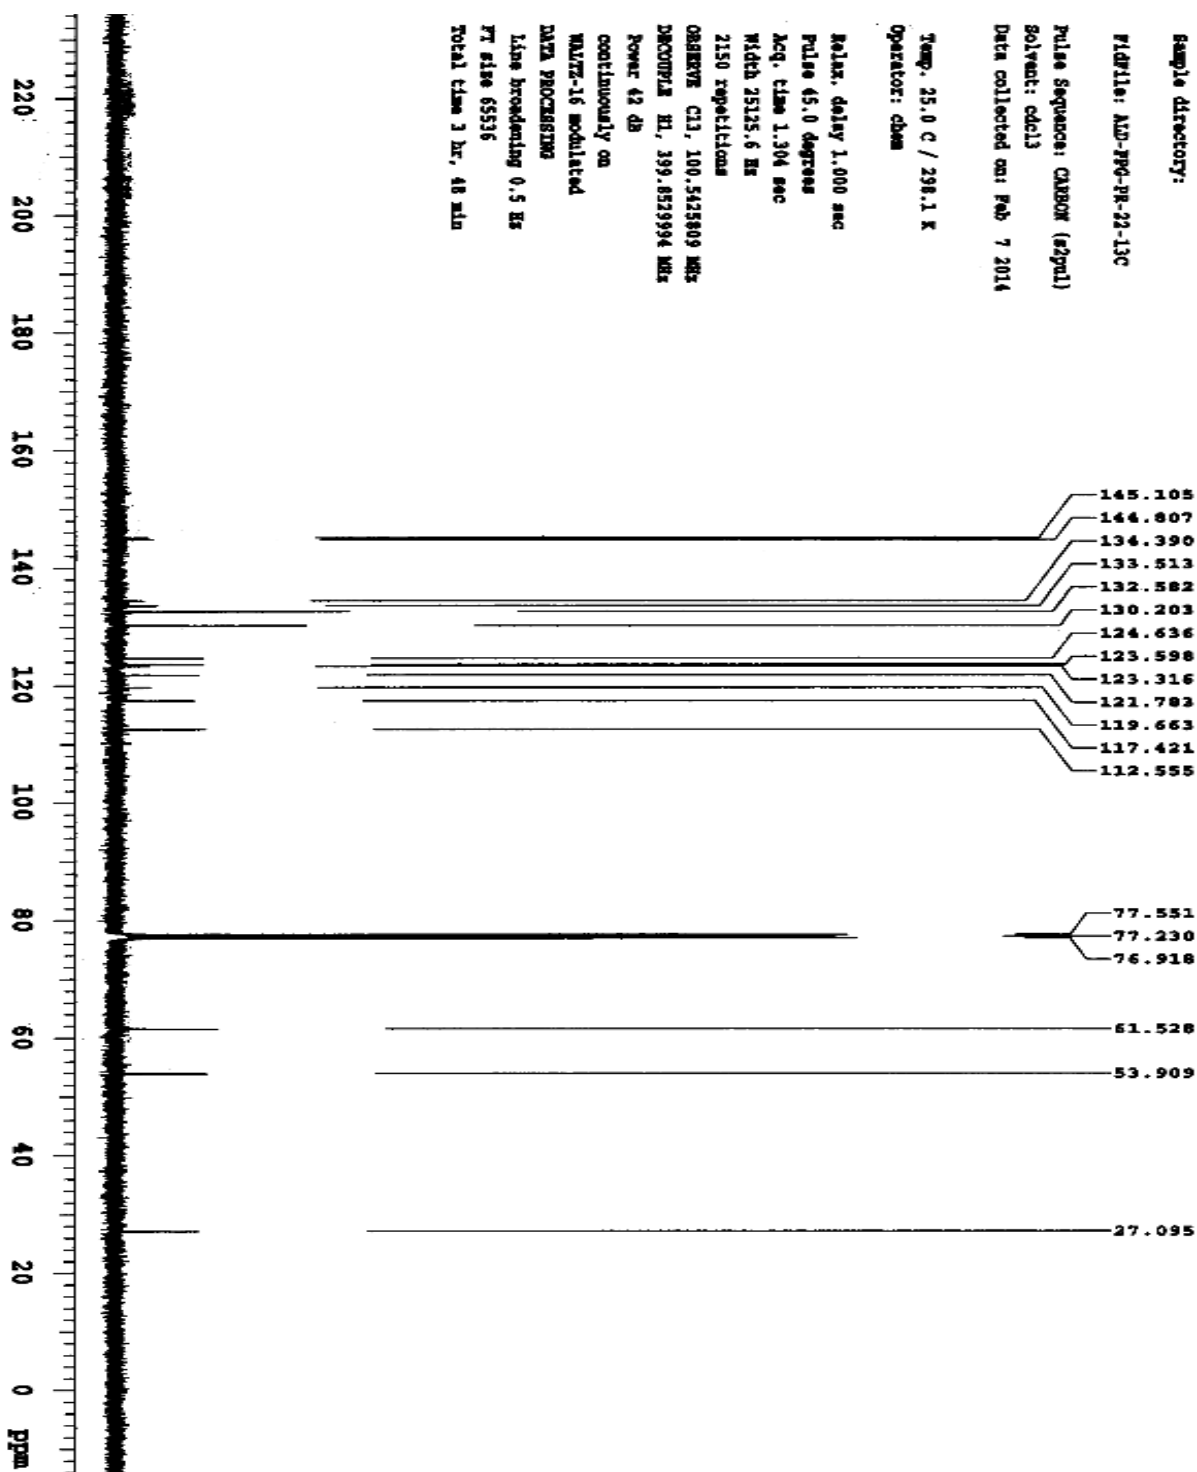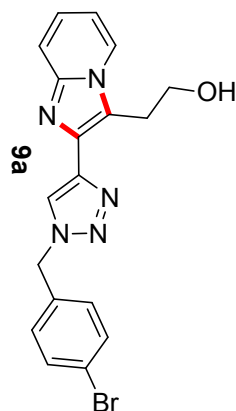

Sample Name: ALD-PP4-PP-22-13C  
 Data Collected on: 1170-NMR-mercury400  
 Archive directory: /export/home/chempack/mercury/data  
 Sample directory:  
 File(s): ALD-PP4-PP-22-13C  
 Pulse Sequence: CARBON (zgpg3)  
 Solvent: cdcl3  
 Data collected on: Feb 7 2014  
 Temp: 25.0 C / 298.1 K  
 Operator: cbam  
 Relax. delay 1.000 sec  
 Pulse 45.0 degrees  
 Acq. time 1.304 sec  
 Width 25125.6 Hz  
 2150 repetitions  
 OBSERVE C13, 100.542809 MHz  
 DECUPLE H1, 399.852994 MHz  
 Power 42 db  
 continuously on  
 NALYZ-16 modulated  
 DATA PROCESSING  
 Line broadening 0.5 Hz  
 FT size 65536  
 Total time 3 hr, 48 min

HRMS spectra of 9a

|               |                 |             |    |                 |              |                        |                      |
|---------------|-----------------|-------------|----|-----------------|--------------|------------------------|----------------------|
| Sample Name   | ALB-PPG-PR-22   | Position    | -1 | Instrument Name | Instrument 1 | User Name              |                      |
| Inj Vol       | -10             | InjPosition |    | SampleType      | Sample       | IRM Calibration Status |                      |
| Data Filename | ALB-PPG-PR-22.d | ACQ Method  |    | Comment         |              | Acquired Time          | 3/20/2014 9:54:38 AM |
|               |                 |             |    |                 |              |                        | Success              |

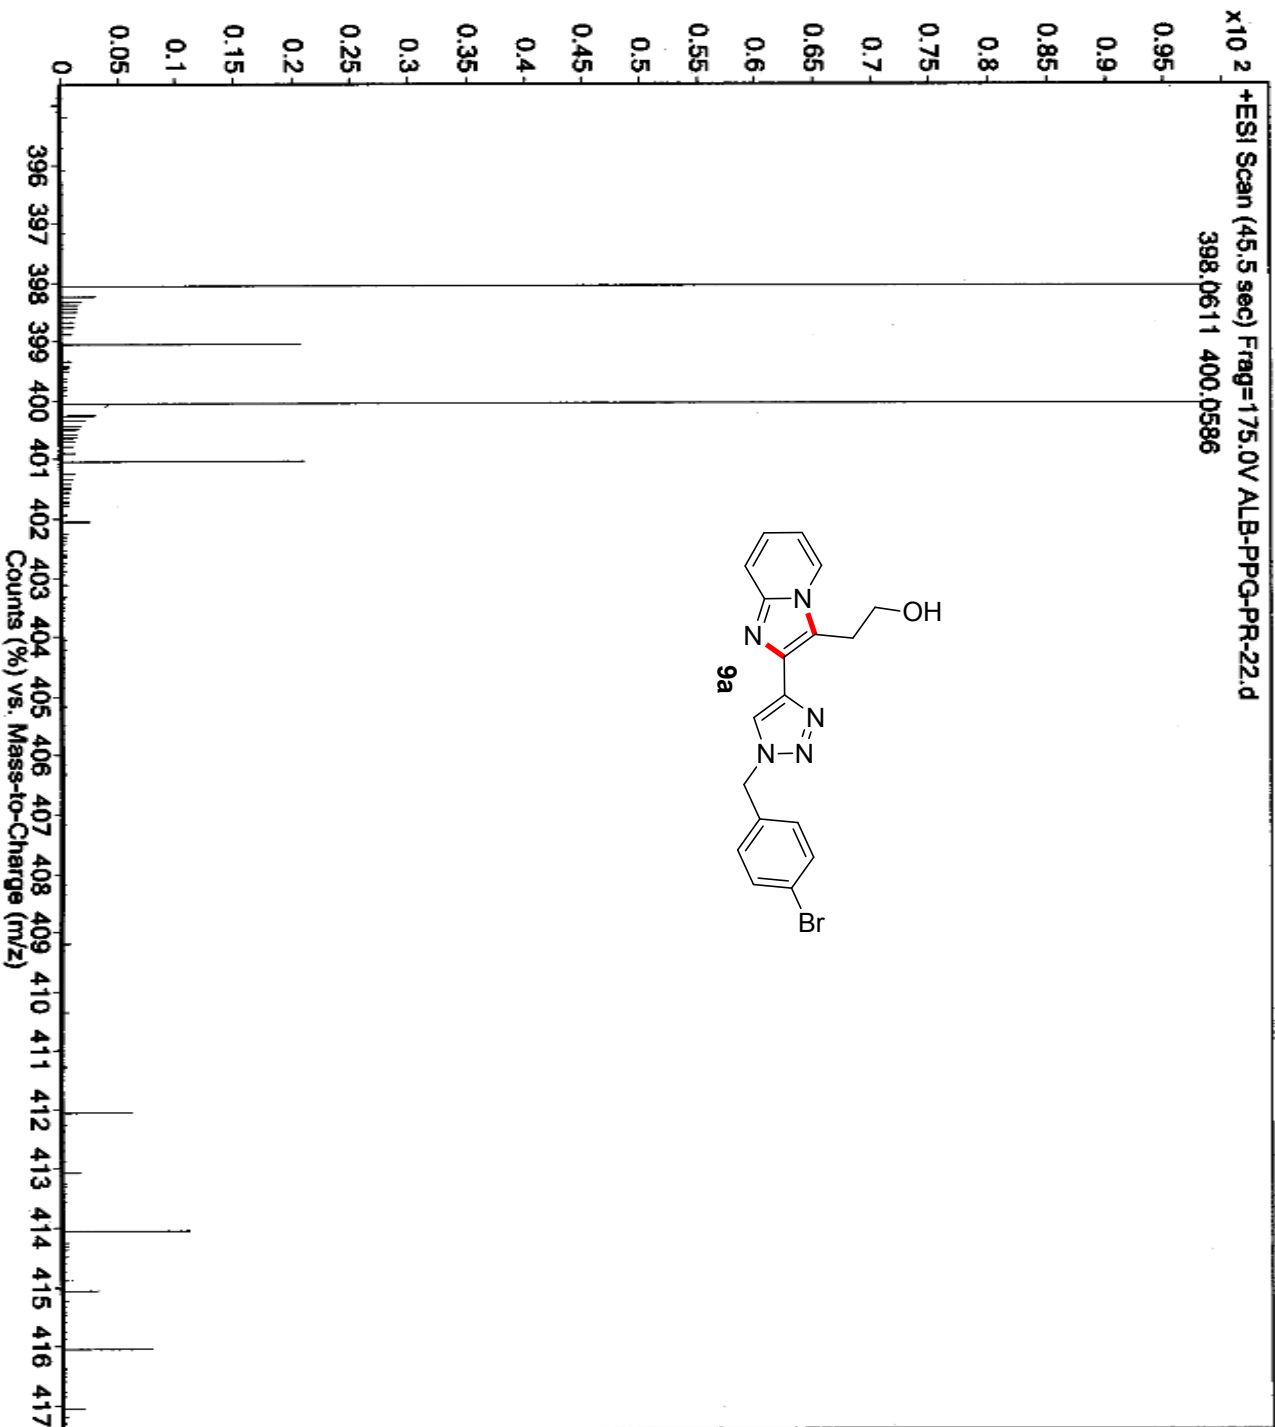

<sup>1</sup>H NMR spectra of **9b**

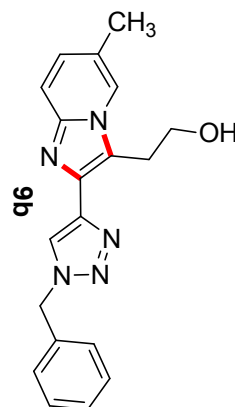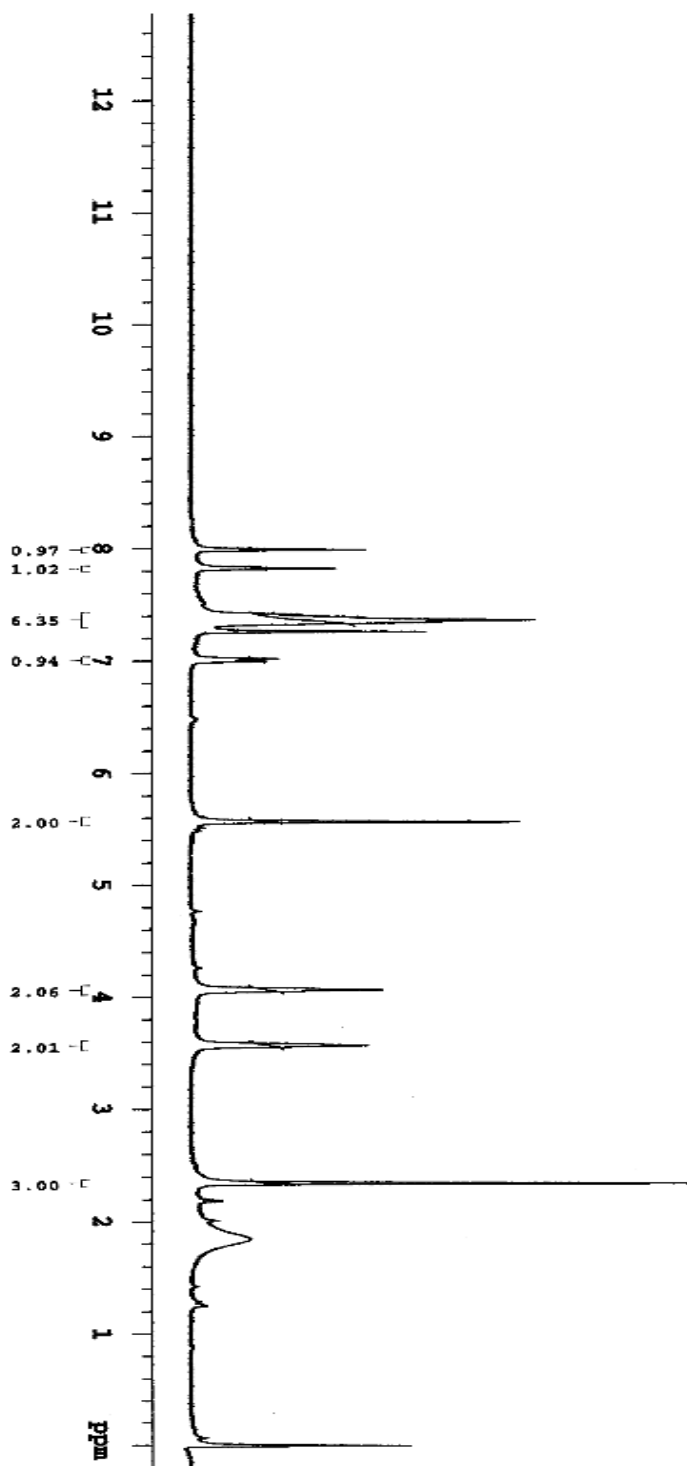

|                                                                                                                                                                                                                                     |                                        |                                                                                                            |                                                                                                                                                                                                                                  |
|-------------------------------------------------------------------------------------------------------------------------------------------------------------------------------------------------------------------------------------|----------------------------------------|------------------------------------------------------------------------------------------------------------|----------------------------------------------------------------------------------------------------------------------------------------------------------------------------------------------------------------------------------|
| <p><b>PROBHD SEQUENCE</b><br/>                 Relax. delay 1.000 sec<br/>                 Pulse 45.0 degrees<br/>                 Acq. time 2.561 sec<br/>                 Width 6398.0 Hz<br/>                 33 repetitions</p> | <p><b>OBSERVED F1</b>, 399.8509534</p> | <p><b>DATA PROCESSING</b><br/>                 F1 size 32768<br/>                 Total time 1 minutes</p> | <p><b>AXD-PPG-PR-23</b><br/>                 Solvent: CDCl3<br/>                 Temp: 25.0 C / 298.1 K<br/>                 Operator: chm<br/>                 File: AXD-PPG-PR-23R<br/>                 Mercury-400 1H-1MR</p> |
|-------------------------------------------------------------------------------------------------------------------------------------------------------------------------------------------------------------------------------------|----------------------------------------|------------------------------------------------------------------------------------------------------------|----------------------------------------------------------------------------------------------------------------------------------------------------------------------------------------------------------------------------------|

<sup>13</sup>C NMR spectra of 9b

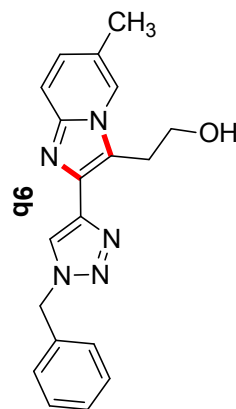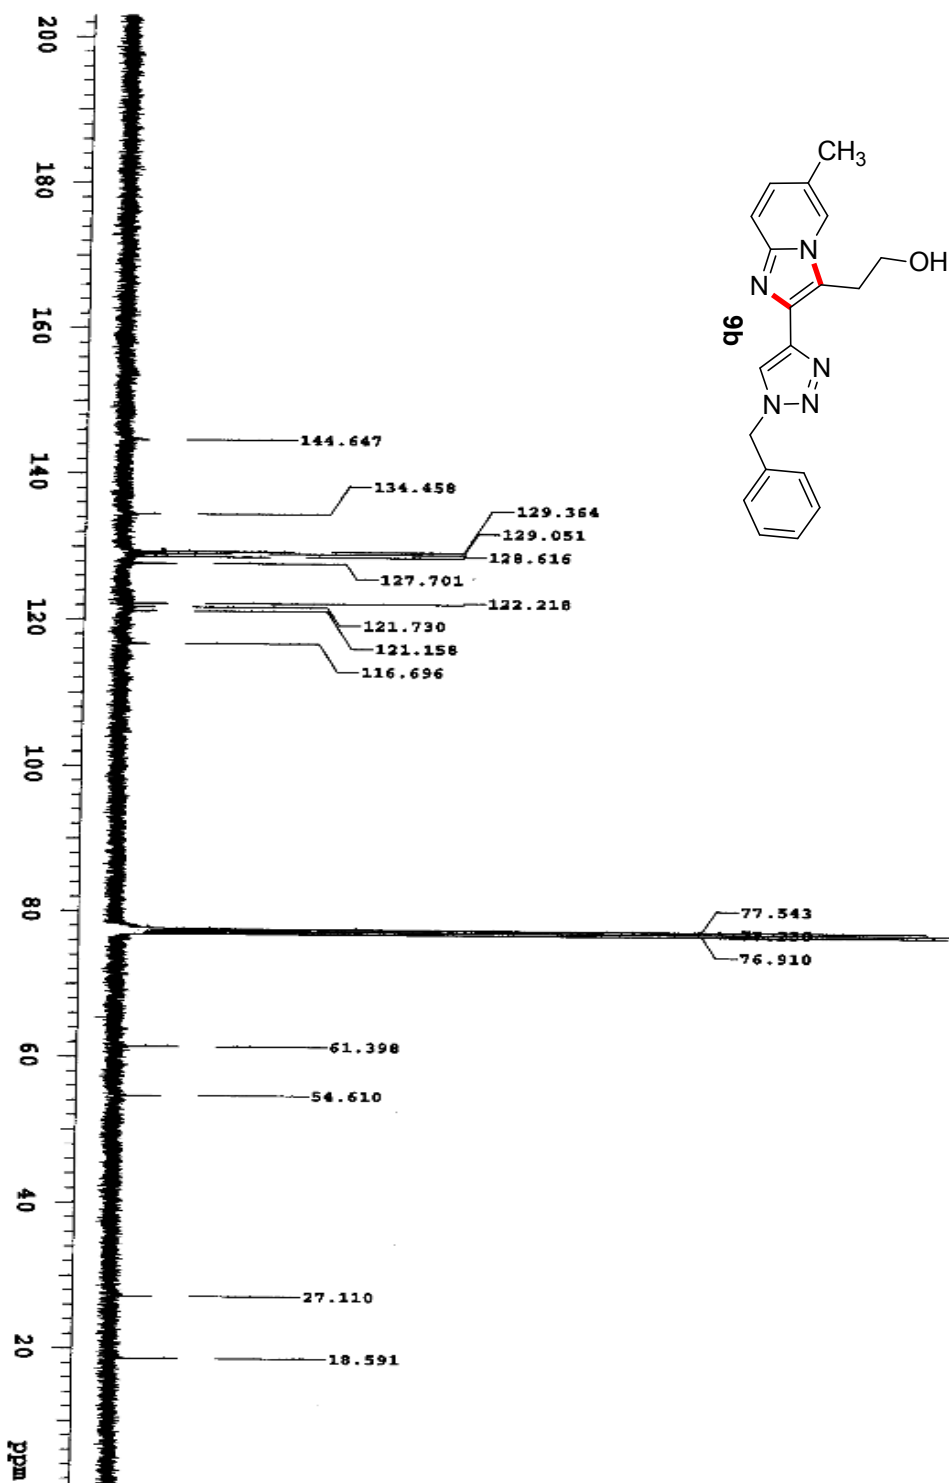

PPHASE SEQUENCE  
Relax. delay 1.000 sec  
Pulse 45.0 degrees  
Acq. time 1.304 sec  
Width 25125.6 Hz  
2730 repetitions

OBSERVE C13, 4005428832  
DECOUPLE H1, 399.8529994  
Power 42 dB  
continuously on  
WALTZ-16 modulated

DATA PROCESSING  
line broadening 0.5 Hz  
FT size 65536  
Total time 104 minutes

ALD-PRQ-PR-23-45PC  
Solvent: cdcl3  
Temp. 25.0 C / 298.1 K  
Operator: chas  
Mercury-400 "UNITY-NMR"

HRMS spectra of 9b

|               |                 |              |    |                 |              |                        |                      |
|---------------|-----------------|--------------|----|-----------------|--------------|------------------------|----------------------|
| Sample Name   | ALB-PPG-PR-23   | Position     | -1 | Instrument Name | Instrument 1 | User Name              |                      |
| Inj Vol       | -10             | Inj Position |    | Sample Type     | Sample       | IRM Calibration Status | Success              |
| Data Filename | ALB-PPG-PR-23.d | Acq Method   |    | Comment         |              | Acquired Time          | 3/20/2014 9:56:36 AM |

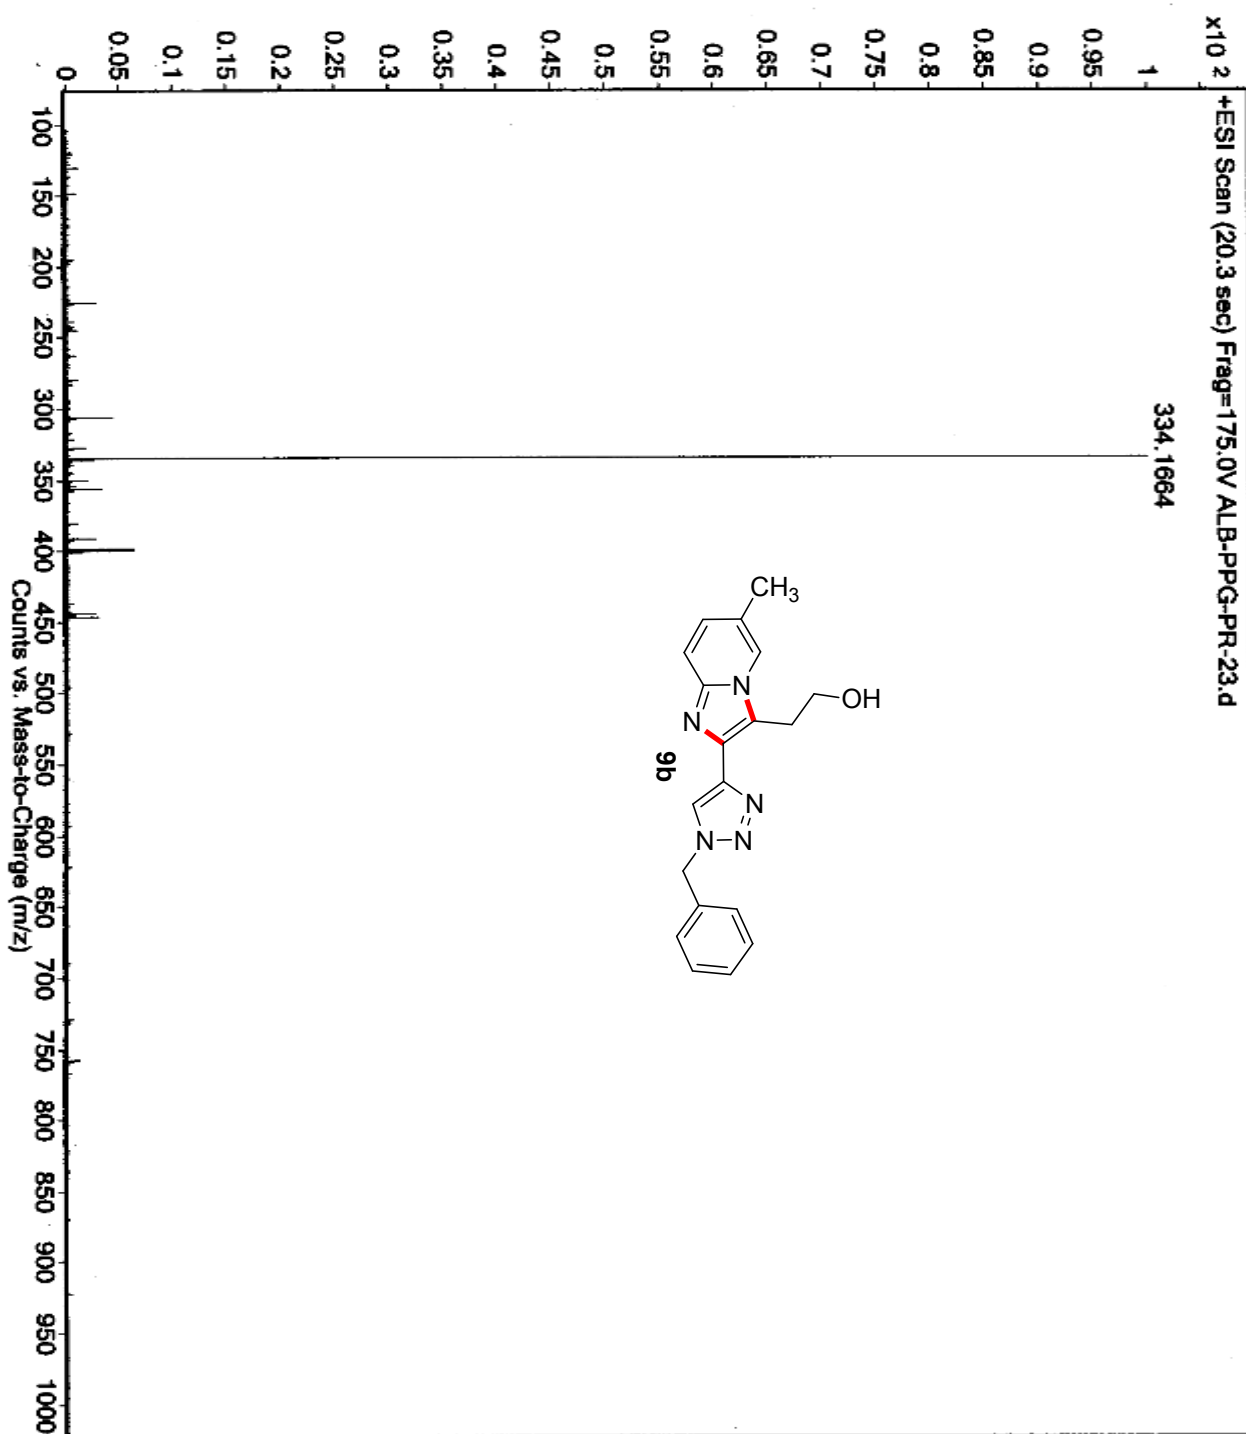

<sup>1</sup>H NMR spectra of 9c

Sample Name:  
MID-PPQ-PR-21  
Date Collected on:  
11/9-11/9-mercury400  
Archive directory:  
/export/home/chempack/vmurya/data  
Sample directory:

Yield: MID-PPQ-PR-21A

Pulse Sequence: zgpg30 (zgpg1)  
Solvent: cdcl3  
Data collected on: Feb 9 2014

Temp. 25.0 C / 298.1 K  
Operator: cbm

Relax. delay 1.000 sec  
Pulse 45.0 degrees  
Acq. time 2.561 sec  
Width 6398.0 Hz  
32 repetitions  
OBSERVE: H1, 399.850637 MHz  
DATA PROCESSING  
PT: also 32768  
Total time 2 min 12 sec

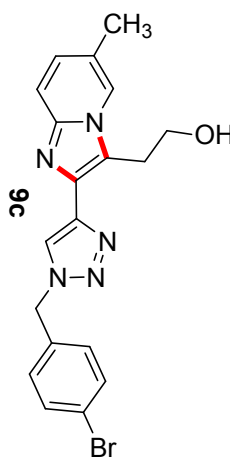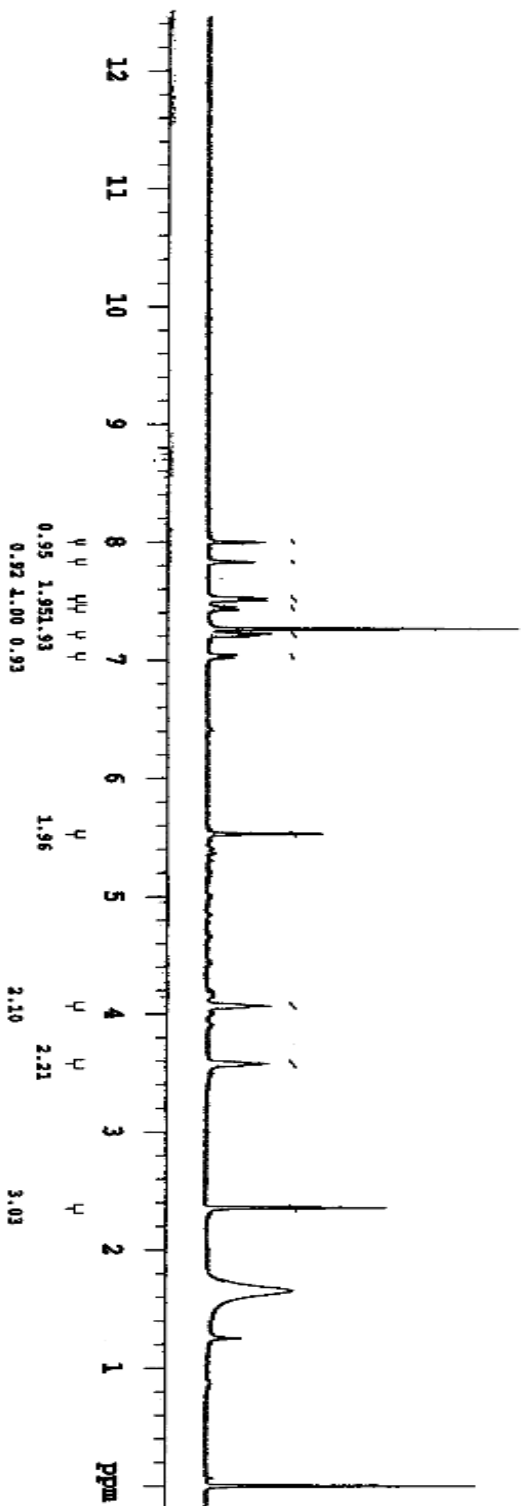

<sup>13</sup>C NMR spectra of 9c

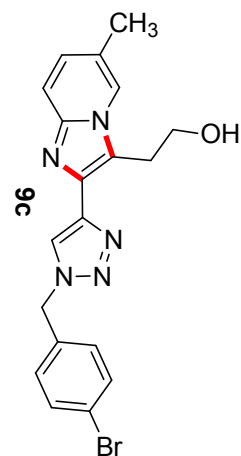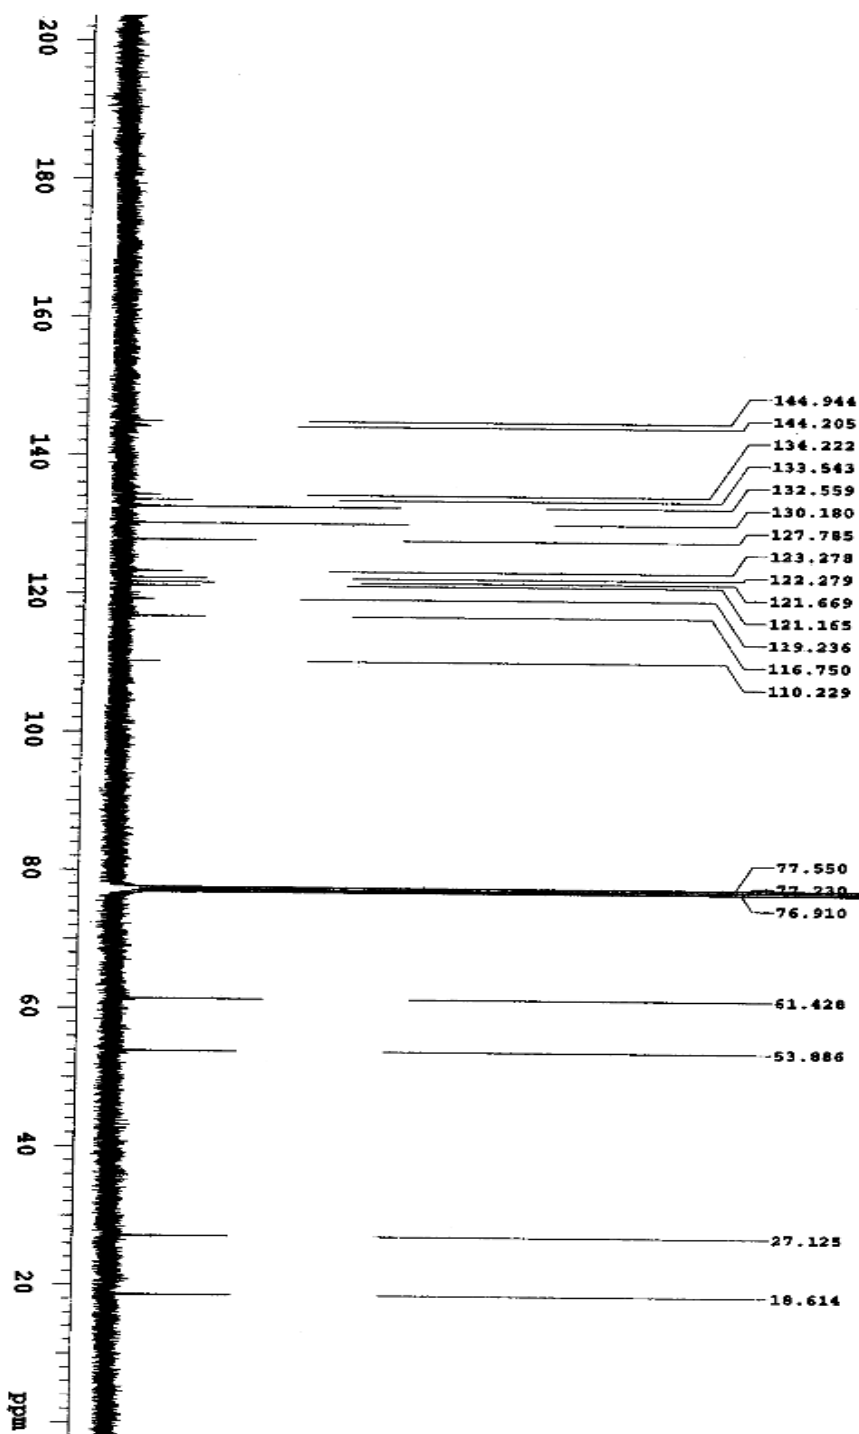

EXPERIMENTAL  
Pulse delay 1.000 sec  
Pulse 45.0 degrees  
Acq. time 1.304 sec  
Width 25125.6 Hz  
4000 repetitions

DATA ACQUISITION  
DIRCONTROL: 399.8529994  
Power: 48 dB  
continuously on  
MULTI-16 Modulated

DATA PROCESSING  
Line broadening 0.5 Hz  
PT also 6536  
Total time 2.6 hours

NAME: 399.8529994-13C  
Solvent: CDCl3  
Temp: 25.0 C / 298.1 K  
Operator: chm  
File: 399.8529994-13C  
Nucleus: 13C

HRMS spectra of 9c

**Sample Name** ALB-PPG-RR-21      **Position** -1  
**Inf Vol** -10      **InfPosition**  
**Data Filename** ALB-PPG-RR-21.d      **ACQ Method**  
**Instrument Name** Instrument 1      **User Name**  
**SampleType** Sample      **TRM Calibration Status**  
**Comment**  
**Acquired Time** 3/20/2014 9:50:44 AM      **Success**

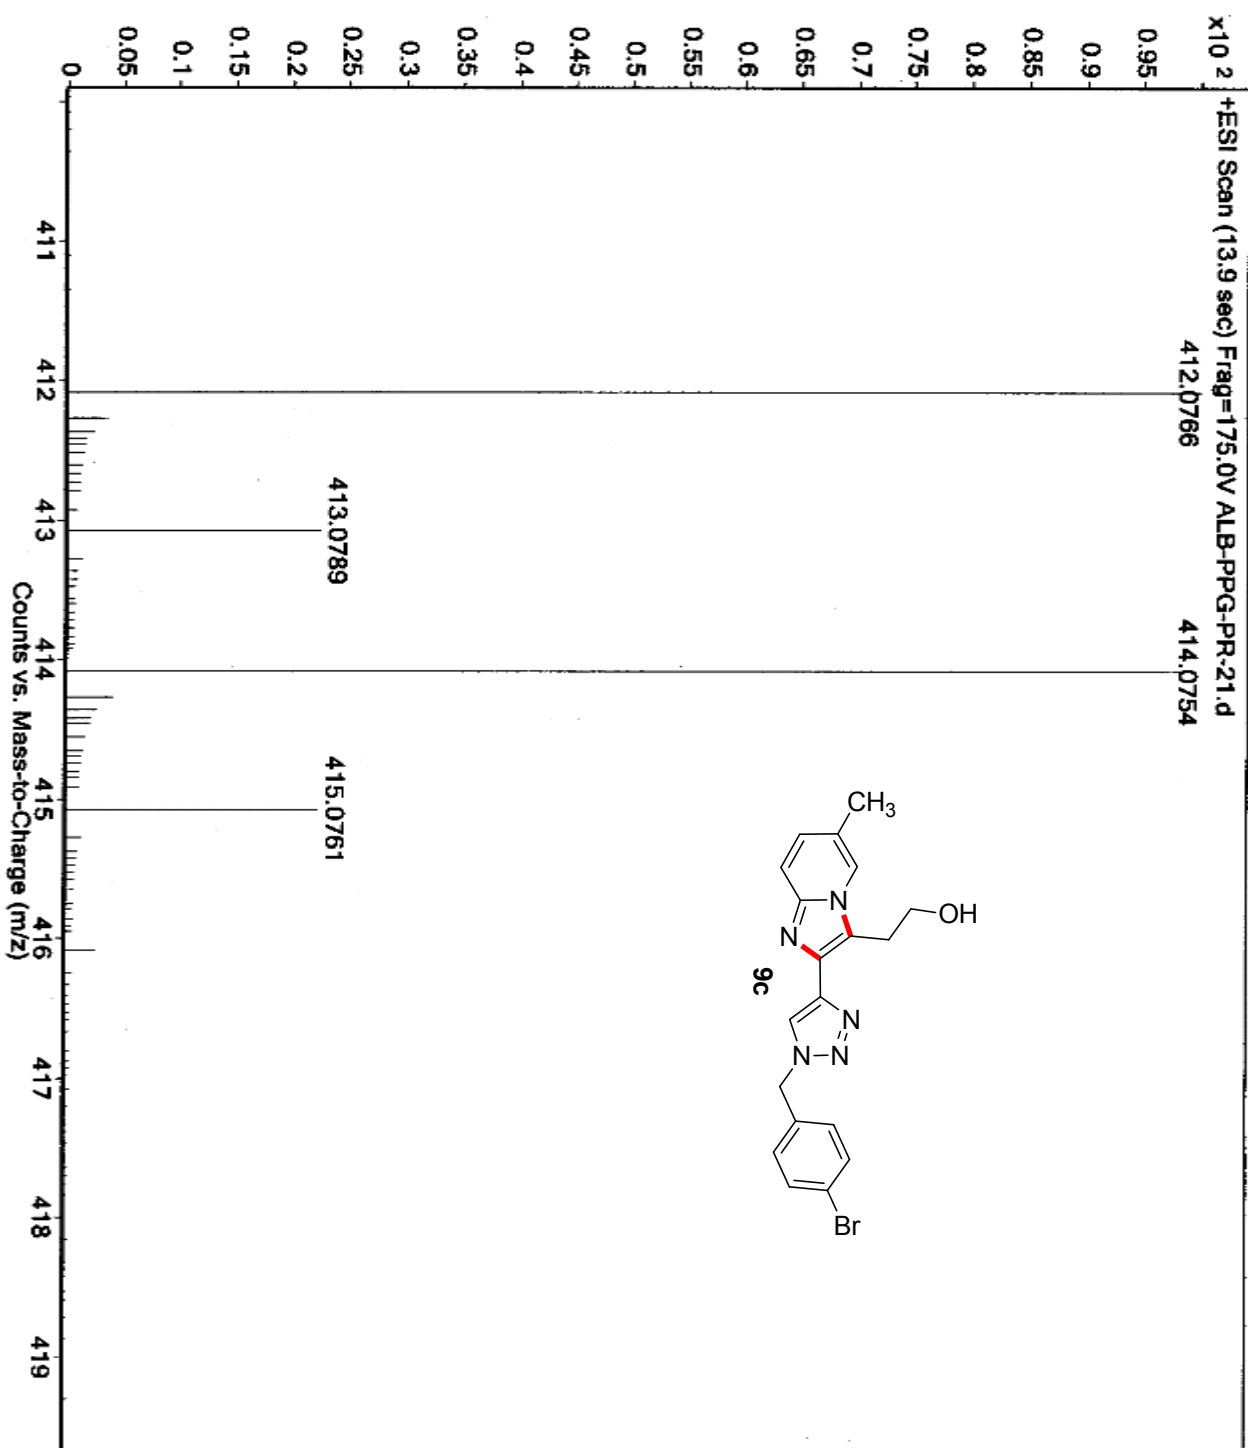



<sup>1</sup>H NMR spectra of 9d

ALD-PPG-PR-32-1H

Sample Name:  
ALD-PPG-PR-32-1H  
Data Collected on:  
ITG-NMR-mercury400  
Archive directory:  
/export/home/chempack/ymurys/data  
Sample directory:

Filename: ALD-PPG-PR-32-1H

Pulse Sequence: PROTON (s2pul)

Solvent: cdcl3

Data collected on: Aug 20 2014

Temp. 25.0 C / 298.1 K  
Operator: chem

Relax. delay 1.000 sec  
Pulse 45.0 degrees  
Acq. time 2.561 sec  
Width 6398.0 Hz  
32 repetitions  
OBSERVE H1, 399.851019 MHz  
DATA PROCESSING  
FT size 32768  
Total time 2 min 12 sec

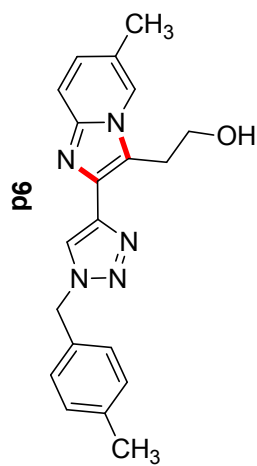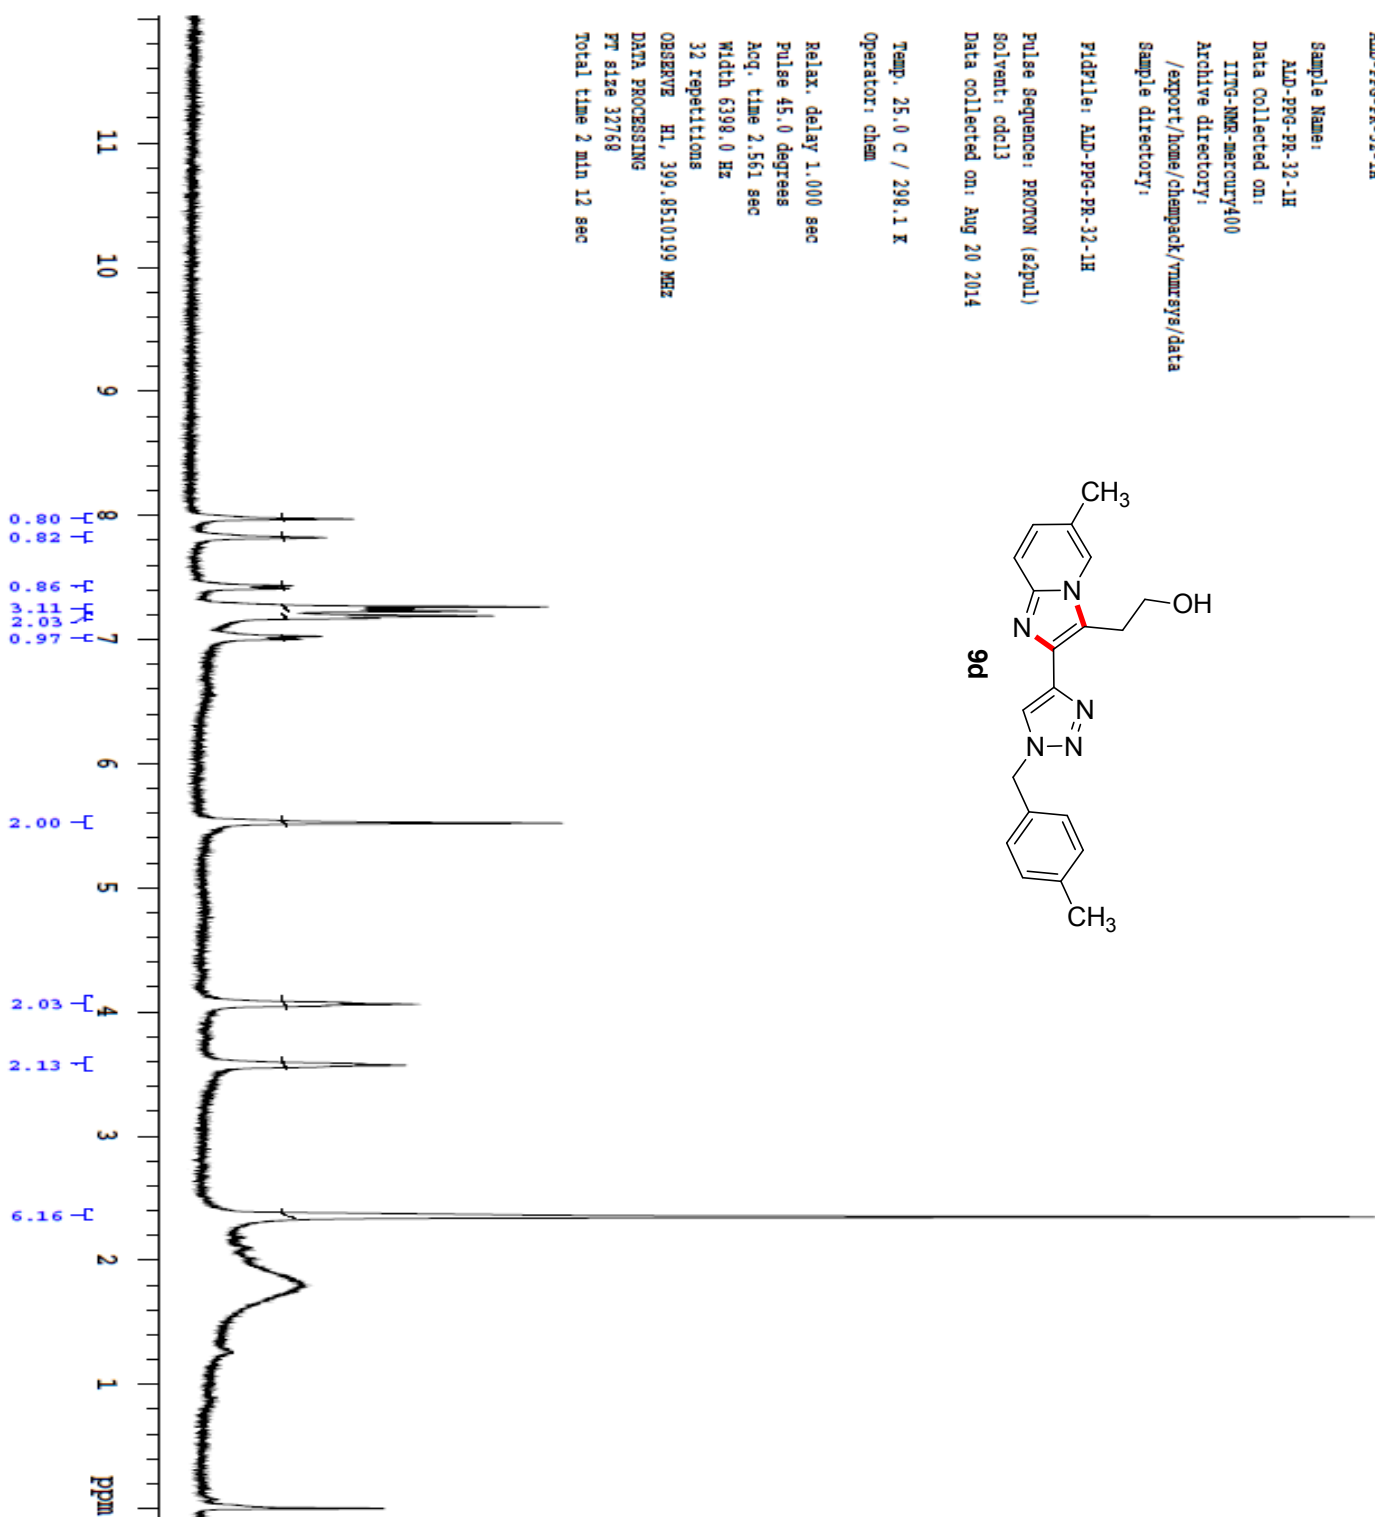

<sup>13</sup>C NMR spectra of 9d

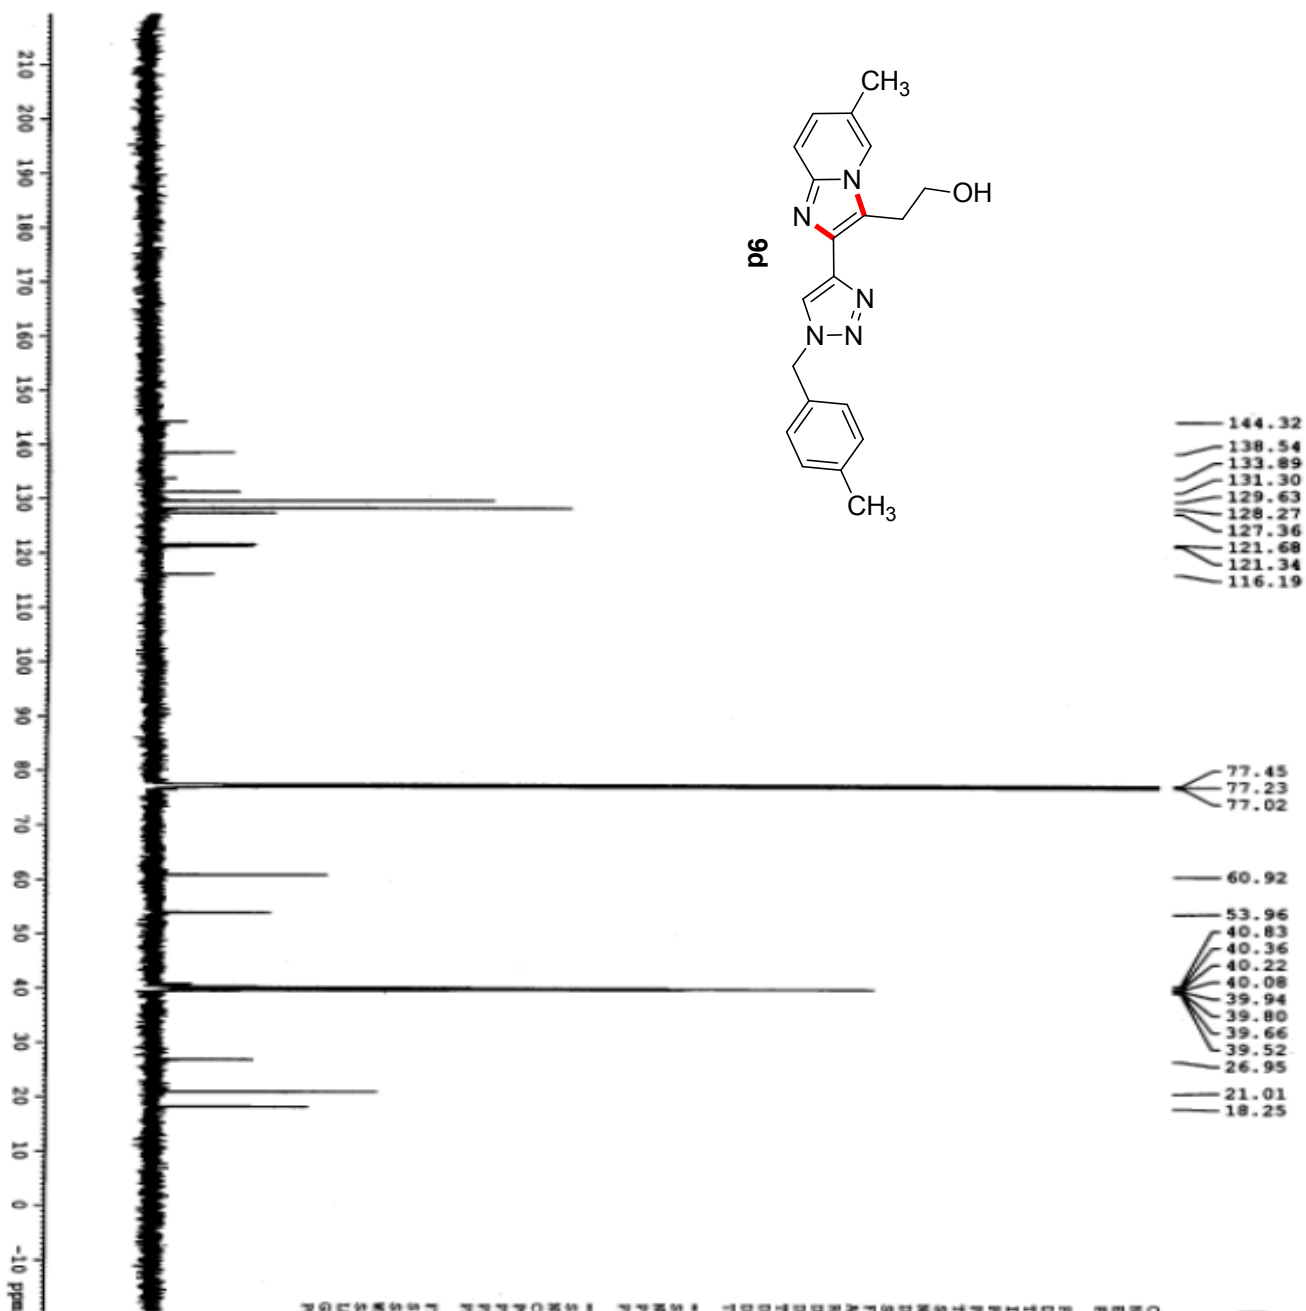

Current Data Parameters  
 NAME ALD-990-1932\_13C  
 EXPNO 1  
 PROCNO 1

F2 - Acquisition Parameters  
 Date\_ 20140821  
 Time 13.46  
 INSTRUM spect  
 PULPROG zgpg30  
 TD 32768  
 SOLVENT CDCl3  
 NS 815  
 DS 2  
 SWH 36057.491 MHz  
 FIDRES 1.100393 MHz  
 AQ 0.4543829 sec  
 RG 65.34  
 DW 13.867 usec  
 DE 6.50 usec  
 TE 298.2 K  
 D1 2.00000000 sec  
 D11 0.03000000 sec  
 T00 1

===== CHANNEL F1 =====  
 SFO1 150.9579571 MHz  
 NUC1 13C  
 P1 10.50 usec  
 PL1 95.00000000 W

===== CHANNEL F2 =====  
 SFO2 600.1724007 MHz  
 NUC2 1H  
 CHPROG12 waltz16  
 PCY2 70.00 usec  
 PL2 21.00000000 W  
 PL12 0.61714000 W  
 PL13 0.30239999 W

F2 - Processing parameters  
 SI 32768  
 SF 150.9128704 MHz  
 WIM EM  
 SSB 0  
 LB 1.00 Hz  
 GB 0  
 PC 1.40

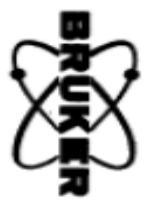

HRMS spectra of 9d

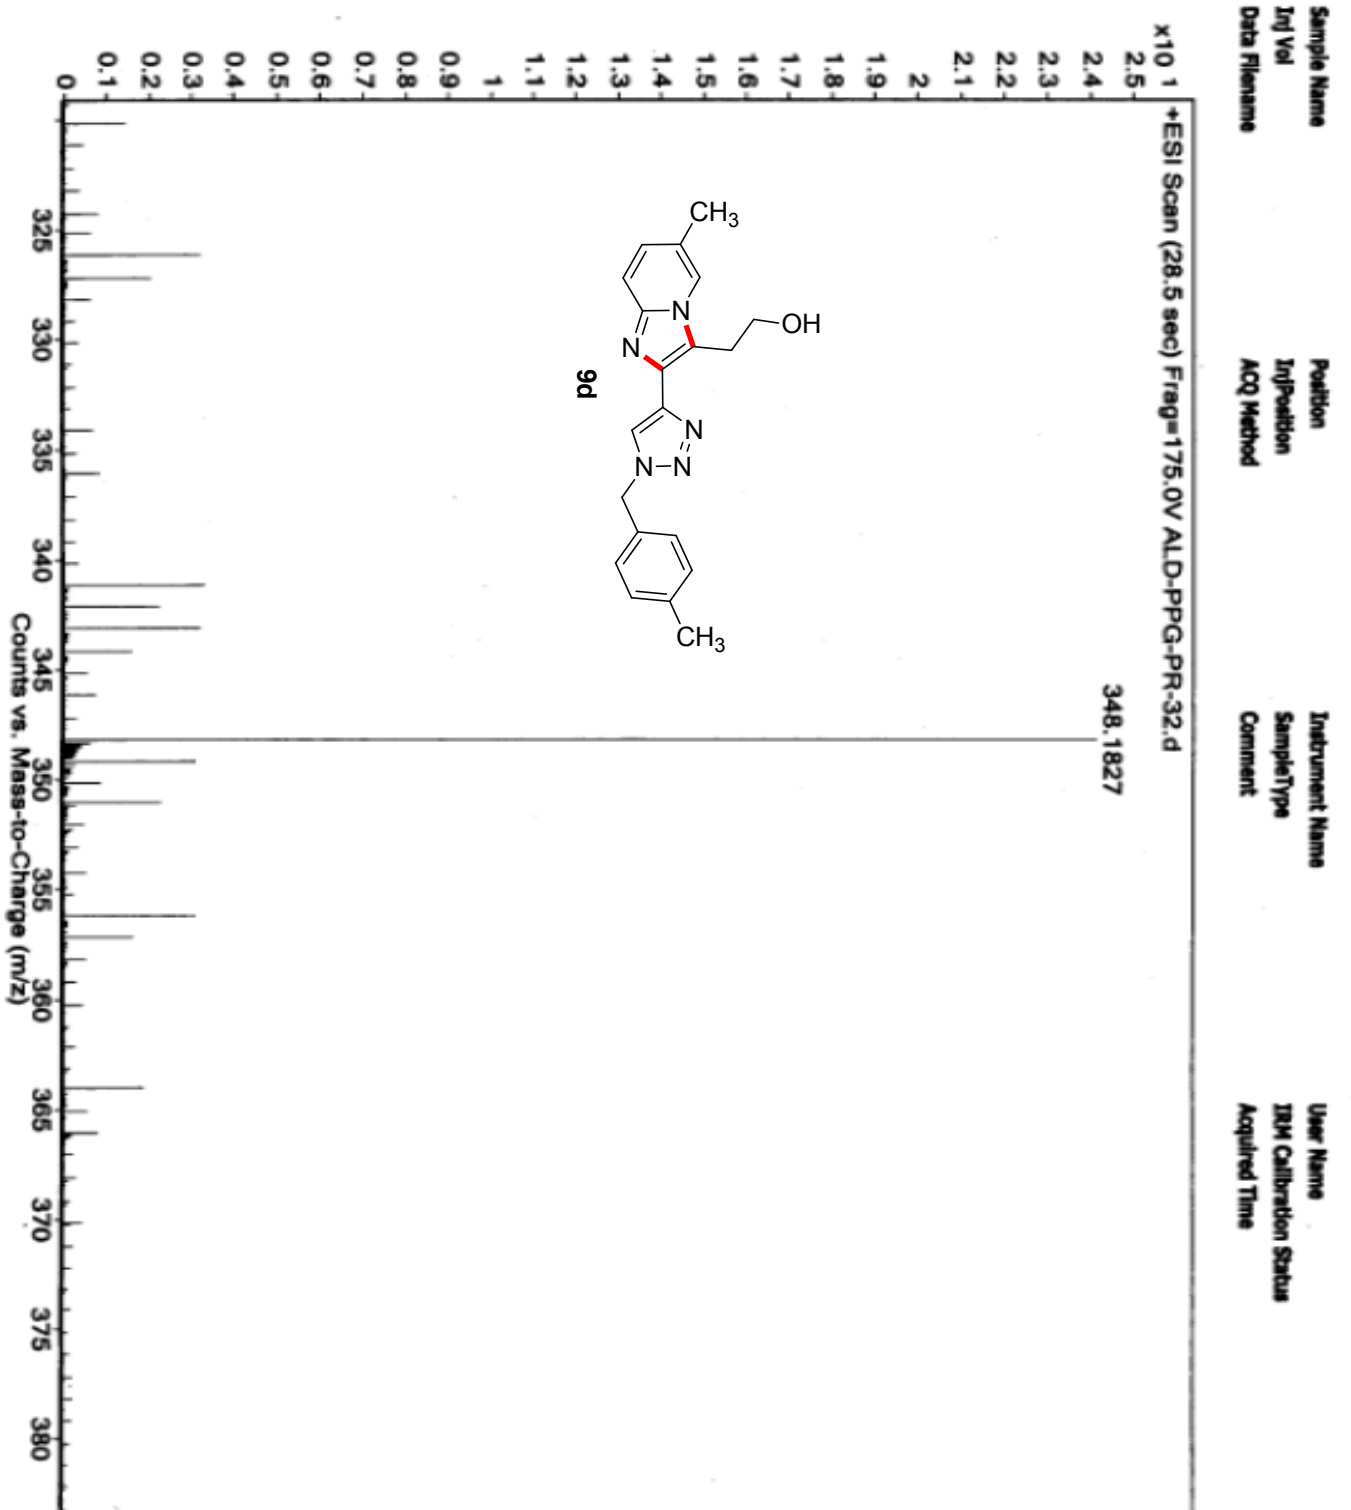

<sup>1</sup>H NMR spectra of **9e**

ALD-PPG-PR-34-1H

Sample Name:  
ALD-PPG-PR-34-1H  
Data Collected on:  
IITG-NMR-mercury400  
Archive directory:  
/home/yumrl/yumrmys/data/fid11b  
Sample directory:  
Ethylandanone  
FIDFile: ALD-PPG-PR-34-1H  
Pulse Sequence: PROTON (s2pul)  
Solvent: cdcl3  
Data collected on: Aug 21 2014

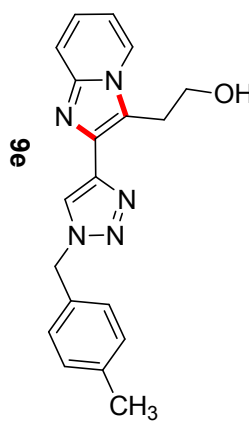

Temp. 25.0 C / 299.1 K  
Operator: chem

Relax. delay 1.000 sec  
Pulse 45.0 degrees  
Acq. time 2.561 sec  
Width 6398.0 Hz  
32 repetitions  
OBSERVE H1, 399.8509535 MHz  
DATA PROCESSING  
PT. size 32768  
Total time 2 min 12 sec

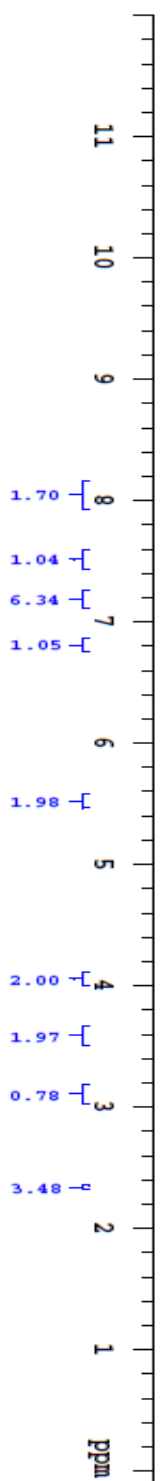

<sup>13</sup>C NMR spectra of 9e

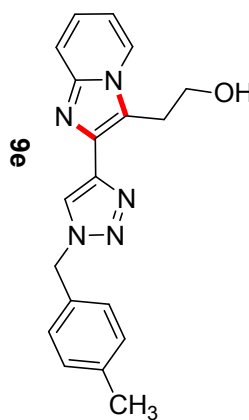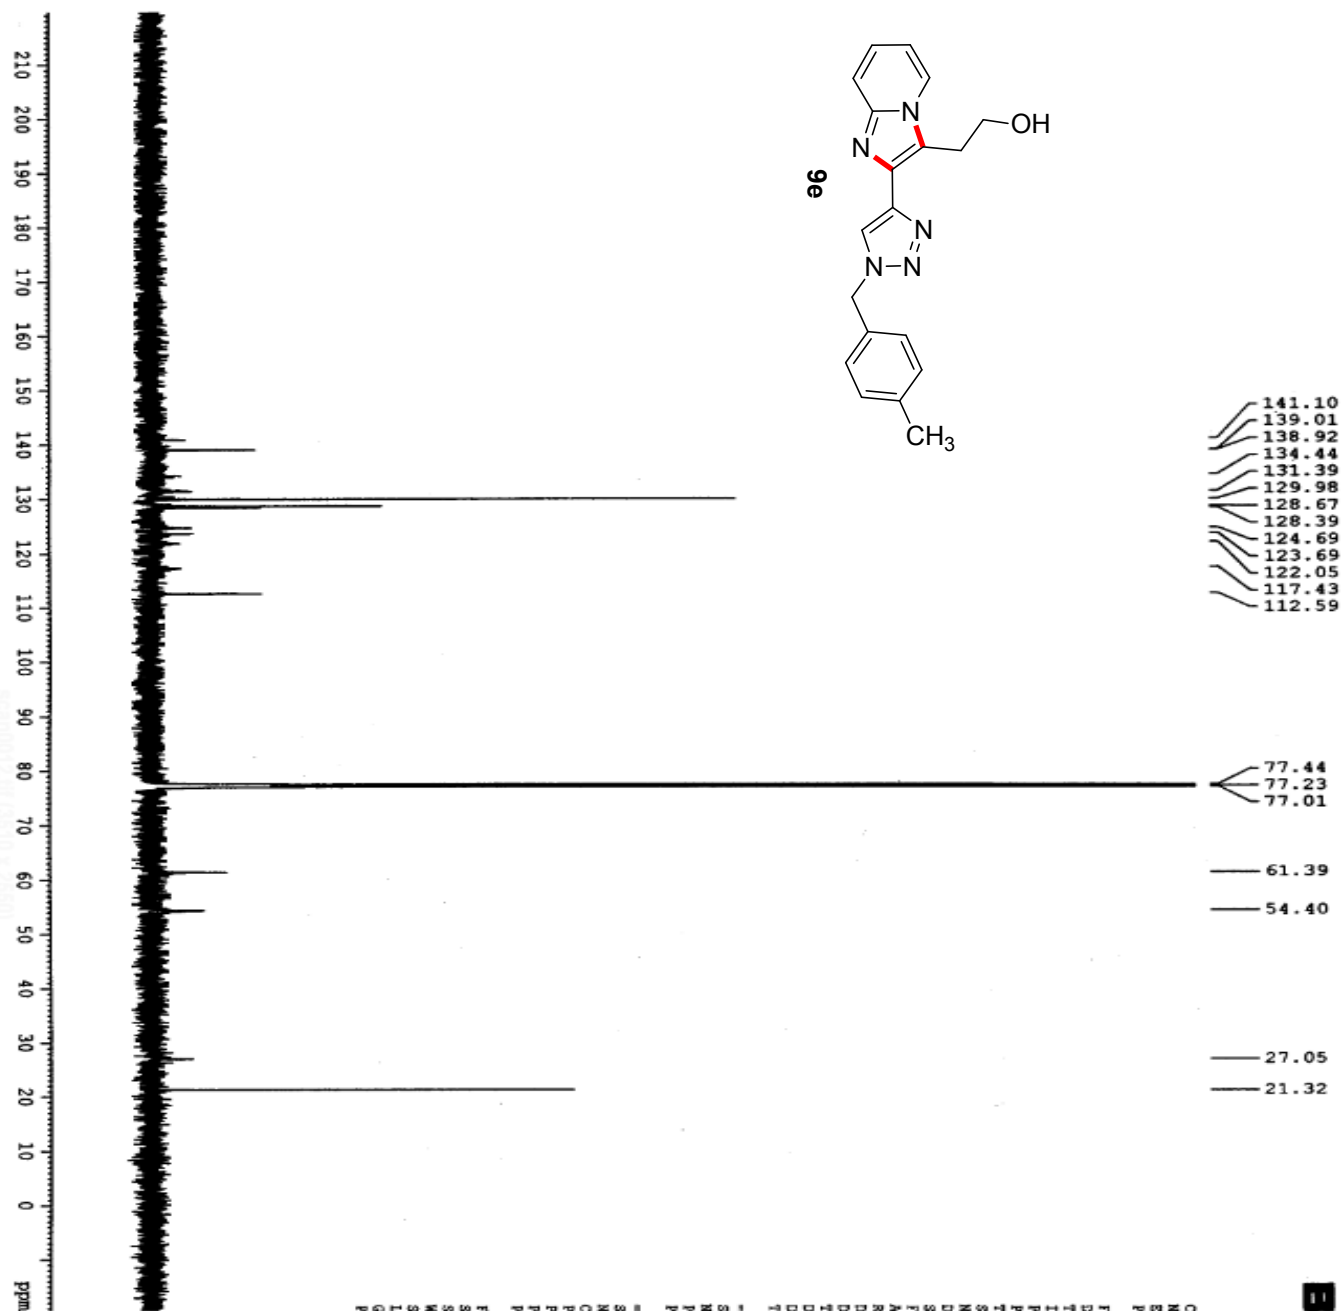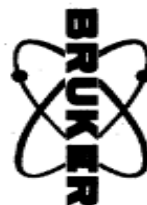

Current Data Parameters  
 NAME ALD-PFG-PR34\_13C  
 EXNO 1  
 PROCNO 1

F2 - Acquisition Parameters  
 Date 20160921  
 Time 14:24

INSTRUM spect  
 PROBRD 5 mm PABBO BB/  
 PULPROG zgpg30  
 TD 32768  
 SOLTVENT CDCl3  
 NS 1094  
 DS 2

SMH 36051.691 Hz  
 FIDRES 1.100993 Hz  
 AQ 0.1543829 sec  
 RG 65.24  
 DM 13.867 usec  
 DE 6.50 usec  
 TE 299.1 K  
 D1 2.00000000 sec  
 D11 0.03000000 sec  
 TDO 1

CHANNEL F1  
 SFO1 150.9279571 MHz  
 NUC1 13C  
 P1 10.50 usec  
 PL1 95.00000000 W

CHANNEL F2  
 SFO2 600.1124007 MHz  
 NUC2 1H  
 CDPORG12 waltz16  
 PCPD2 70.00 usec  
 PAM2 21.00000000 W  
 PAM12 0.61114000 W  
 PAM13 0.30239999 W

F2 - Processing parameters  
 SI 16384  
 SF 150.9128393 MHz  
 KCM KM  
 SSB 0  
 LB 1.00 Hz  
 GB 0  
 PC 1.40

HRMS spectra of 9e

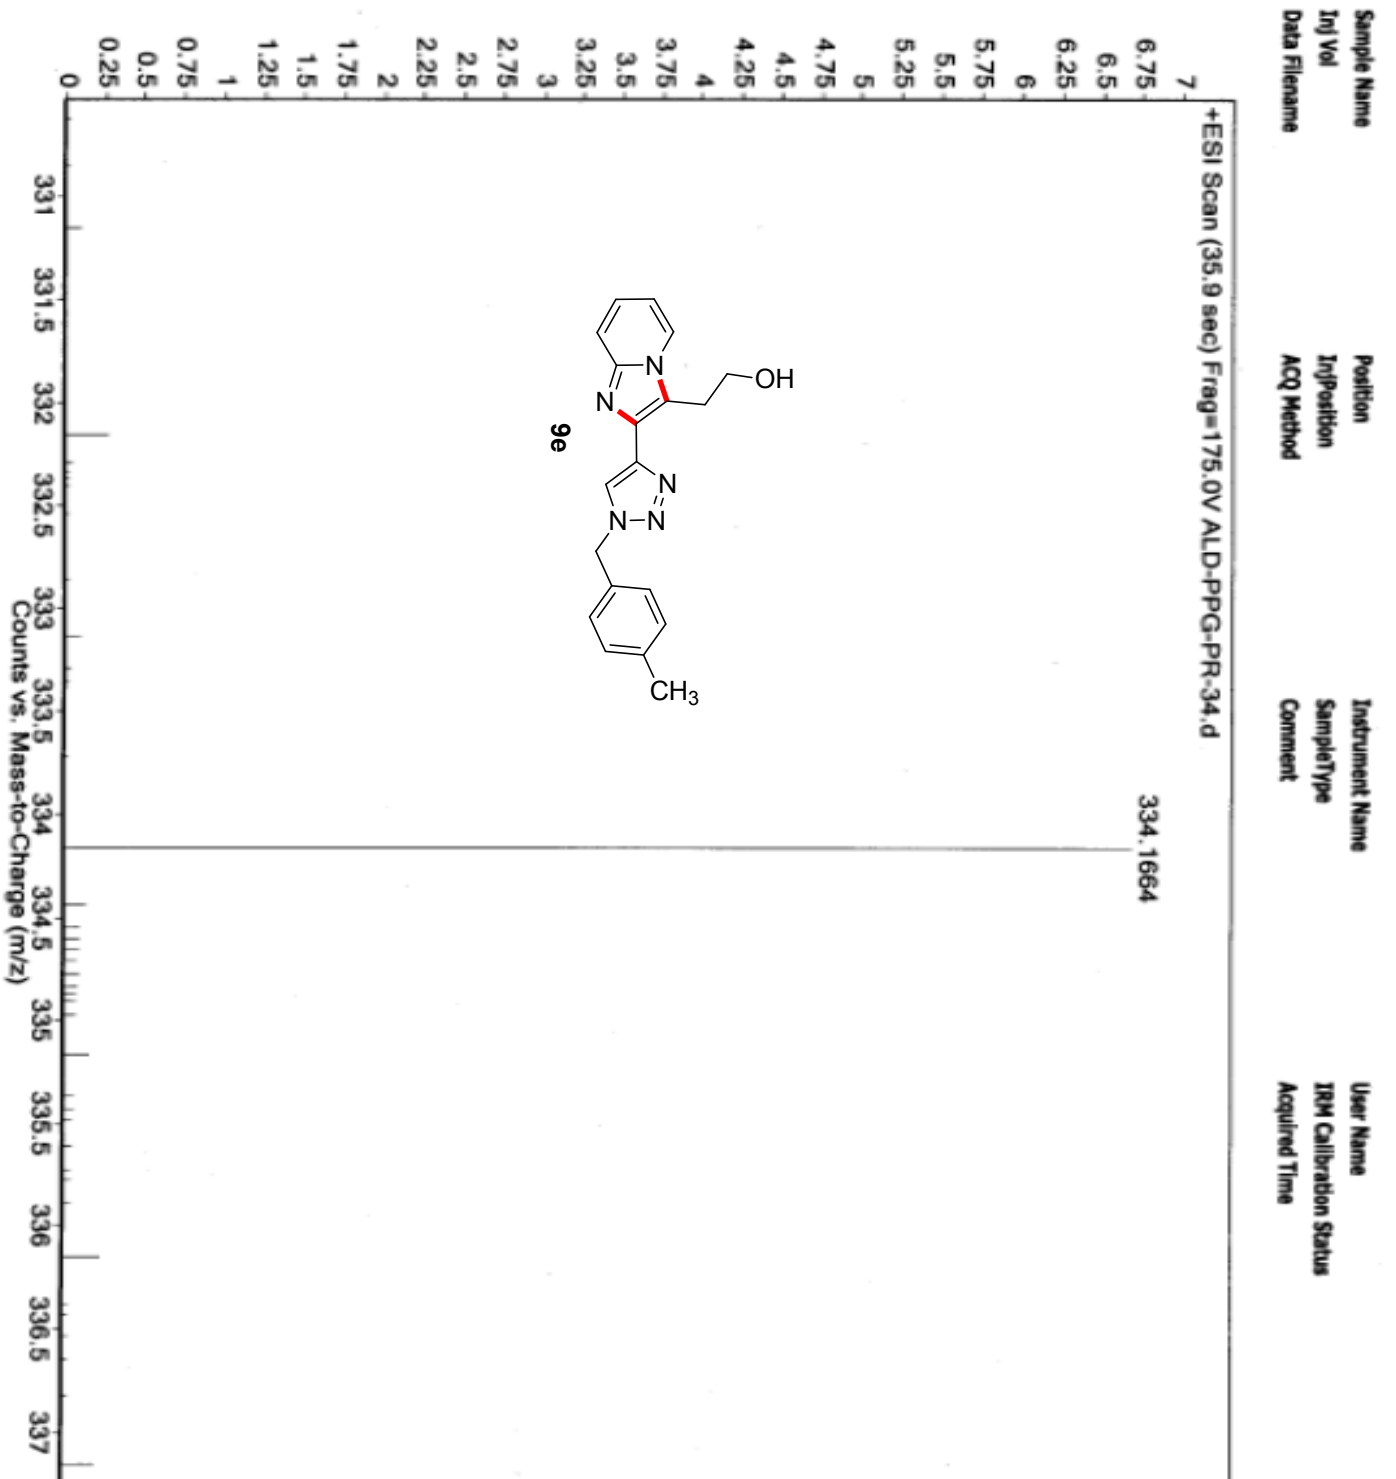

Supplement: c5ra09671e1.pdf [file c5ra09671e1.pdf]
